# Supplementary material for: Polyether-tethered imidazole-2-thiones, imidazole-2-selenones and imidazolium salts as collectors for the flotation of lithium aluminate and spodumene
Source: Royal Society of Chemistry journal article supplement (doi:10.1039/d2ra07627f), 2023-01-01
Supplement: d2ra07627f1.pdf [file d2ra07627f1.pdf]

Supporting information

## **Polyether-tethered imidazole-2-thiones, imidazole-2-selenones and imidazolium salts as collectors for the flotation of lithium aluminate and spodumene**

Sophie Acker, Jan C. Namyslo, Martin Rudolph, Franziska Strube, Ursula E. A. Fittschen, Hao Qiu, Daniel Goldmann, and Andreas Schmidt\*

### **Contents**

|      |                                           |    |
|------|-------------------------------------------|----|
| 1.   | NMR spectra of 2a.....                    | 2  |
| 2.   | NMR spectra of 2b.....                    | 3  |
| 3.   | NMR spectra of 3a.....                    | 5  |
| 4.   | NMR spectra of 3b.....                    | 6  |
| 5.   | NMR spectra of 4a.....                    | 8  |
| 6.   | NMR spectra of 4b.....                    | 9  |
| 7.   | NMR spectra of 5a.....                    | 11 |
| 8.   | NMR spectra of 5b.....                    | 12 |
| 9.   | NMR spectra of 6a.....                    | 15 |
| 10.  | NMR spectra of 6b.....                    | 16 |
| 11.  | NMR spectra of 7a.....                    | 18 |
| 12.  | NMR spectra of 7b.....                    | 20 |
| 13.  | NMR spectra of 8a.....                    | 21 |
| 14.  | NMR spectra of 8b.....                    | 23 |
| 15.  | NMR-Experiment for proof of carbene ..... | 24 |
| 16.  | HOMO/LUMO calculations .....              | 26 |
| 17.  | Particle size .....                       | 43 |
| 17.1 | Lithium aluminate.....                    | 43 |
| 17.2 | Gehlenite.....                            | 46 |
| 17.3 | Spodumene .....                           | 49 |

# 1. NMR spectra of 2a

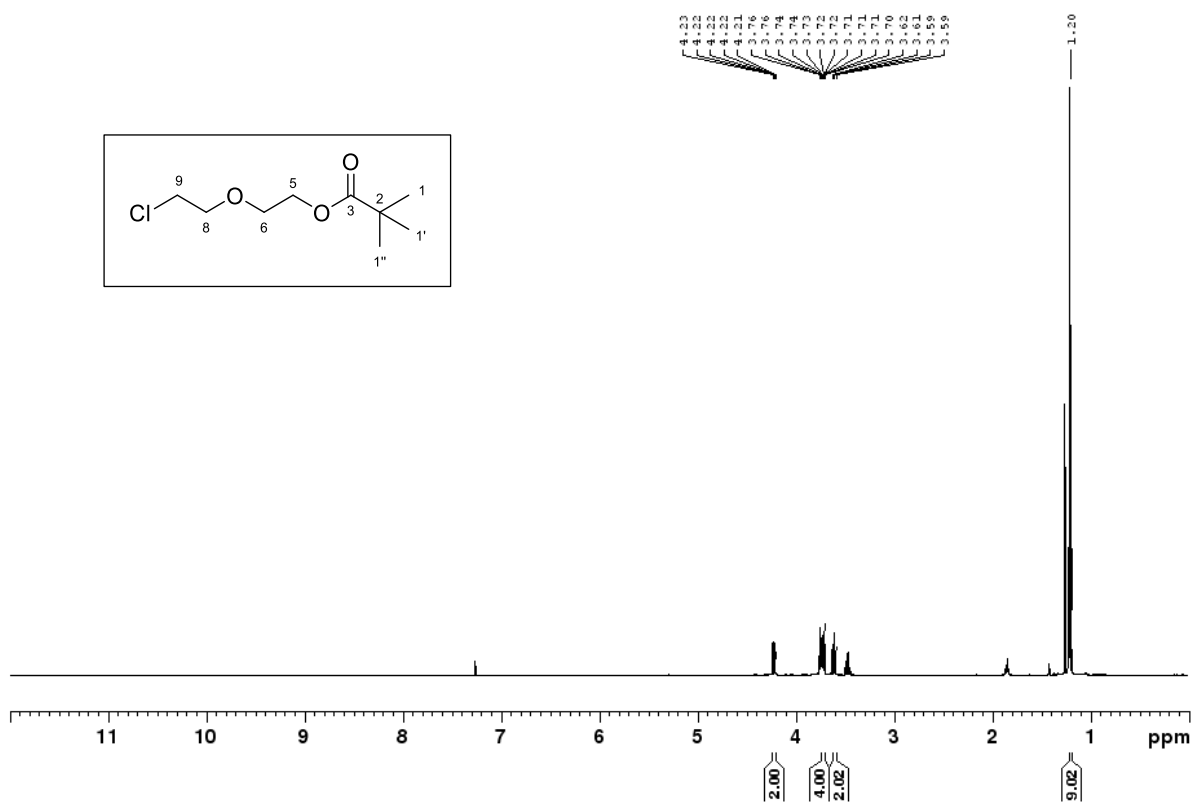

Figure 1: <sup>1</sup>H-NMR of 2a.

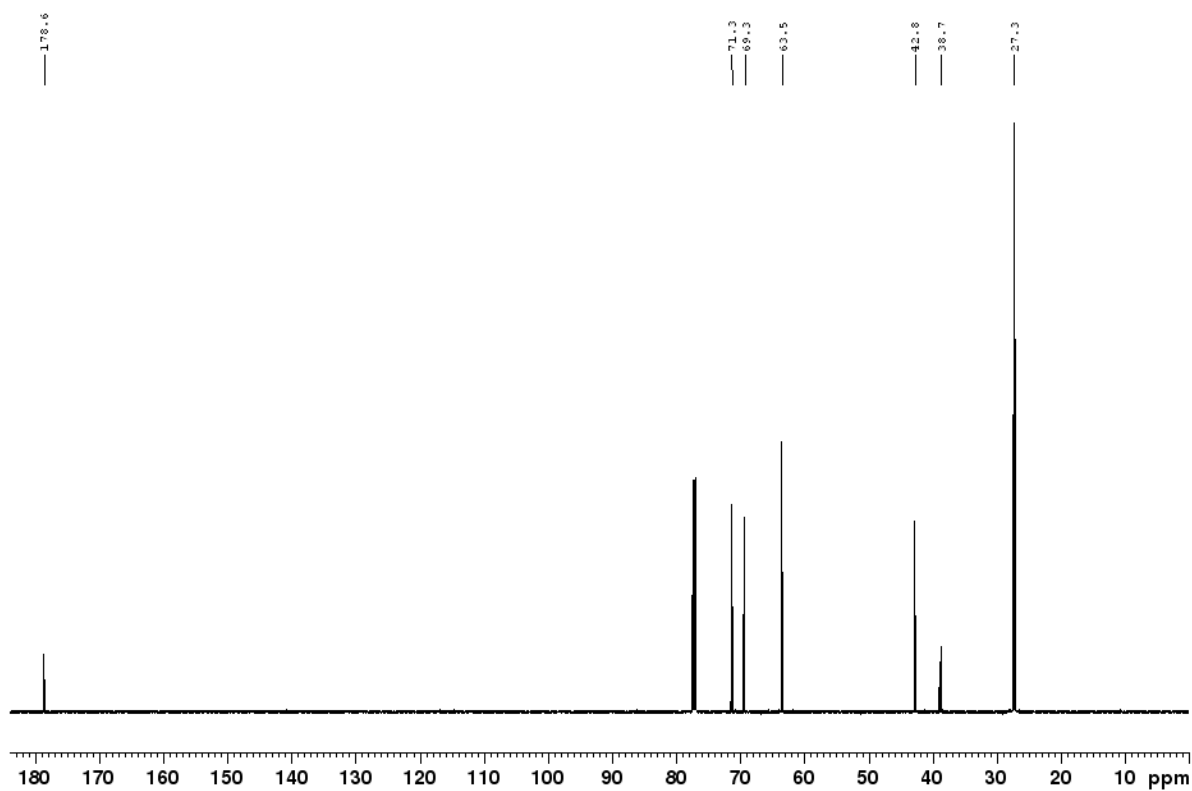

Figure 2: <sup>13</sup>C-NMR of 2a.

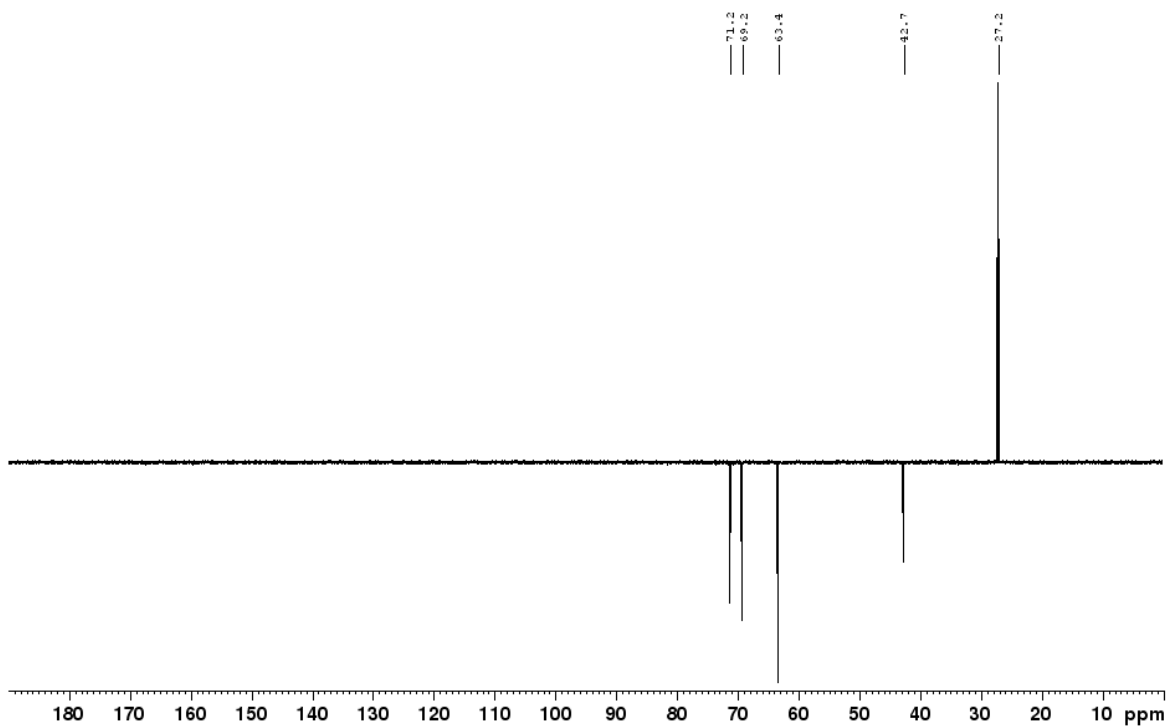

Figure 3: DEPT-135-spectrum of 2a.

## 2. NMR spectra of 2b

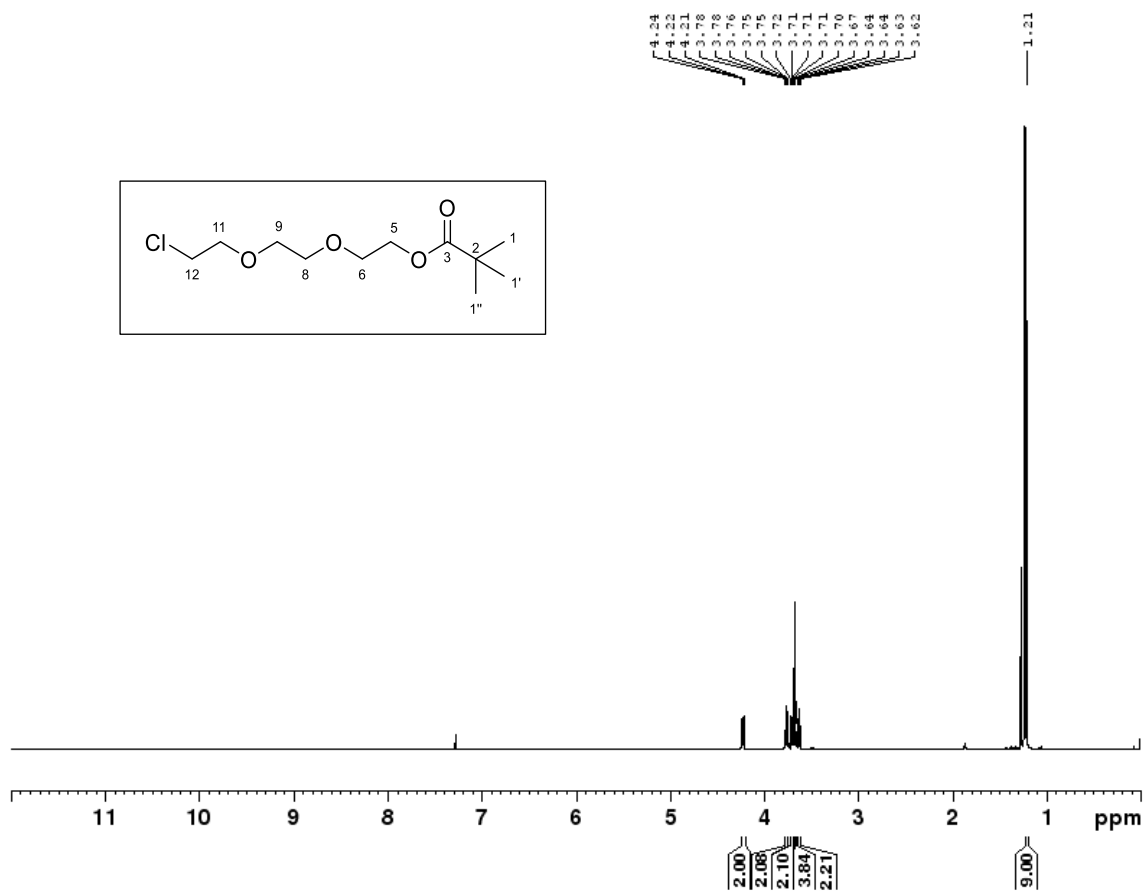

Figure 4:  $^1\text{H}$ -NMR of 2b.

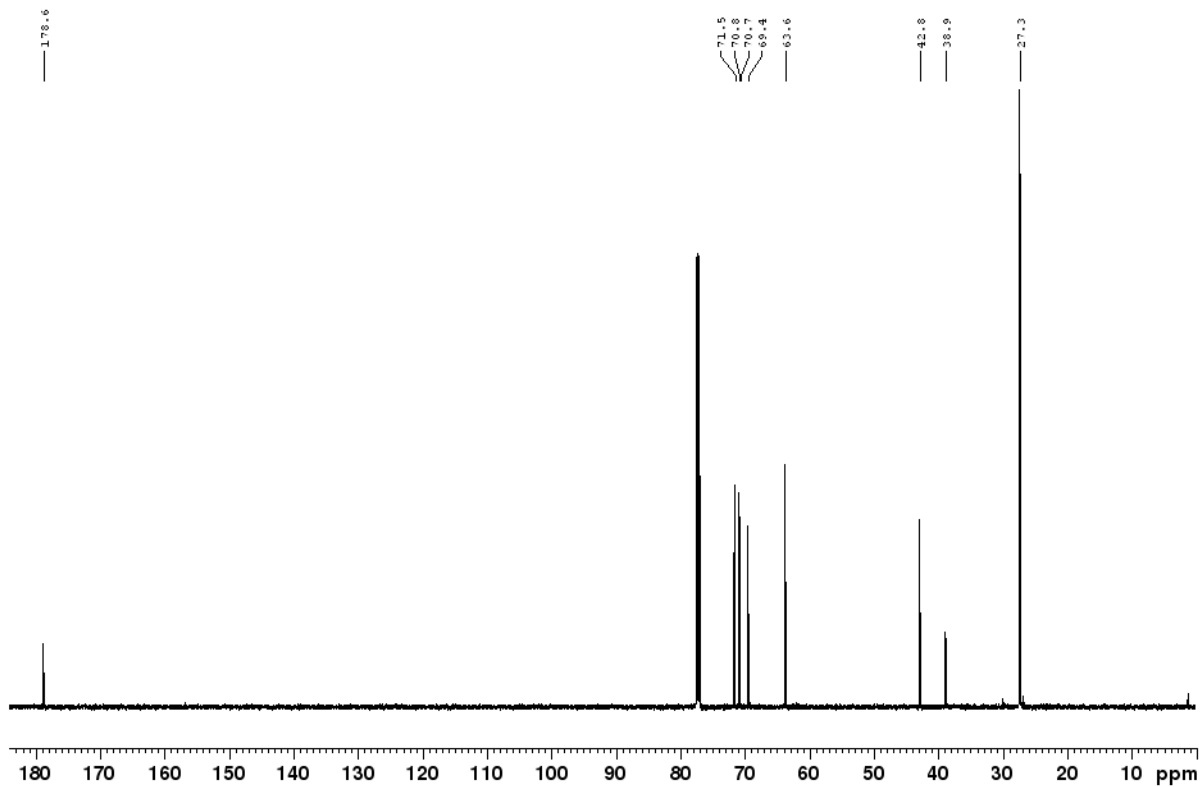

Figure 5:  $^{13}\text{C}$ -NMR of 2b.

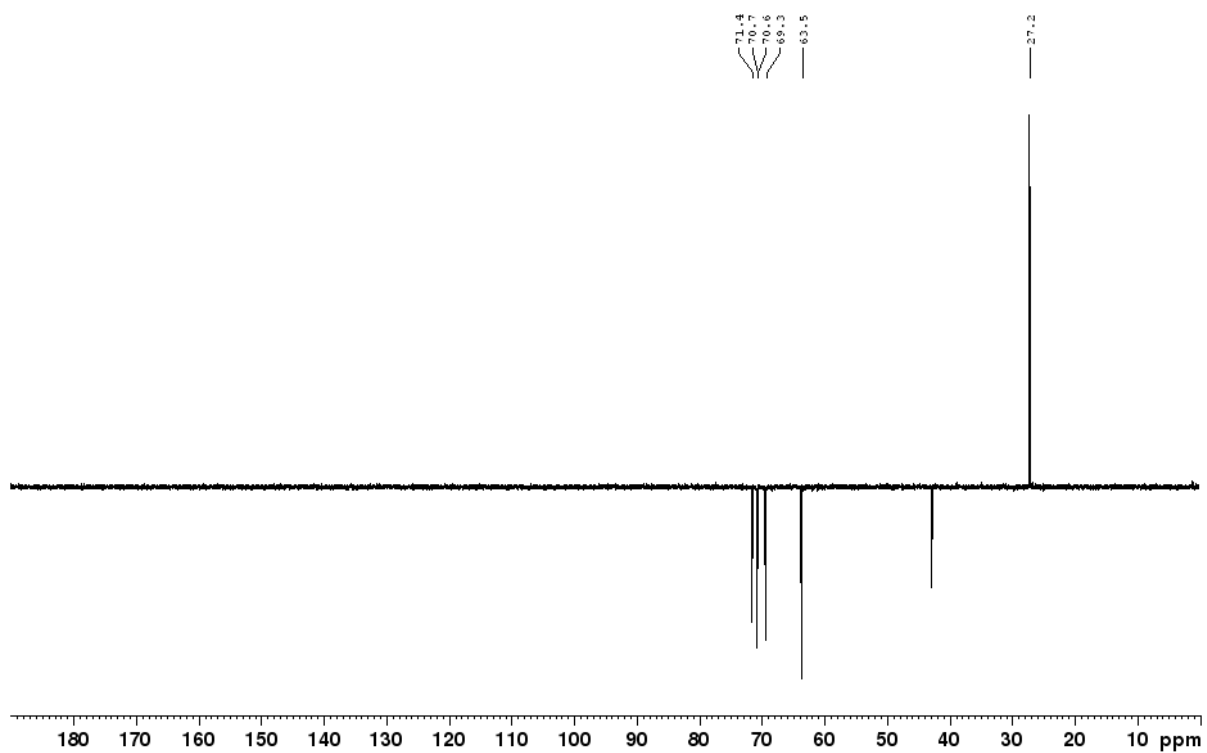

Figure 6: DEPT-135-spectrum of 2b.

### 3. NMR spectra of 3a

The spectra show impurities of the precursor compound **2b** which could not be separated by common purification methods.

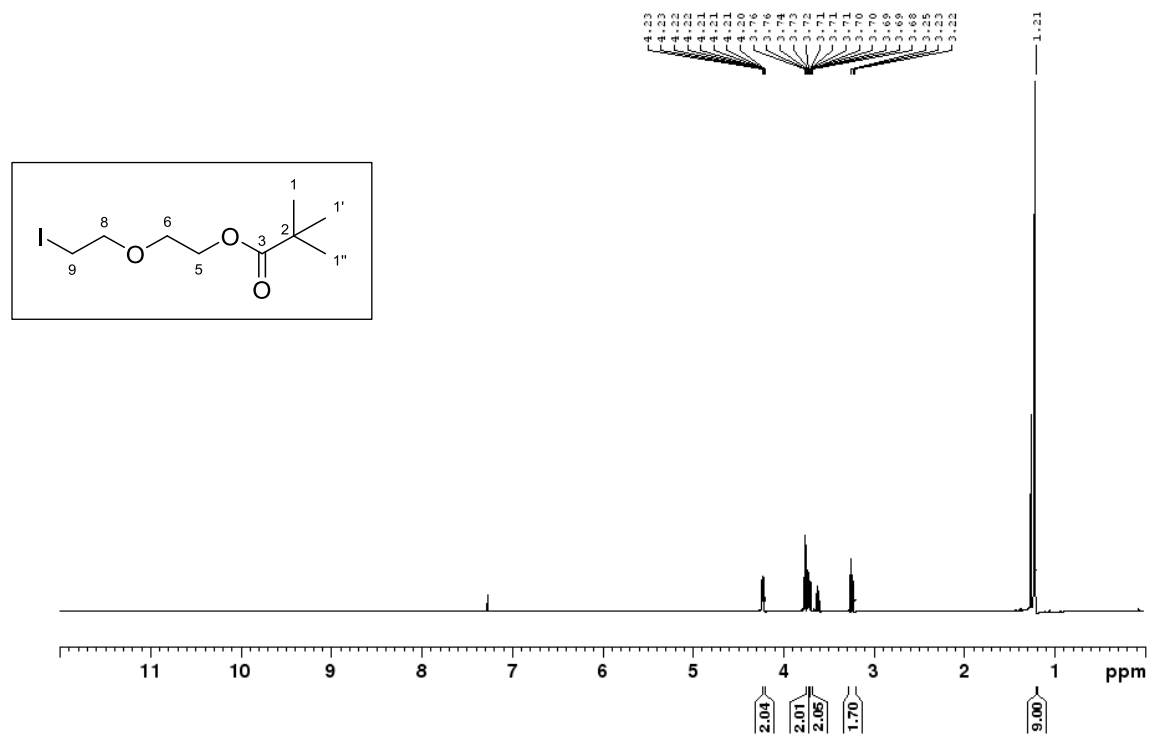

Figure 7: <sup>1</sup>H-NMR of 3a.

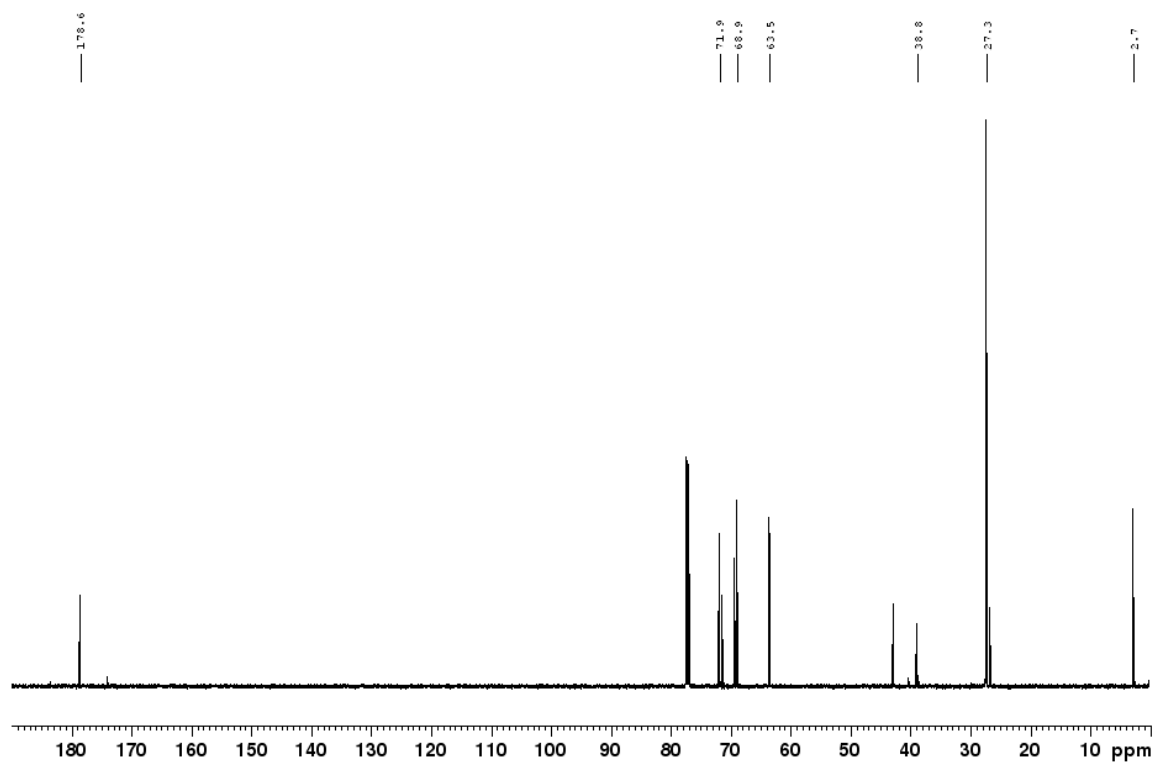

Figure 8: <sup>13</sup>C-NMR of 3a.

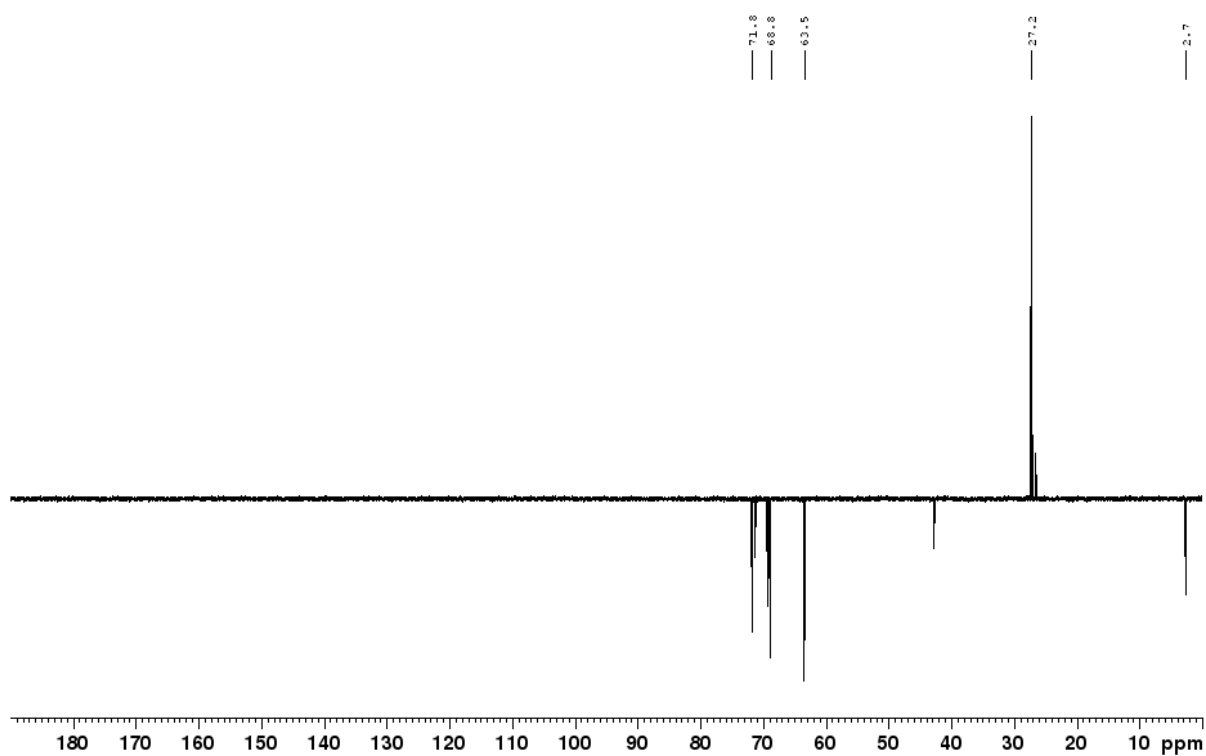

Figure 9: DEPT-135-spectrum of 3a.

#### 4. NMR spectra of 3b

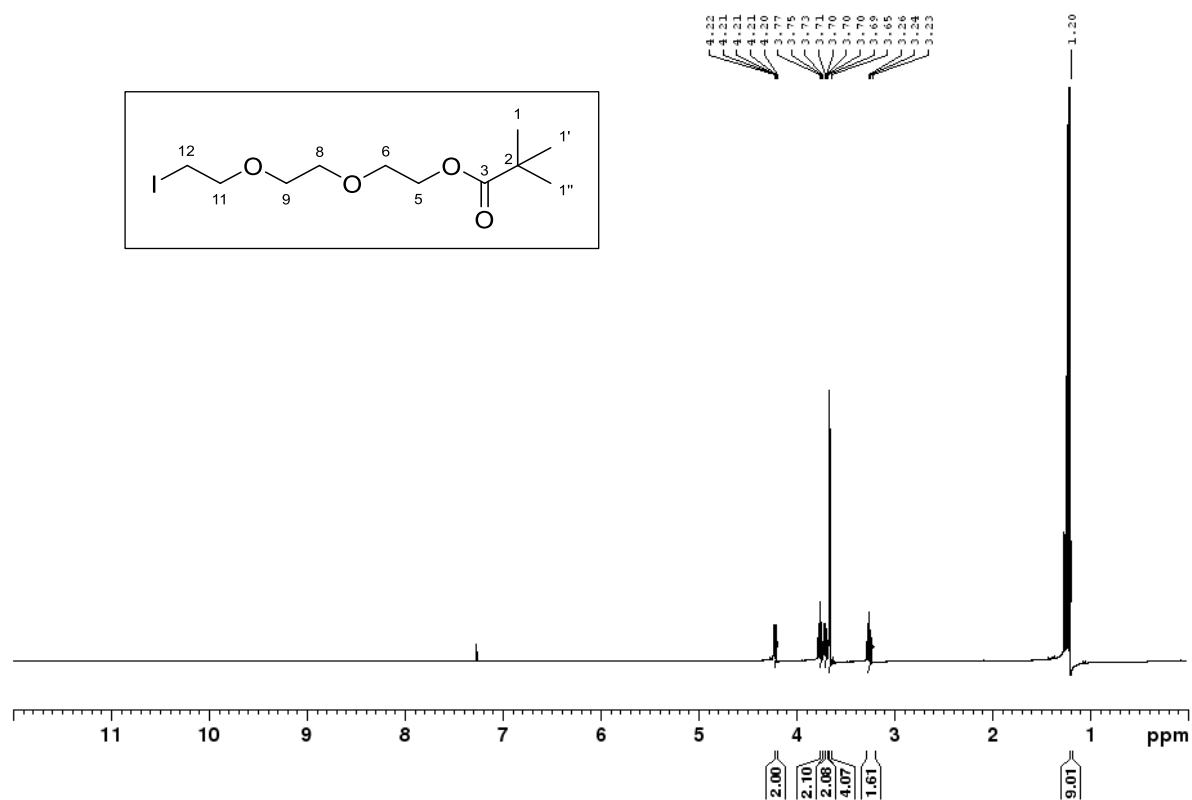

Figure 10:  $^1\text{H}$ -NMR of 3b.

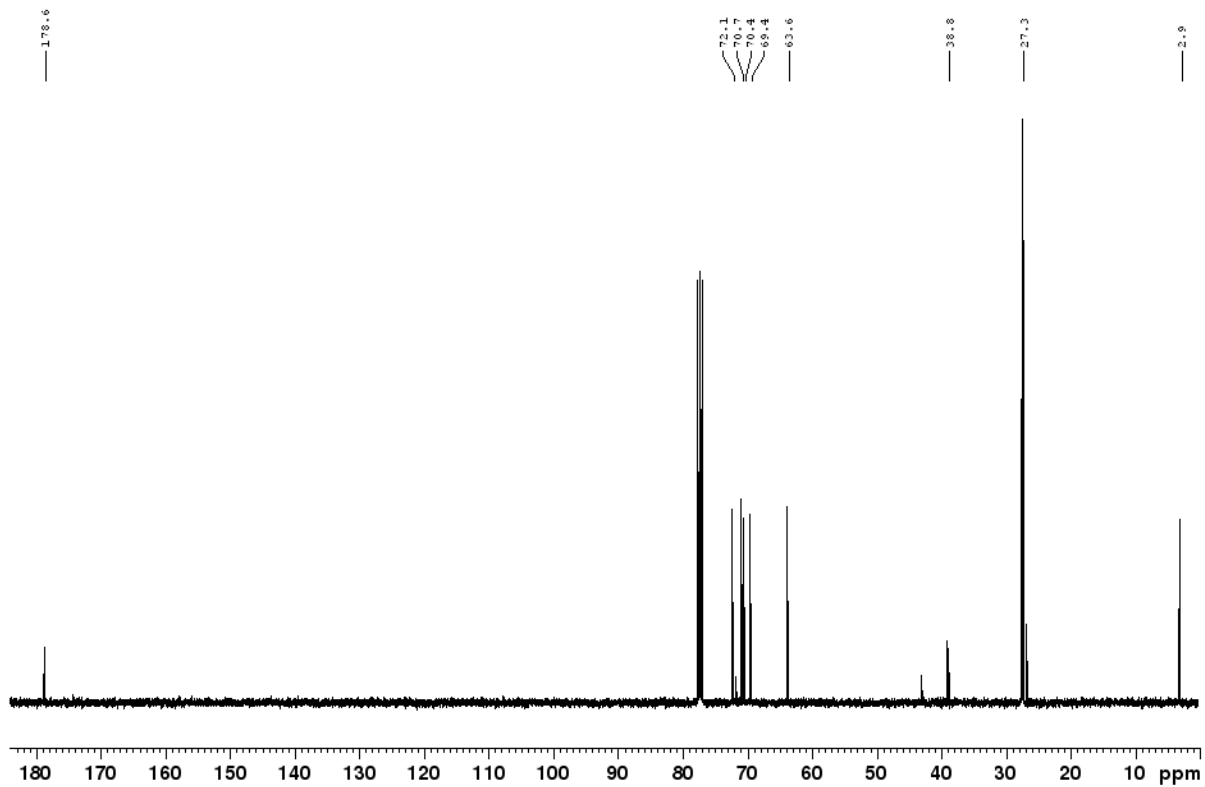

Figure 11:  $^{13}\text{C}$ -NMR of 3b.

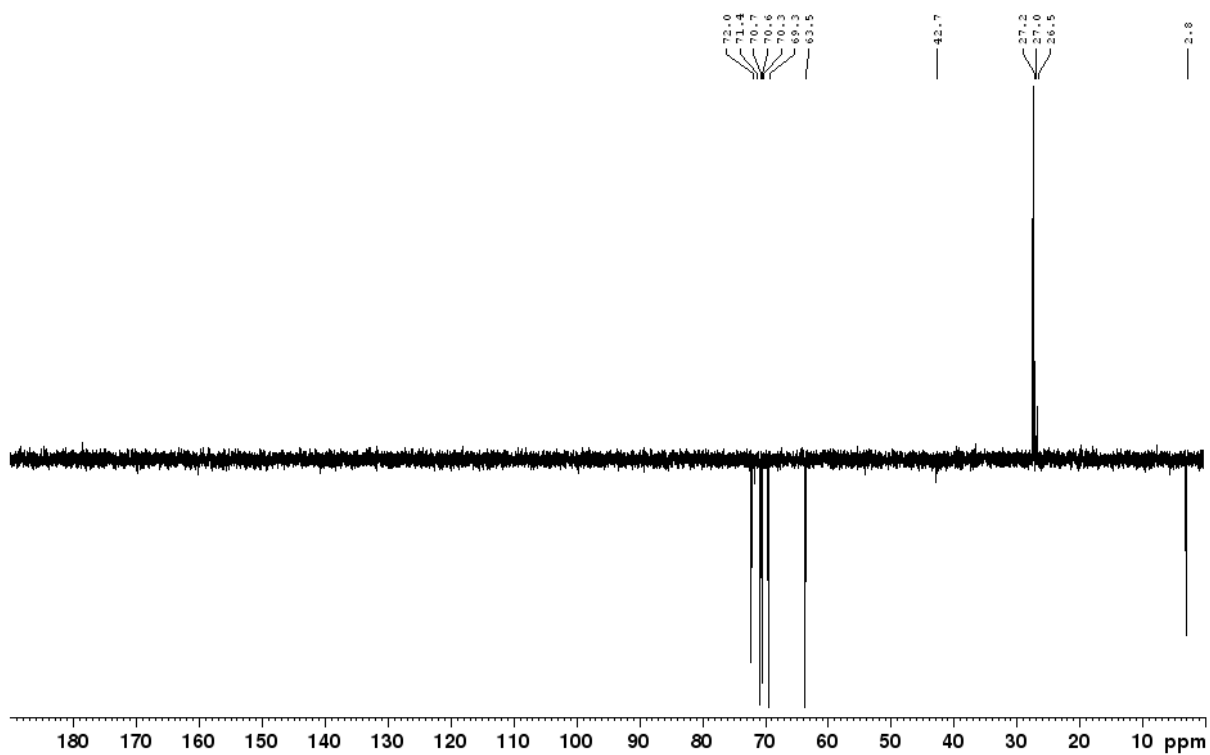

Figure 12: DEPT-135-spectrum of 3b.

## 5. NMR spectra of 4a

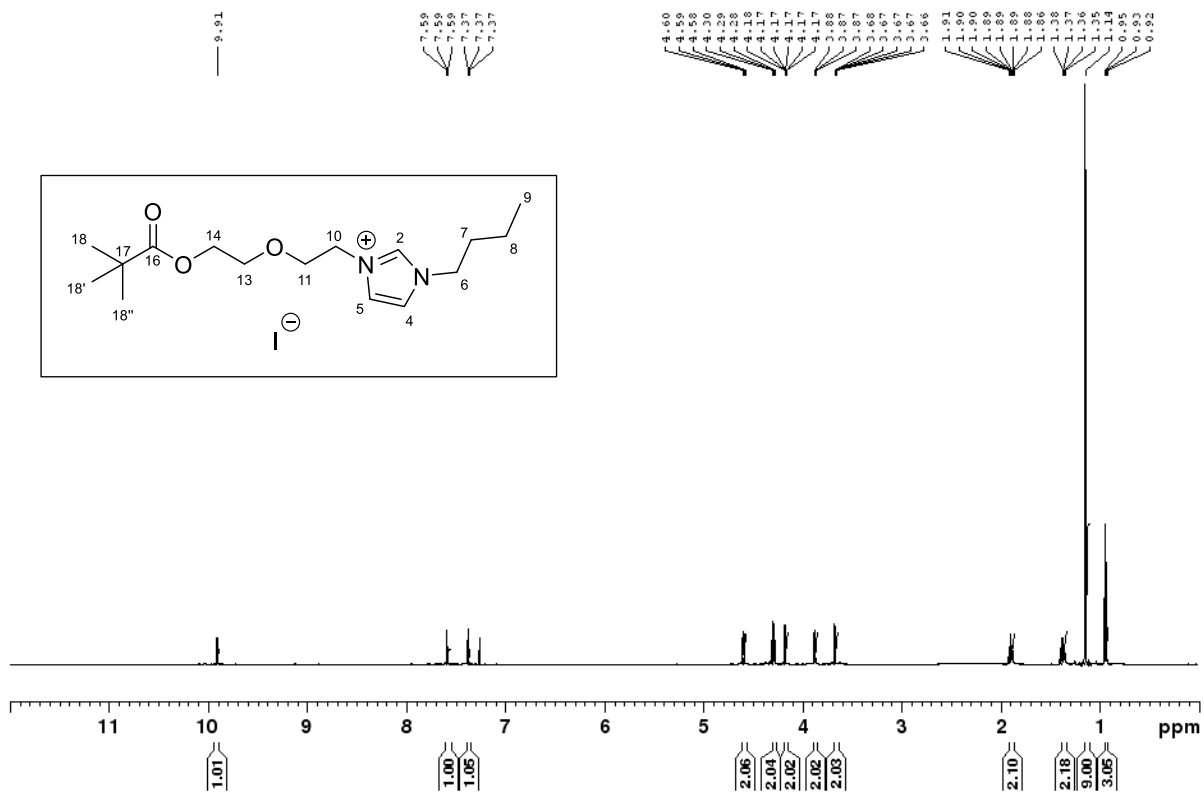

Figure 13: <sup>1</sup>H-NMR of 4a.

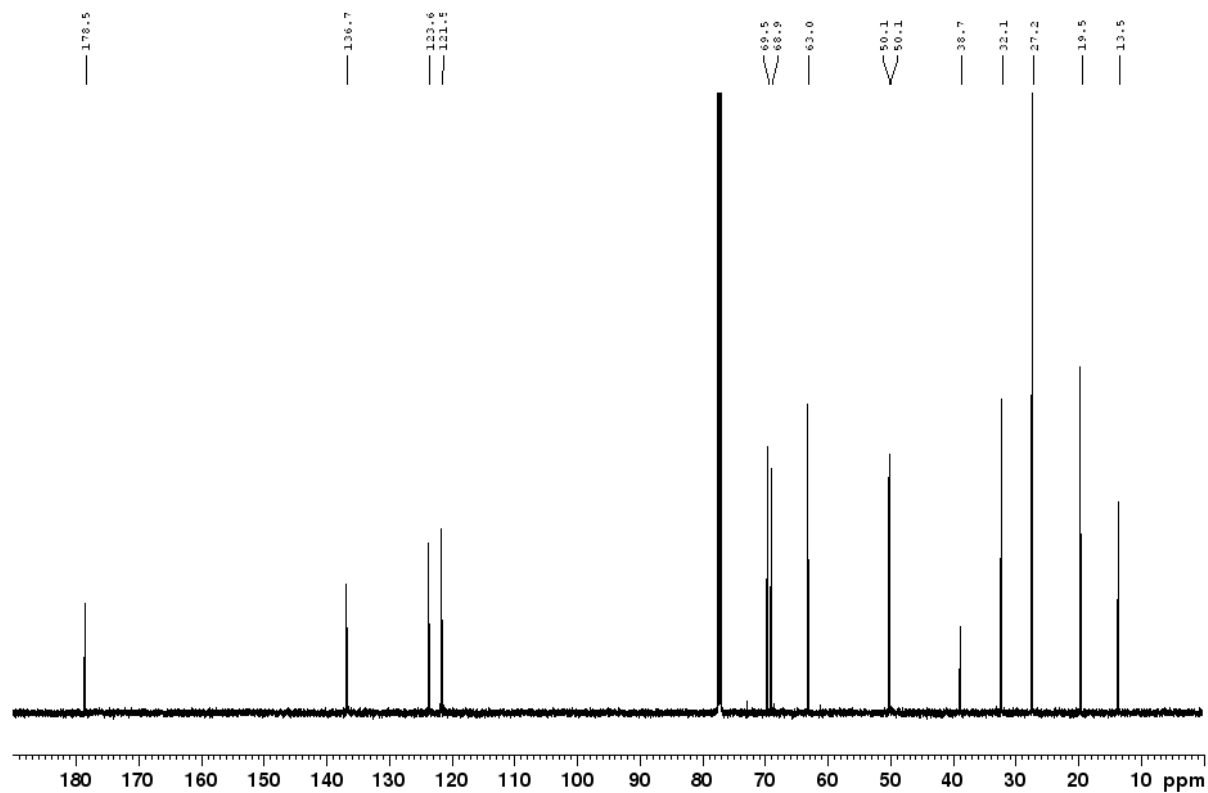

Figure 14: <sup>13</sup>C-NMR of 4a.



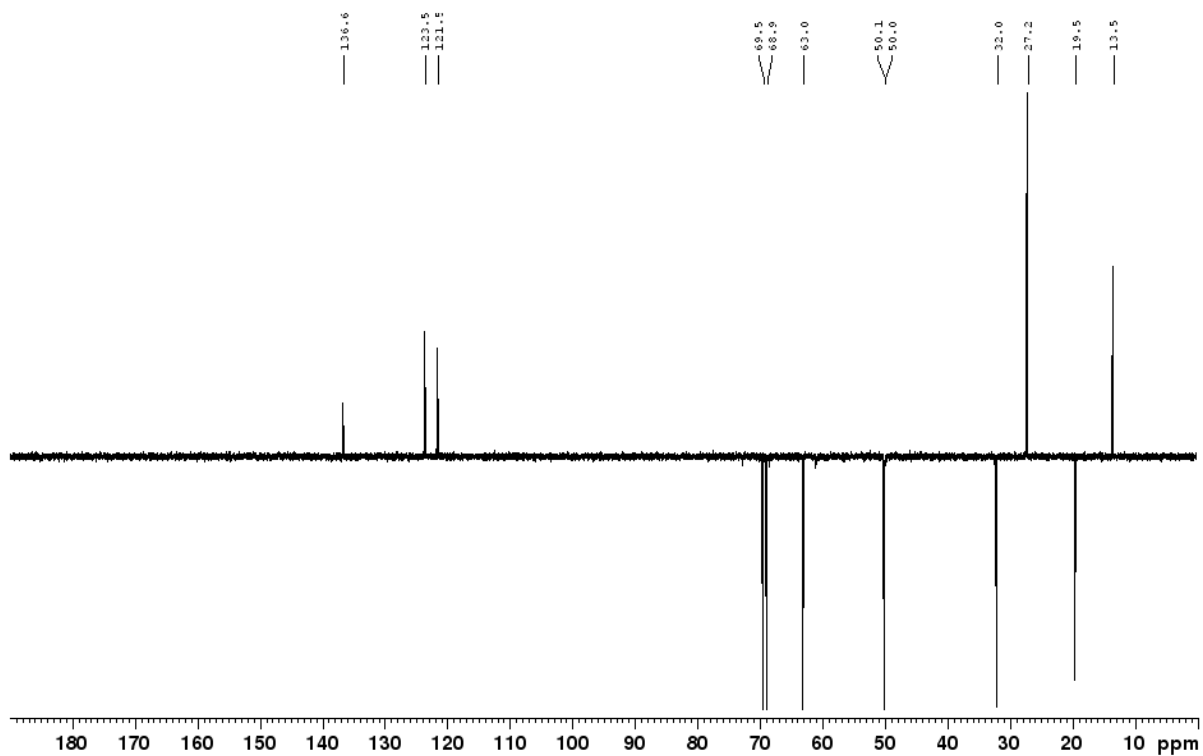

Figure 15: DEPT-135-spectrum of 4a.

## 6. NMR spectra of 4b

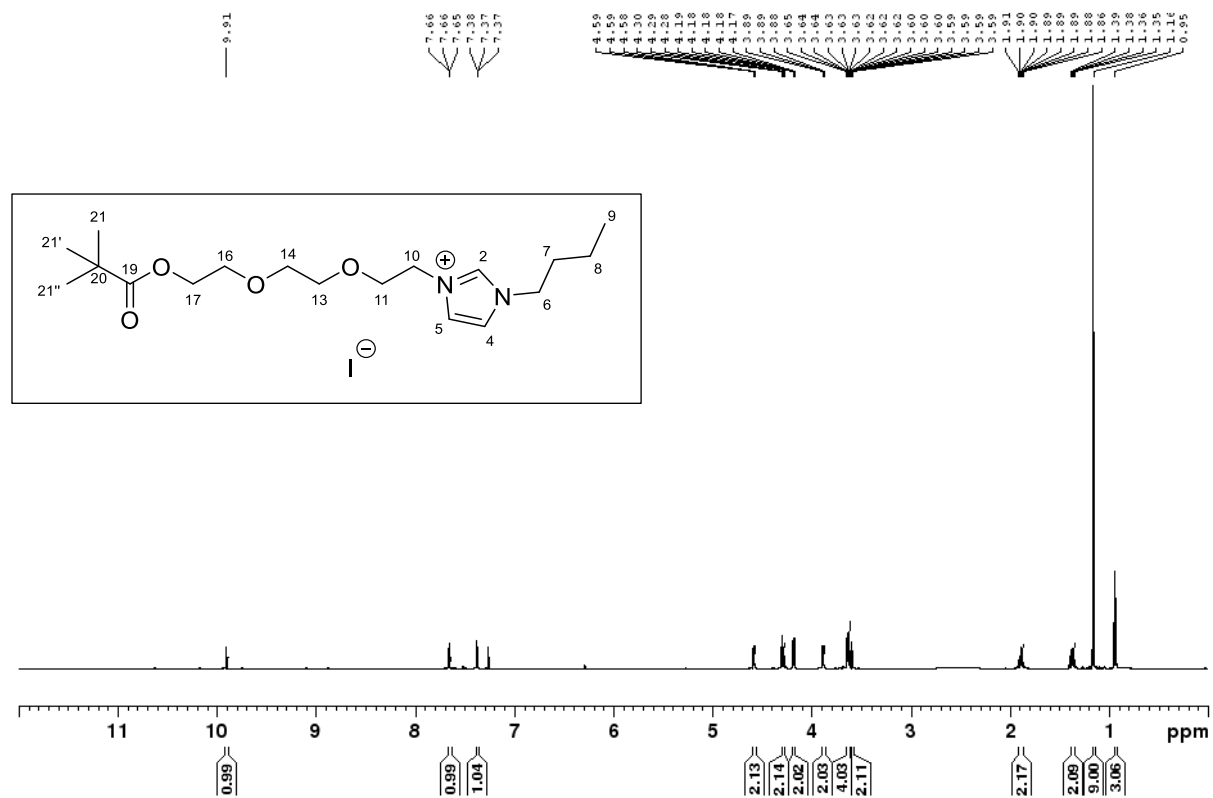

Figure 16:  $^1\text{H}$ -NMR of 4b.

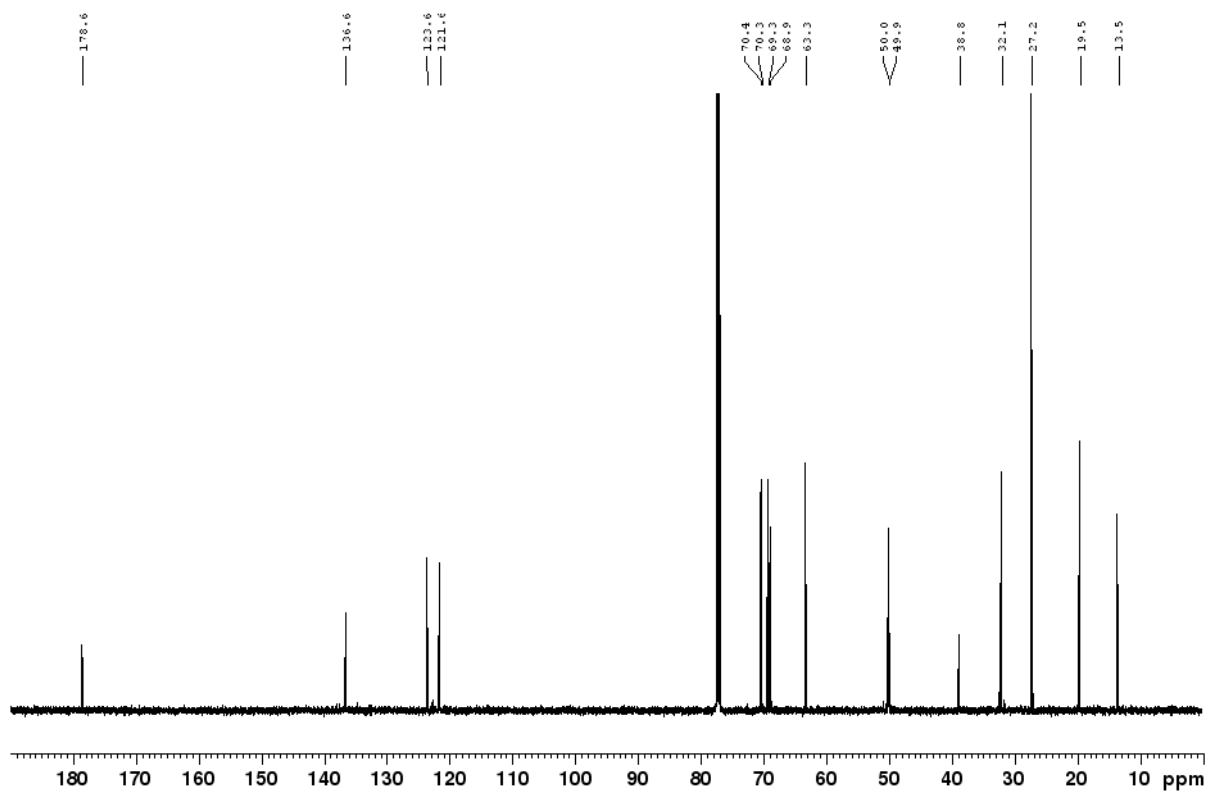

Figure 17:  $^{13}\text{C}$ -NMR of 4b.

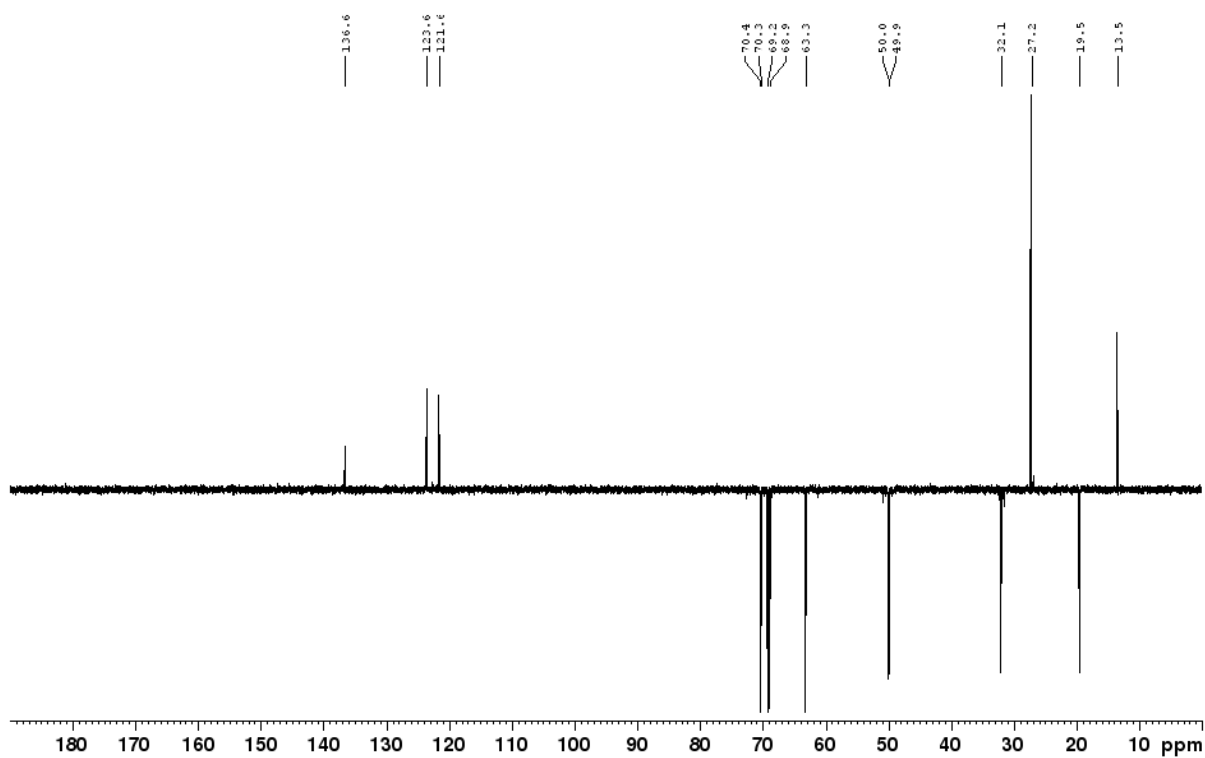

Figure 18: DEPT-135-spectrum of 4b.

## 7. NMR spectra of 5a

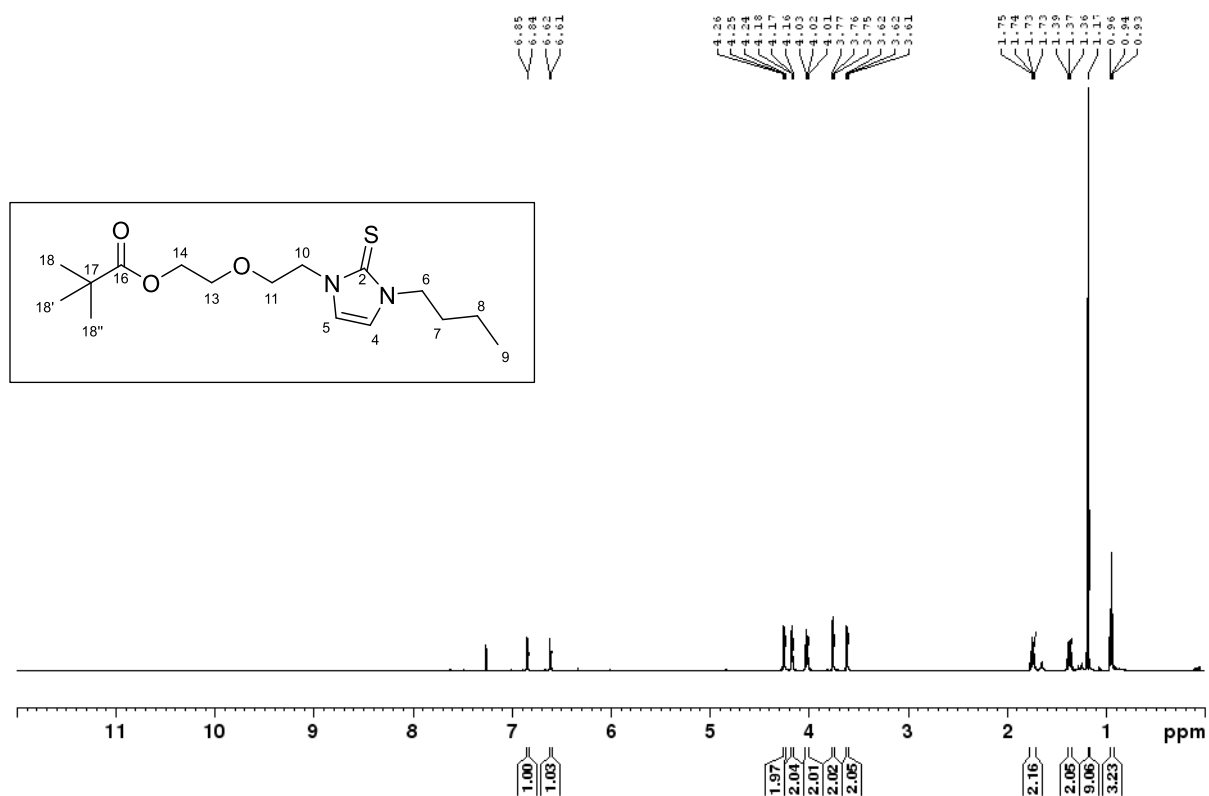

Figure 19: <sup>1</sup>H-NMR of 5a.

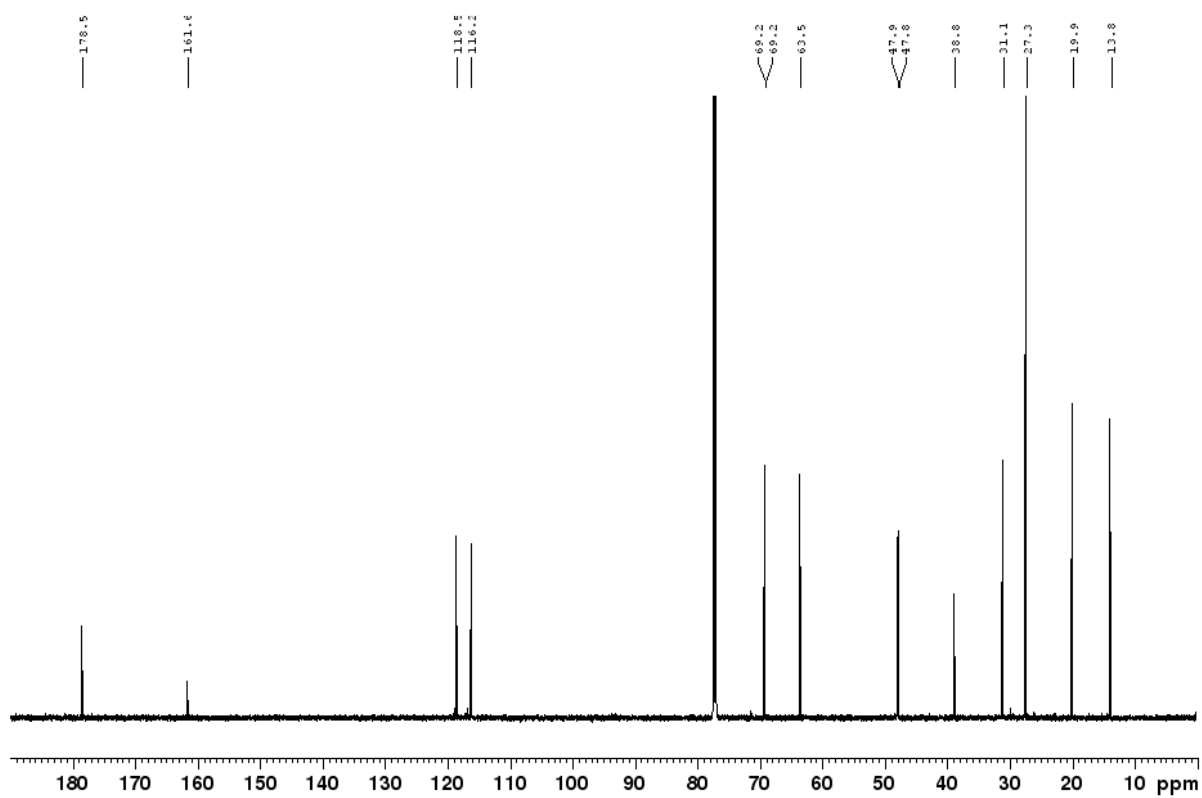

Figure 20: <sup>13</sup>C-NMR of 5a.

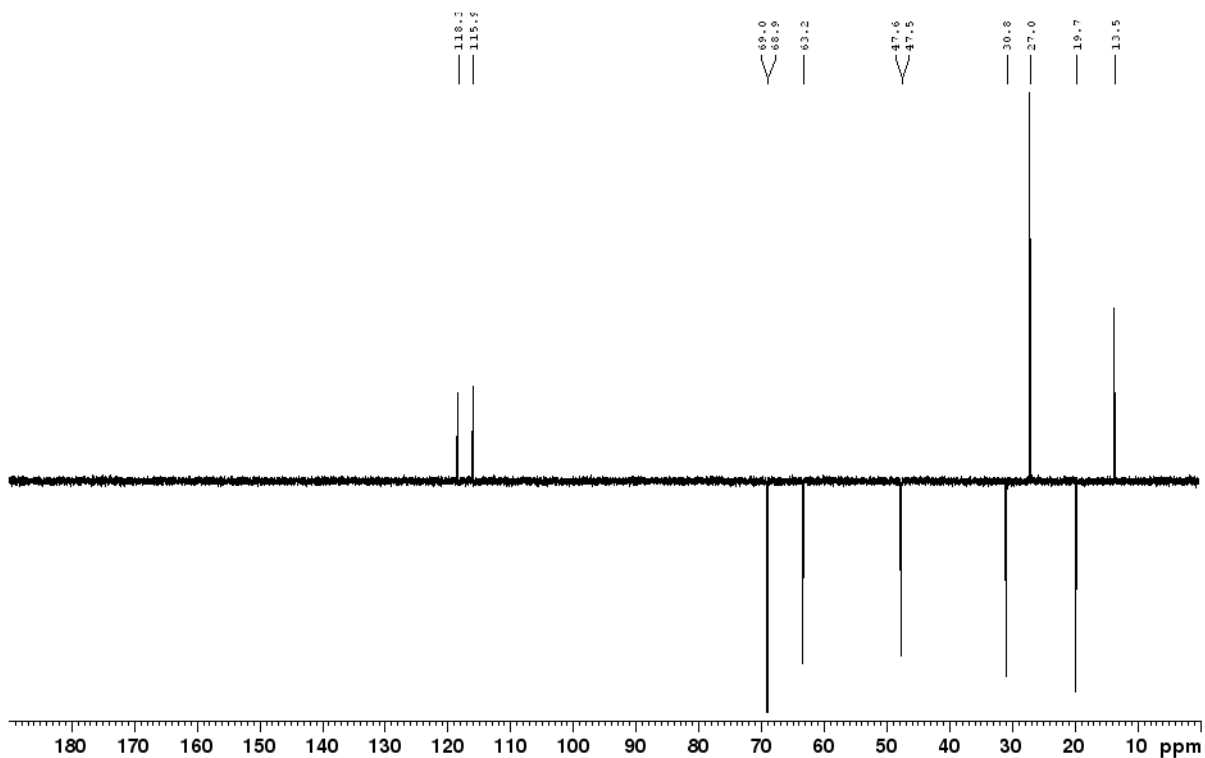

Figure 21: DEPT-135-spectrum of 5a.

## 8. NMR spectra of 5b

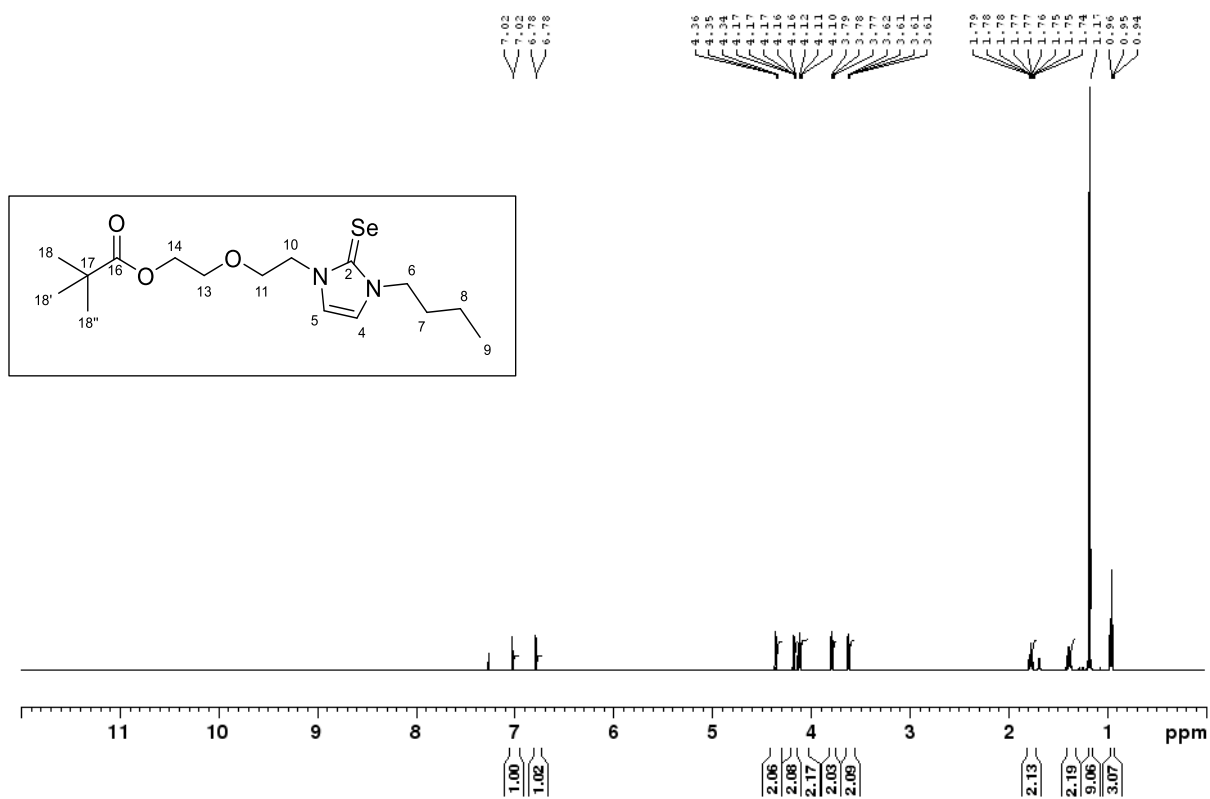

Figure 22: <sup>1</sup>H-NMR of 5b.

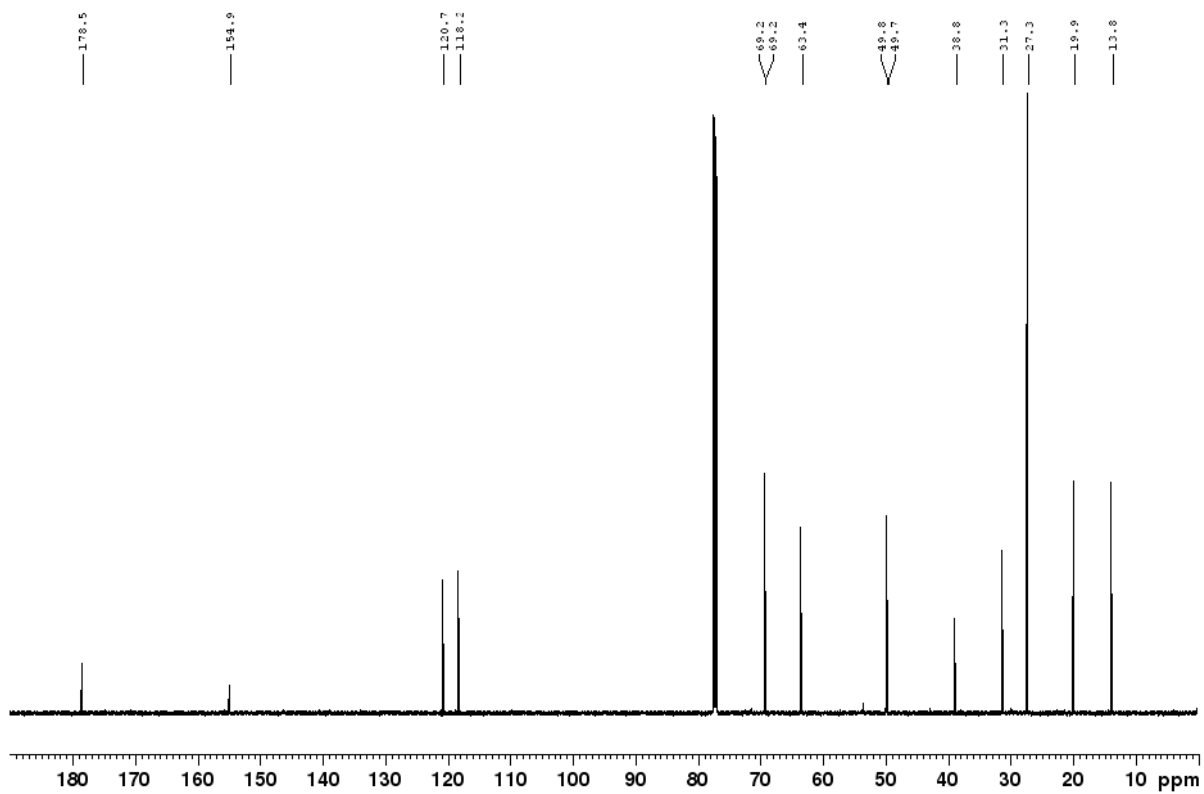

Figure 23:  $^{13}\text{C}$ -NMR of 5b.

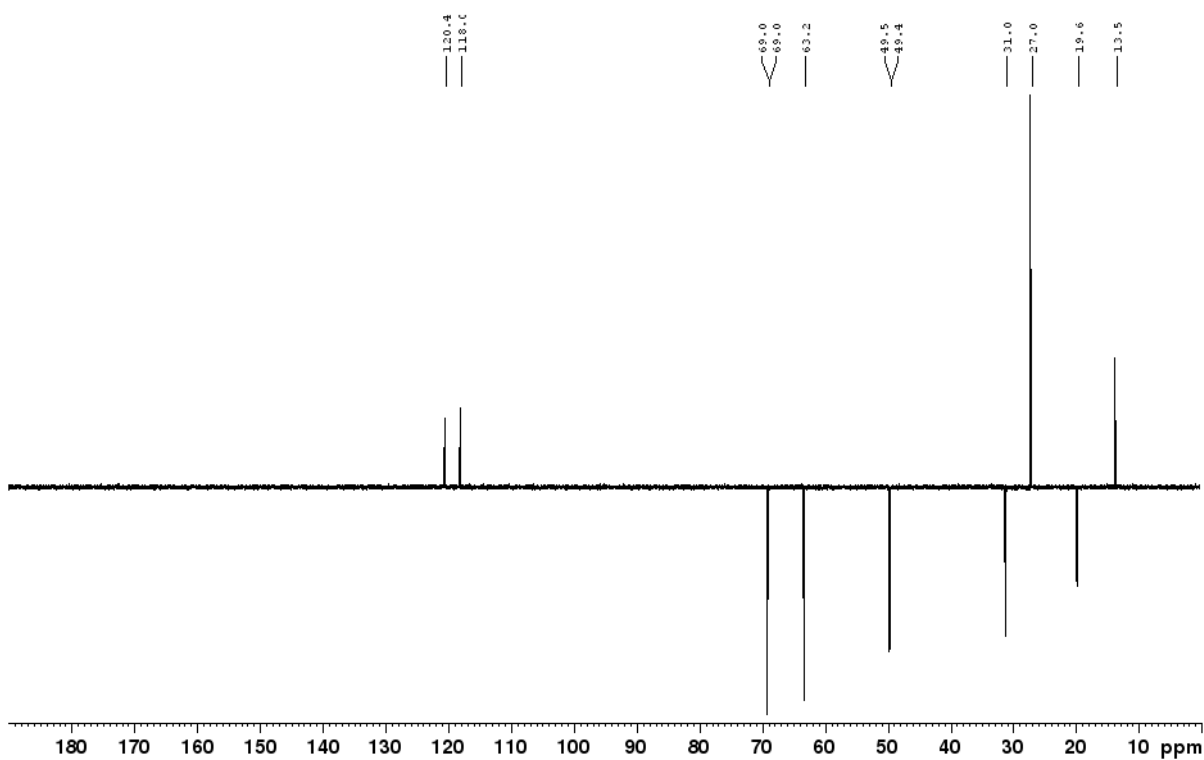

Figure 24: DEPT-135-spectrum of 5b.

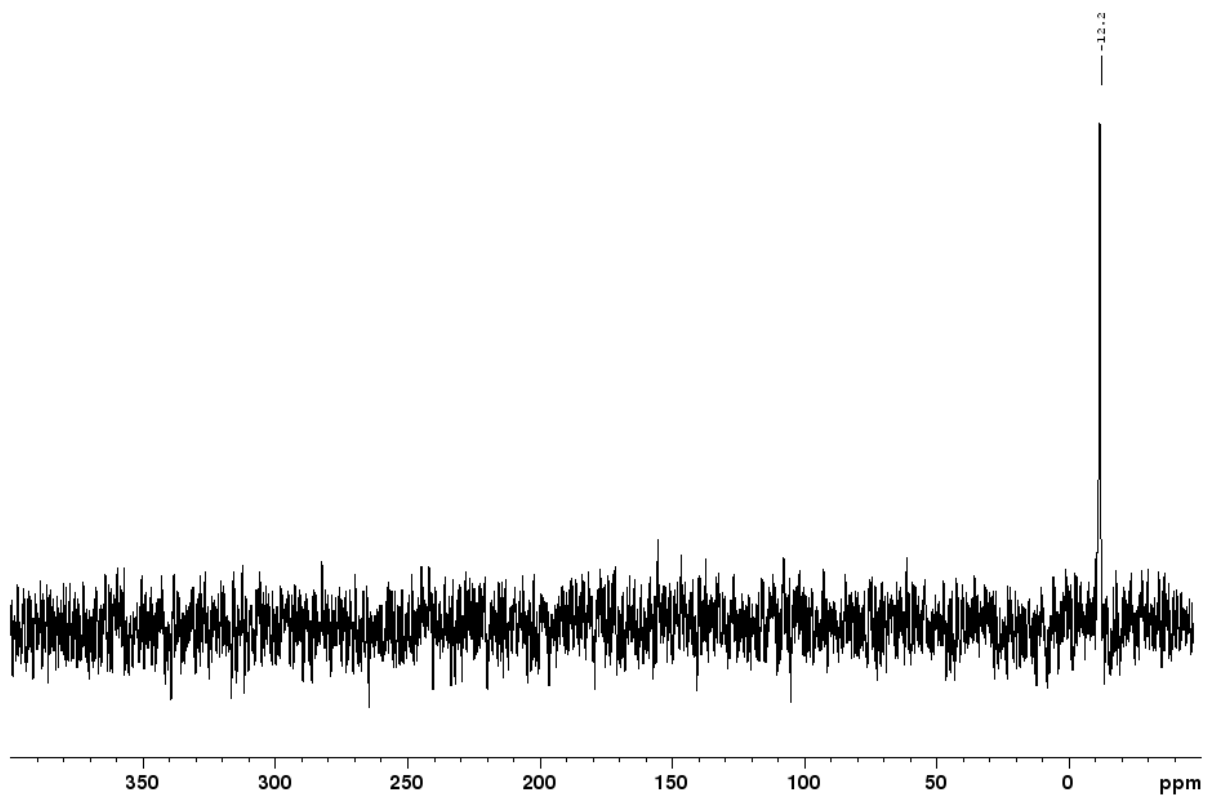

Figure 25:  $^{77}\text{Se}$ -NMR of 5b.

## 9. NMR spectra of 6a

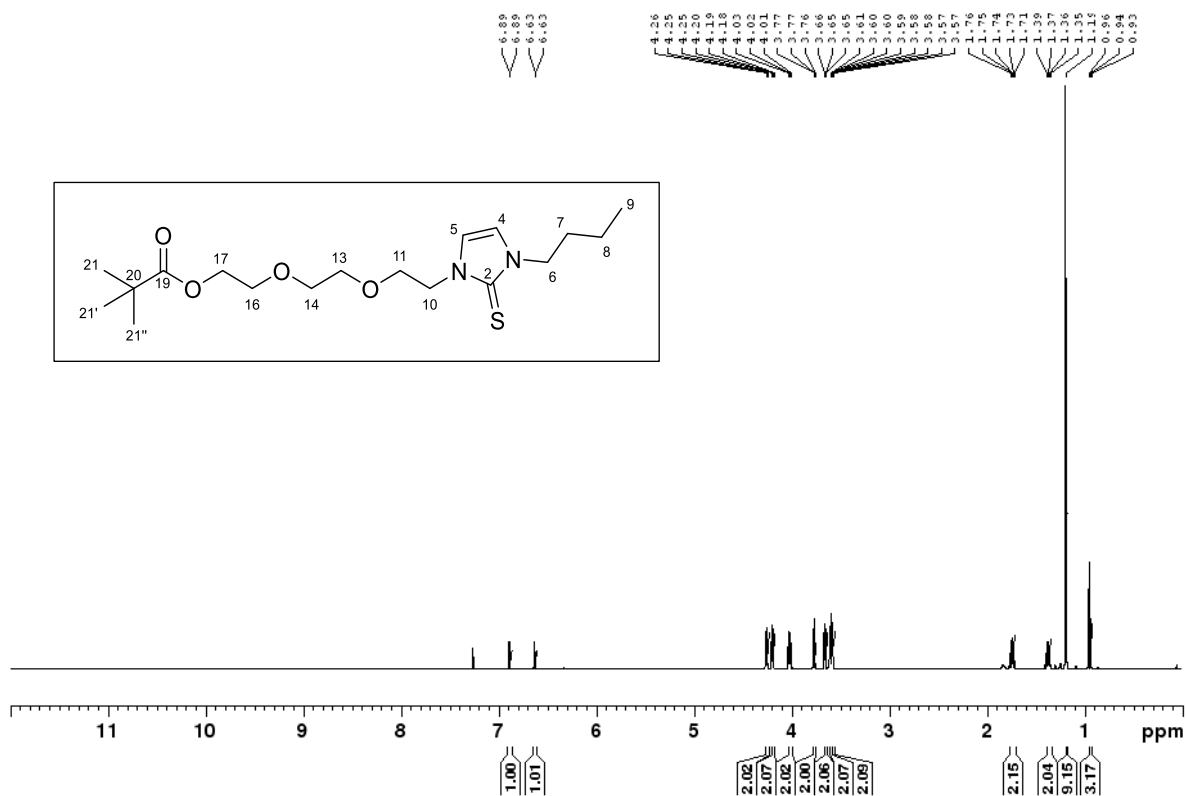

Figure 26: <sup>1</sup>H-NMR of 6a.

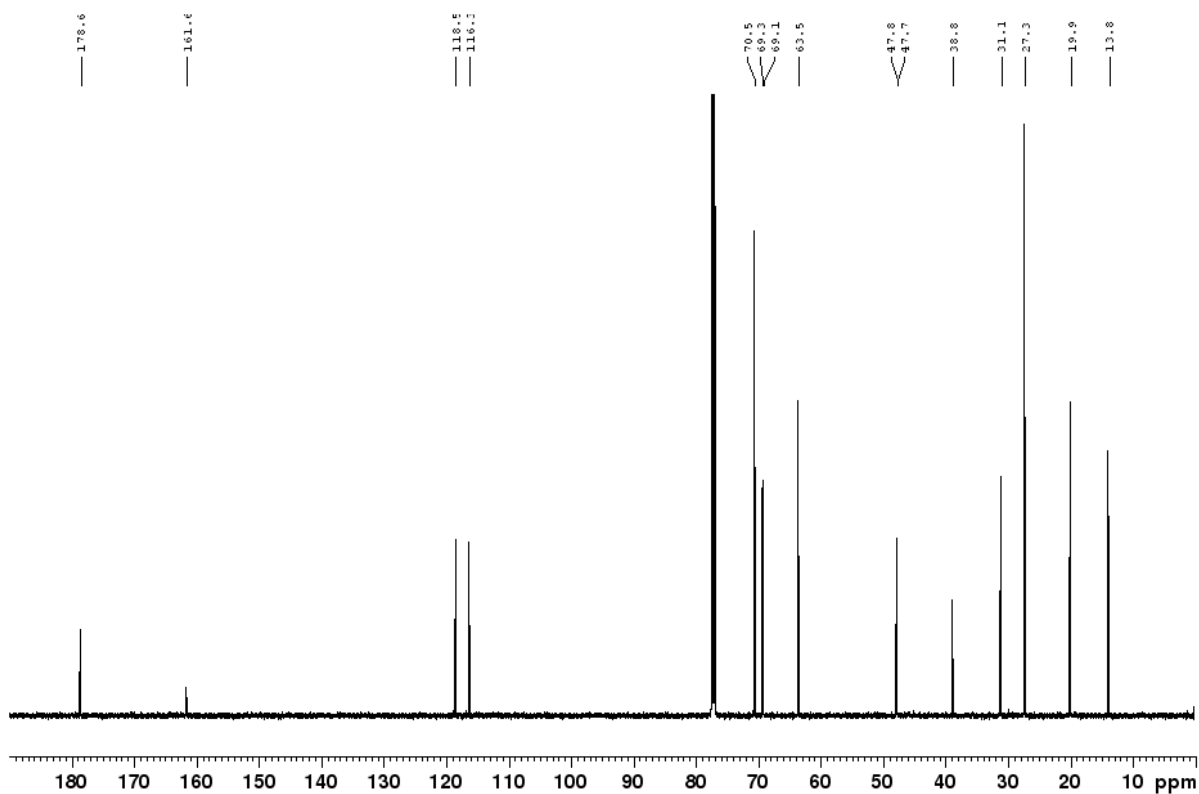

Figure 27: <sup>13</sup>C-NMR of 6a.

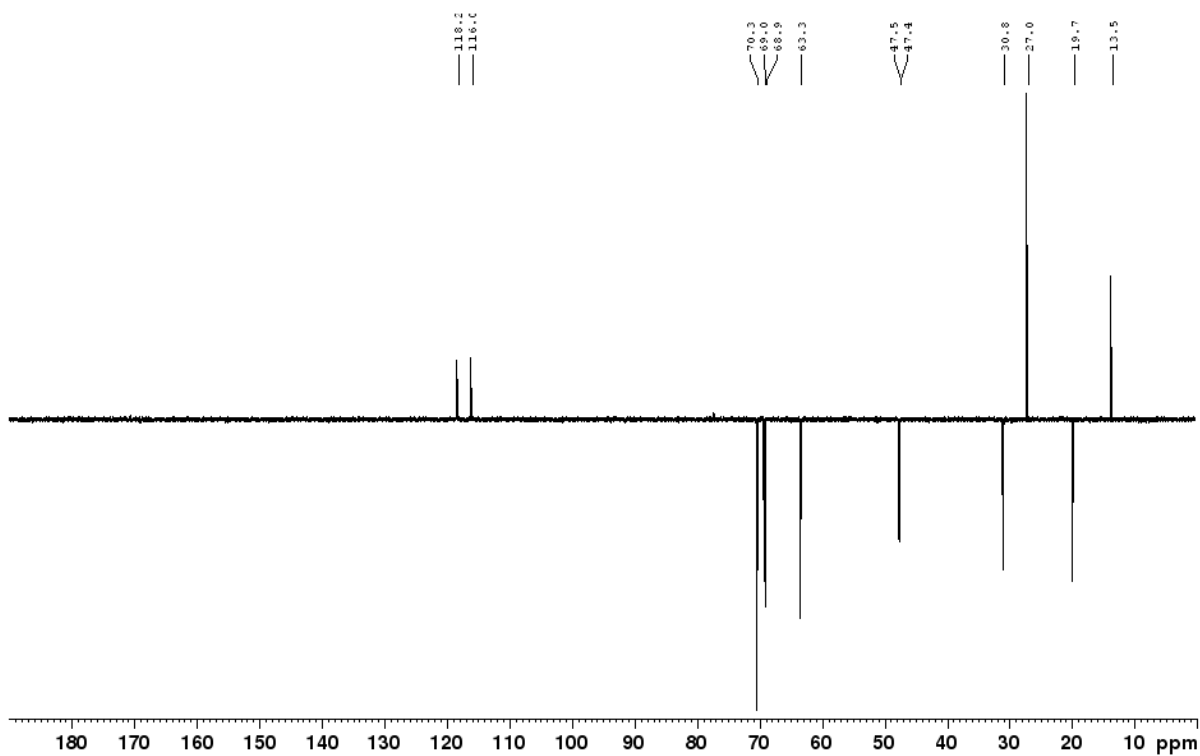

Figure 28: DEPT-135-spectrum of 6a.

## 10. NMR spectra of 6b

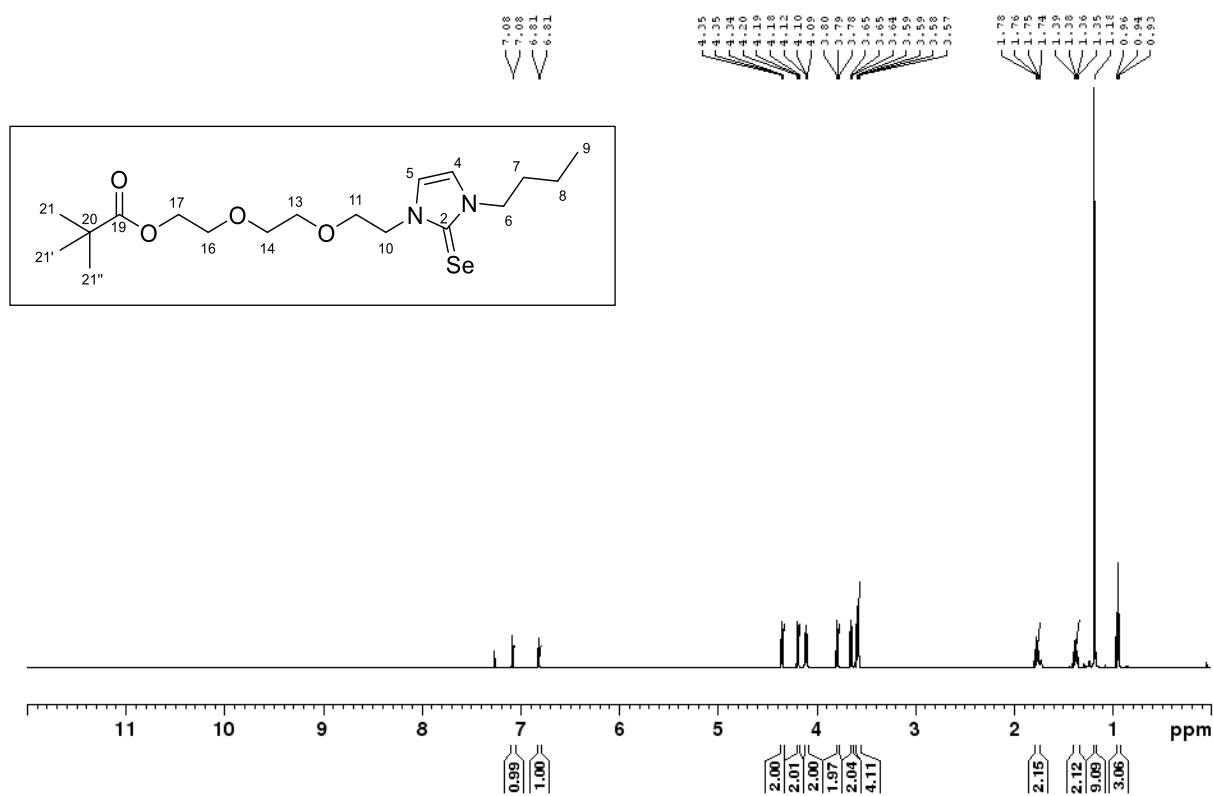

Figure 29:  $^1\text{H}$ -NMR of 6b.



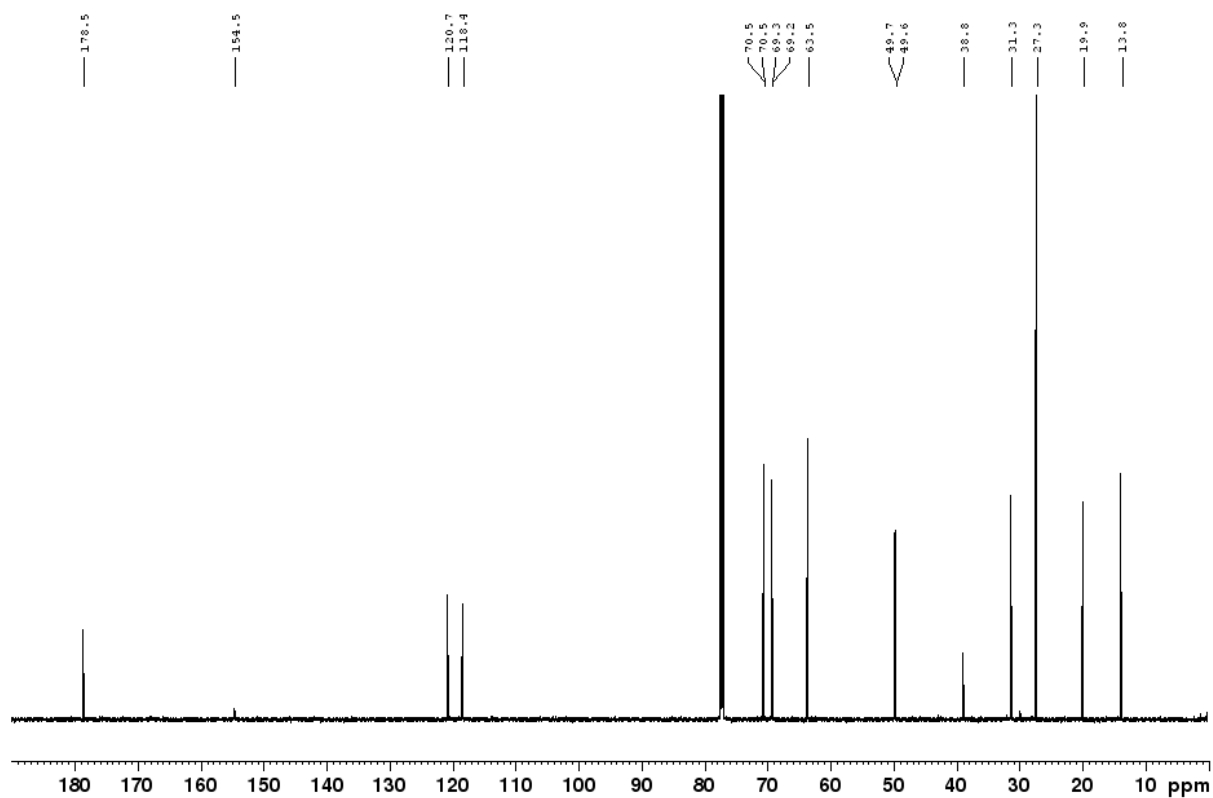

Figure 30:  $^{13}\text{C}$ -NMR of 6b.

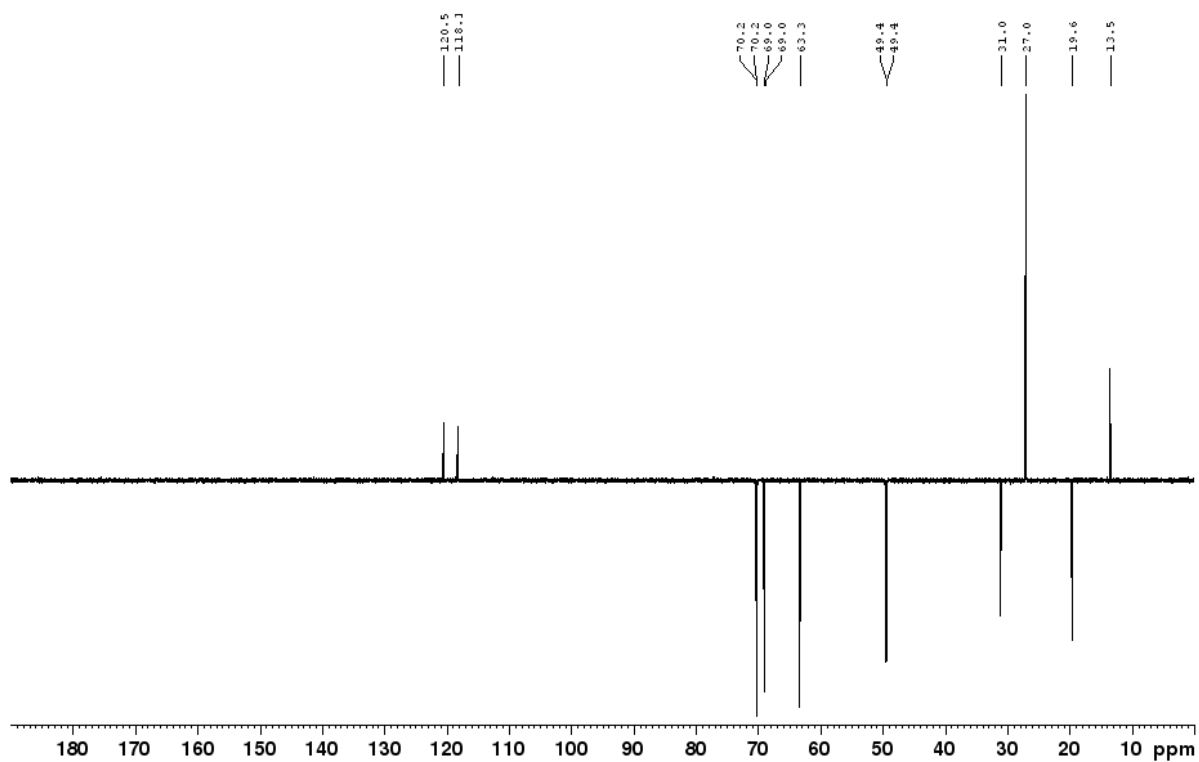

Figure 31: DEPT-135-spectrum of 6b.

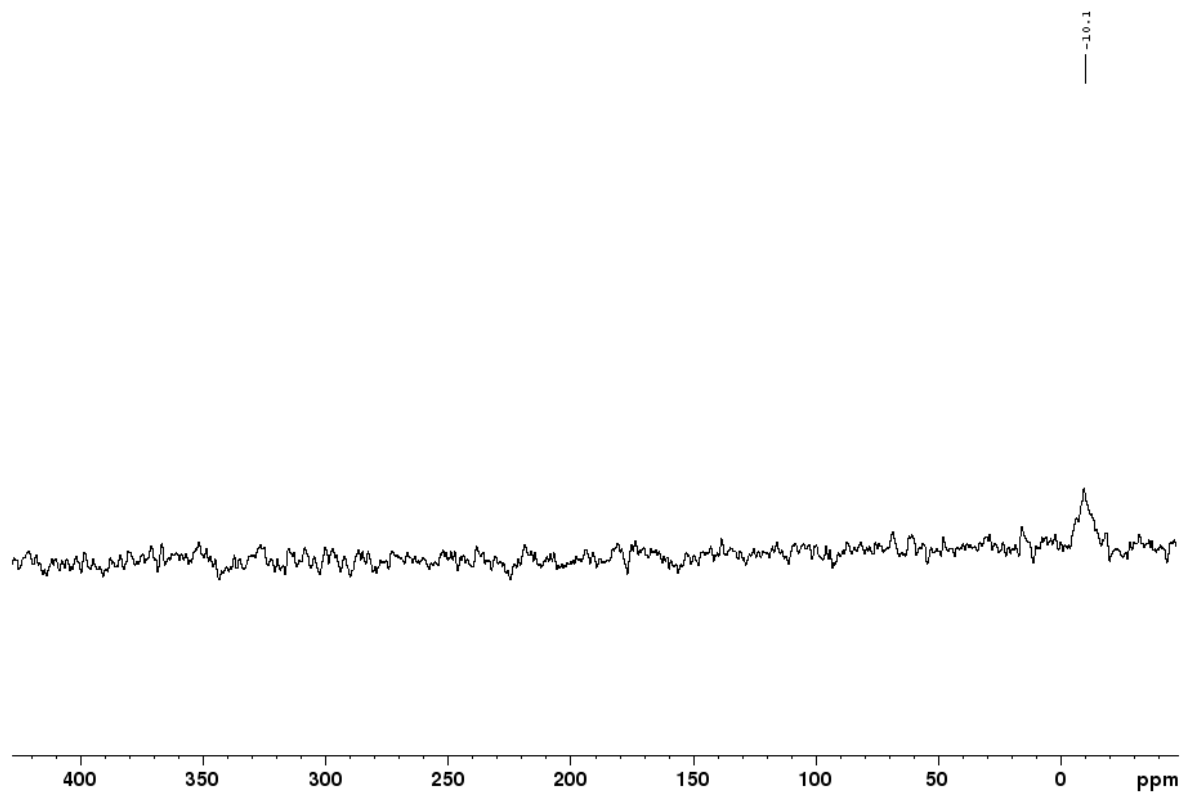

Figure 32:  $^{77}\text{Se}$ -NMR of 6b.

## 11. NMR spectra of 7a

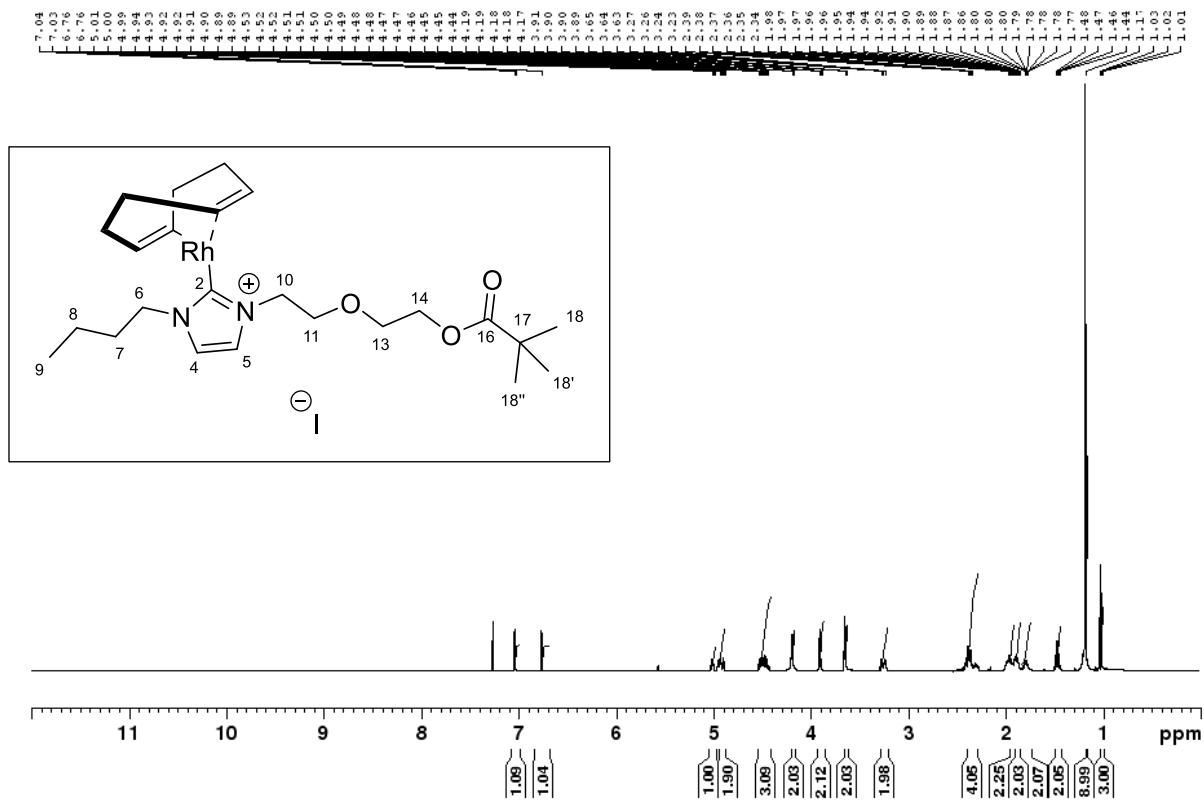

Figure 33:  $^1\text{H}$ -NMR of 7a.

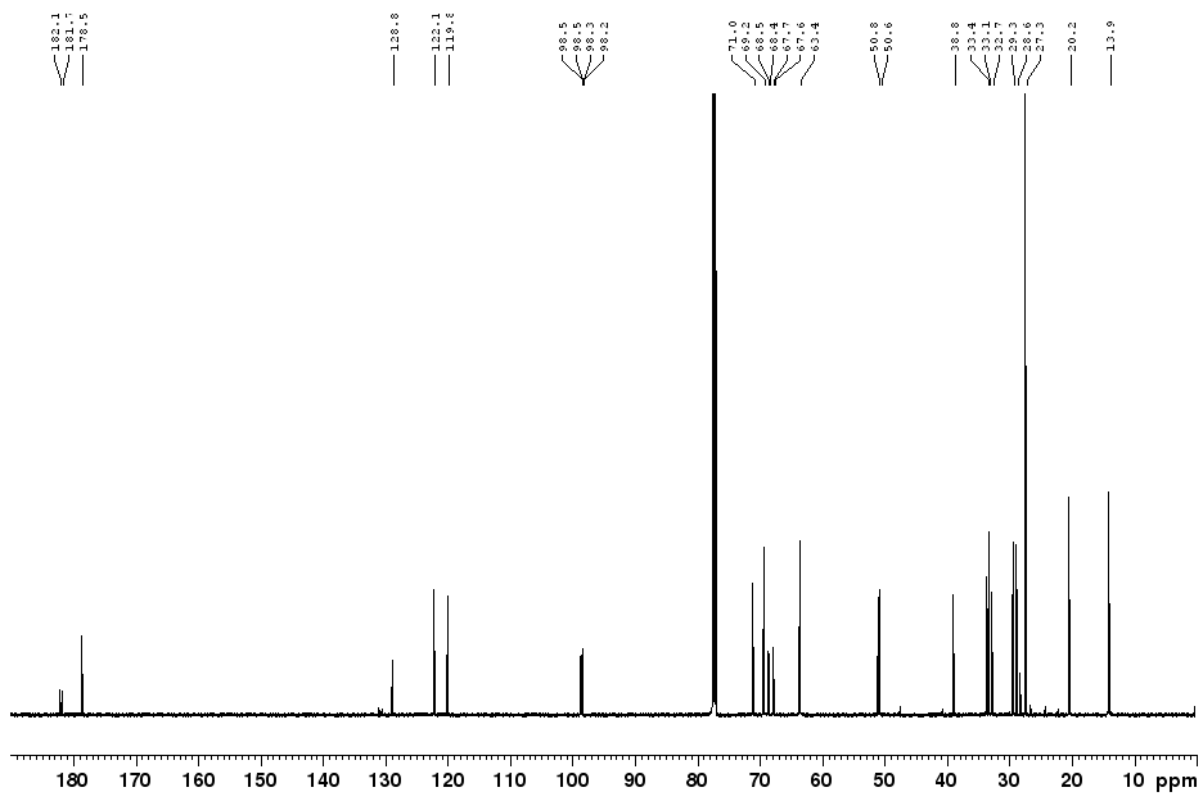

Figure 34:  $^{13}\text{C}$ -NMR of 7a.

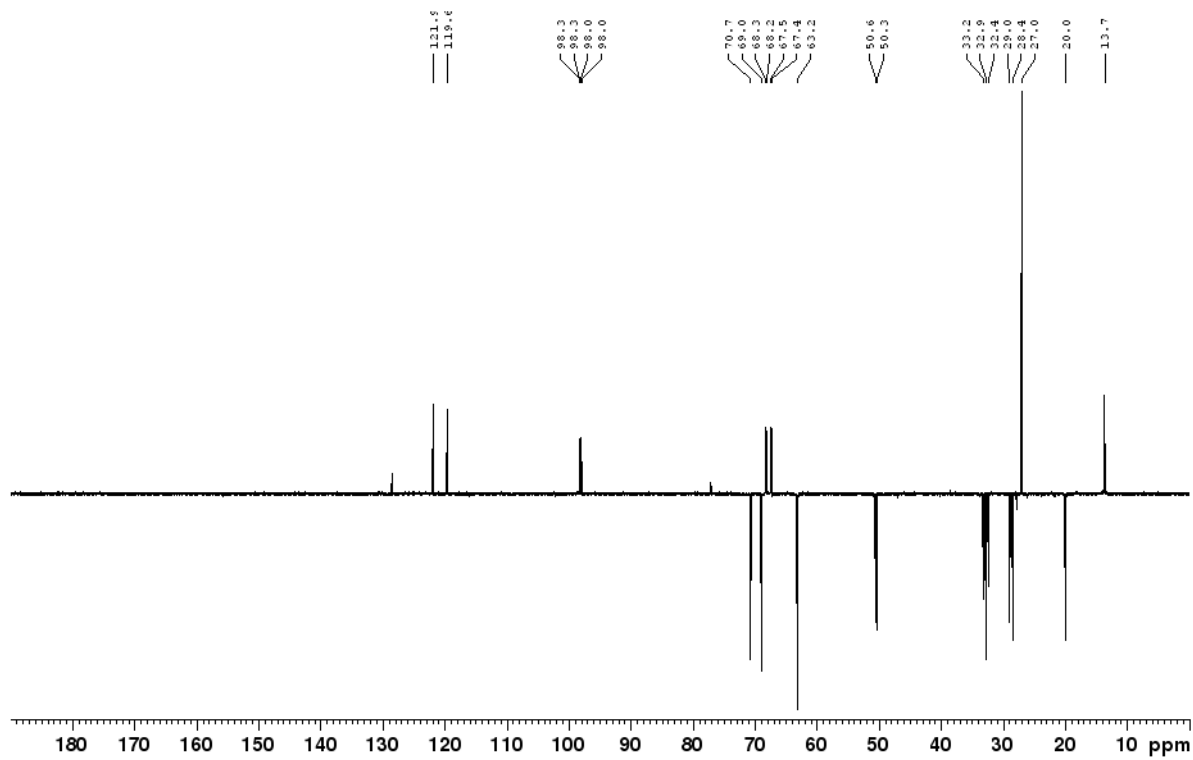

Figure 35: DEPT-135-spectrum of 7a.

## 12. NMR spectra of 7b

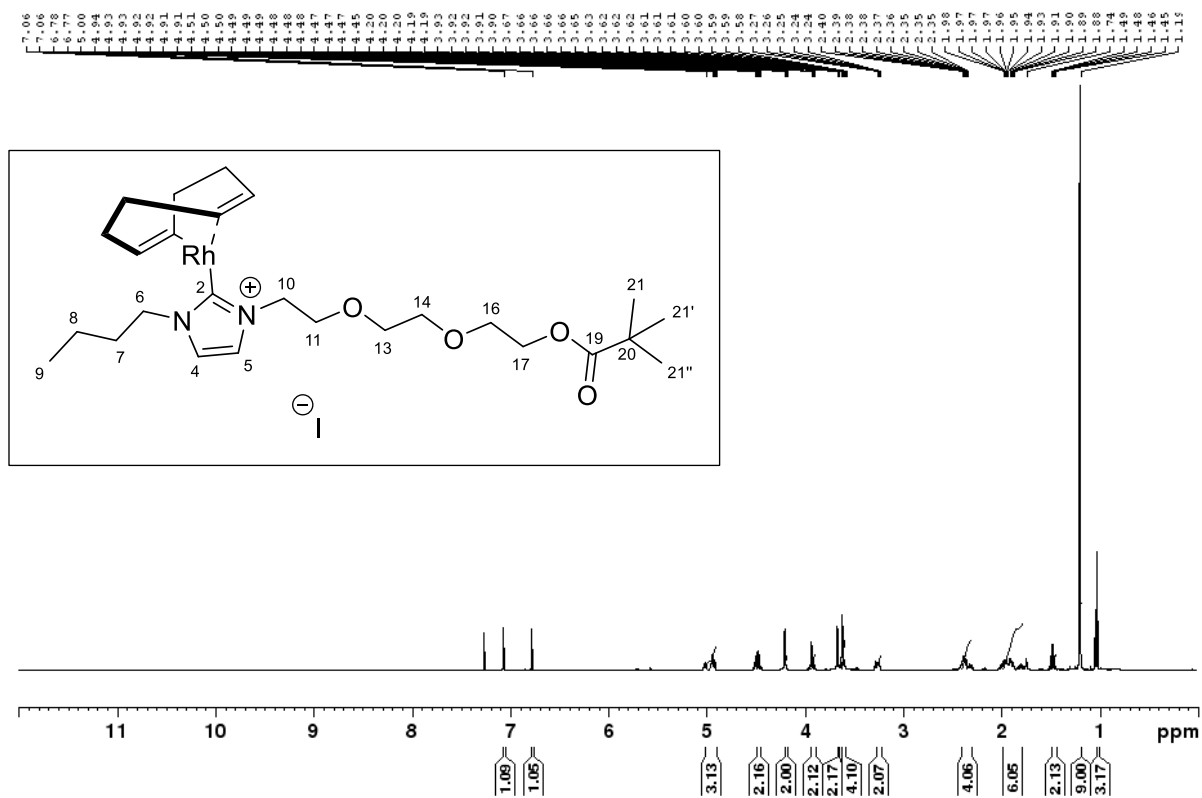

Figure 36: <sup>1</sup>H-NMR of 7b.

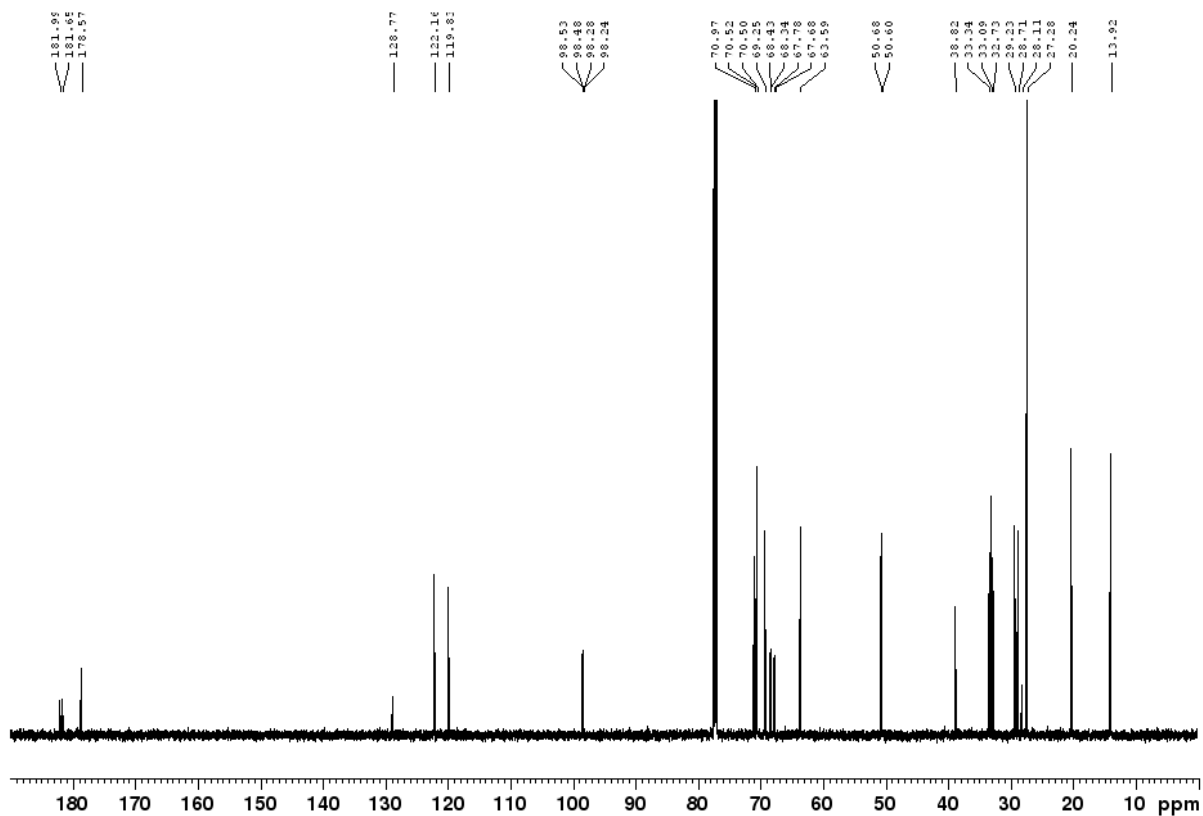

Figure 37: <sup>13</sup>C-NMR of 7b.

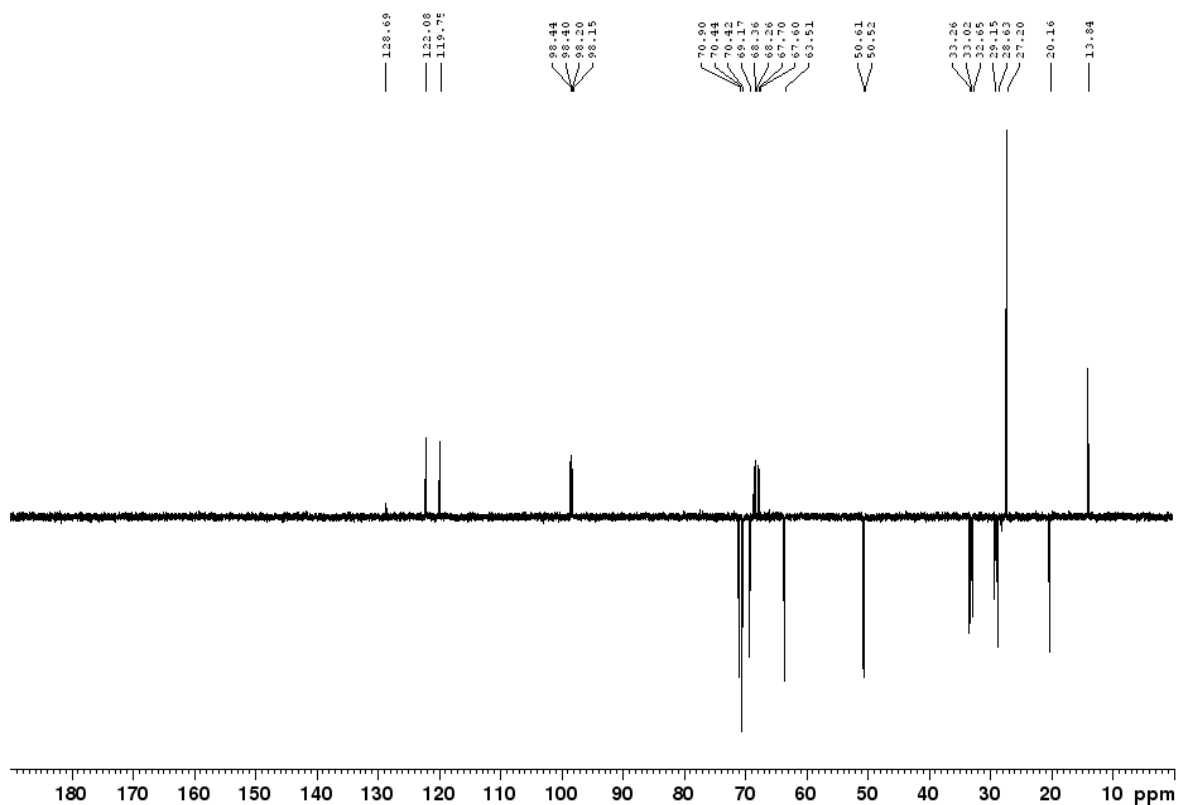

Figure 38: DEPT-135-spectrum of 7b.

### 13. NMR spectra of 8a

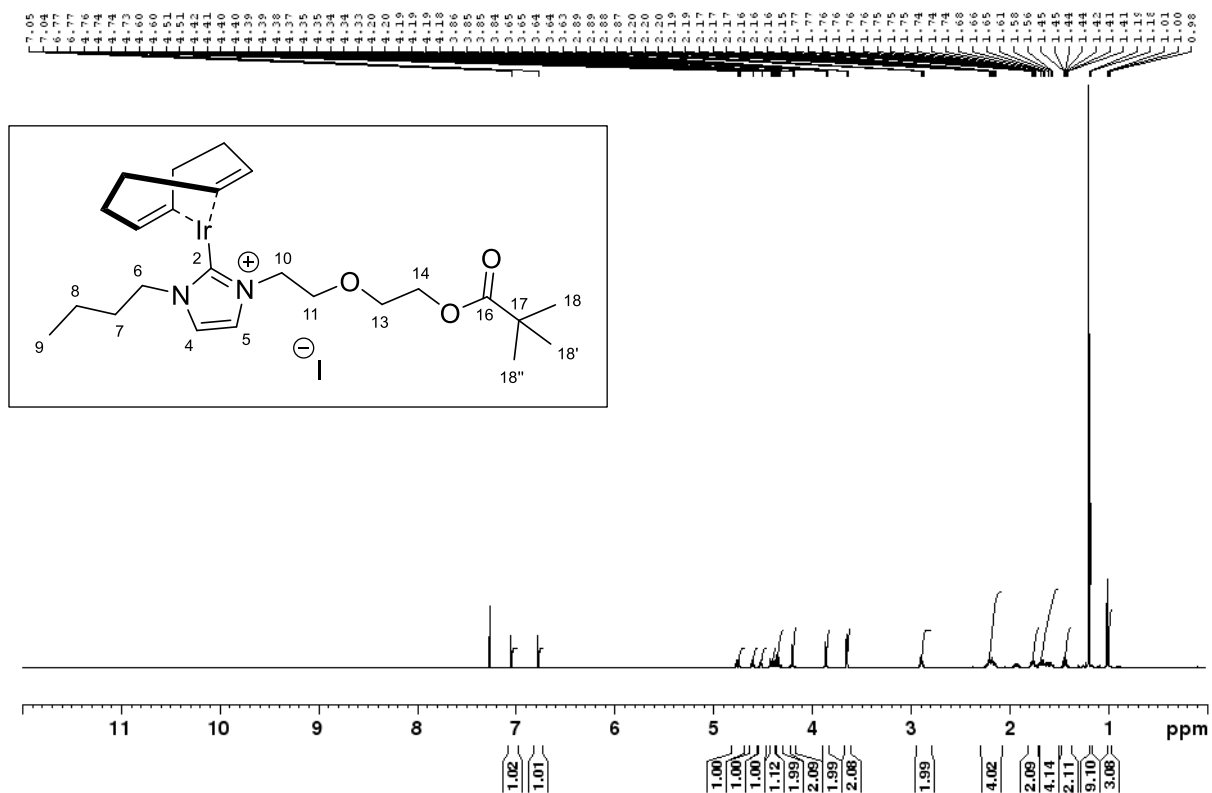

Figure 39:  $^1\text{H}$ -NMR of 8a.

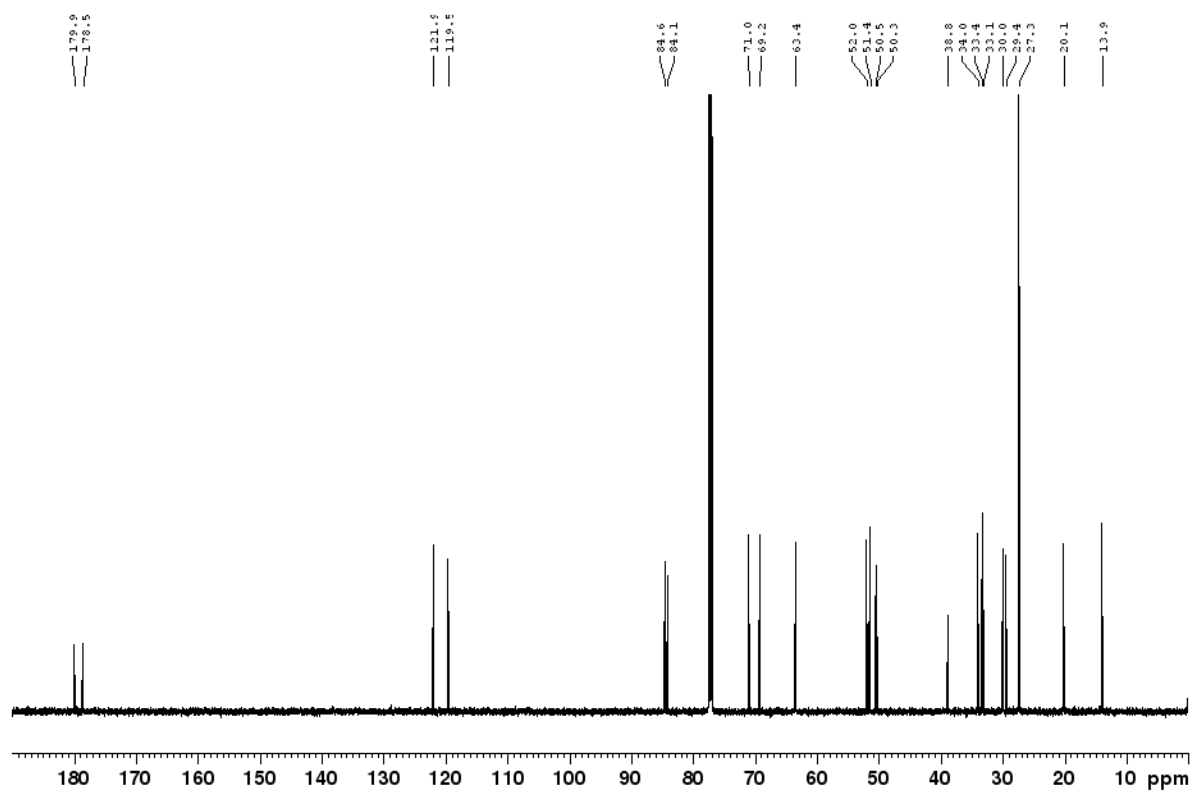

Figure 40:  $^{13}\text{C}$ -NMR of 8a.

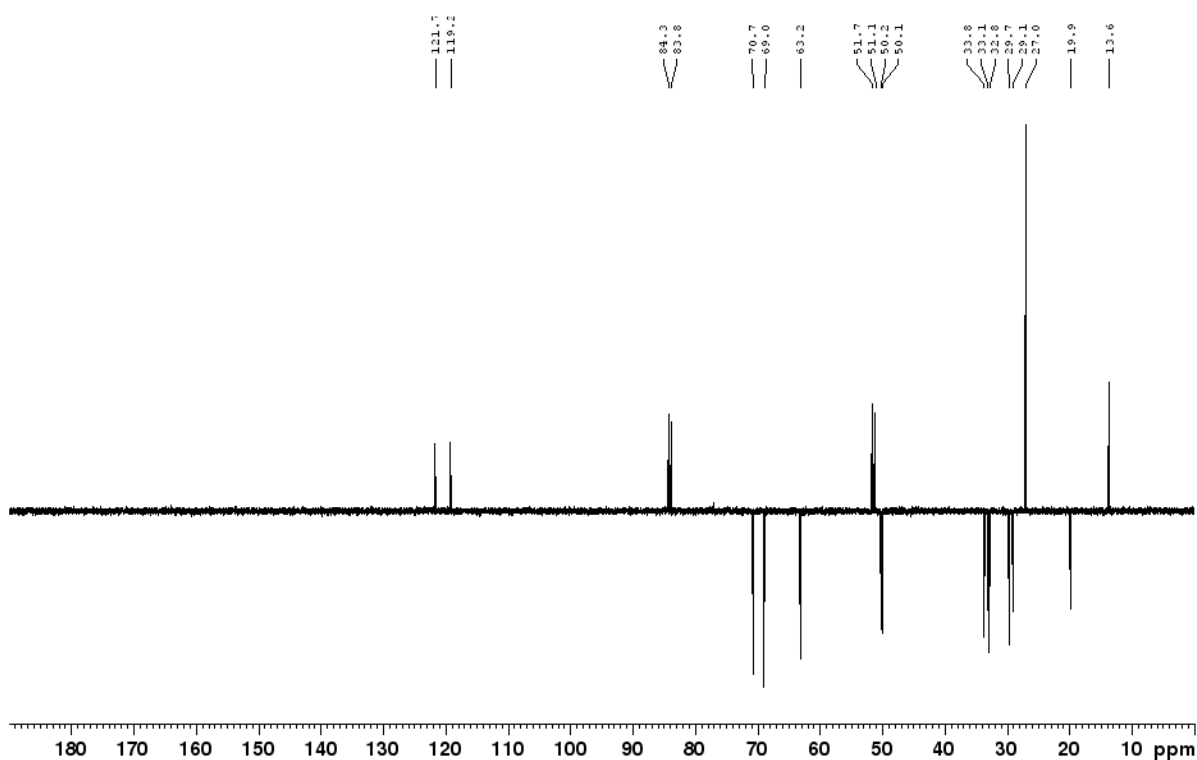

Figure 41: DEPT-135-spectrum of 8a.

## 14. NMR spectra of 8b

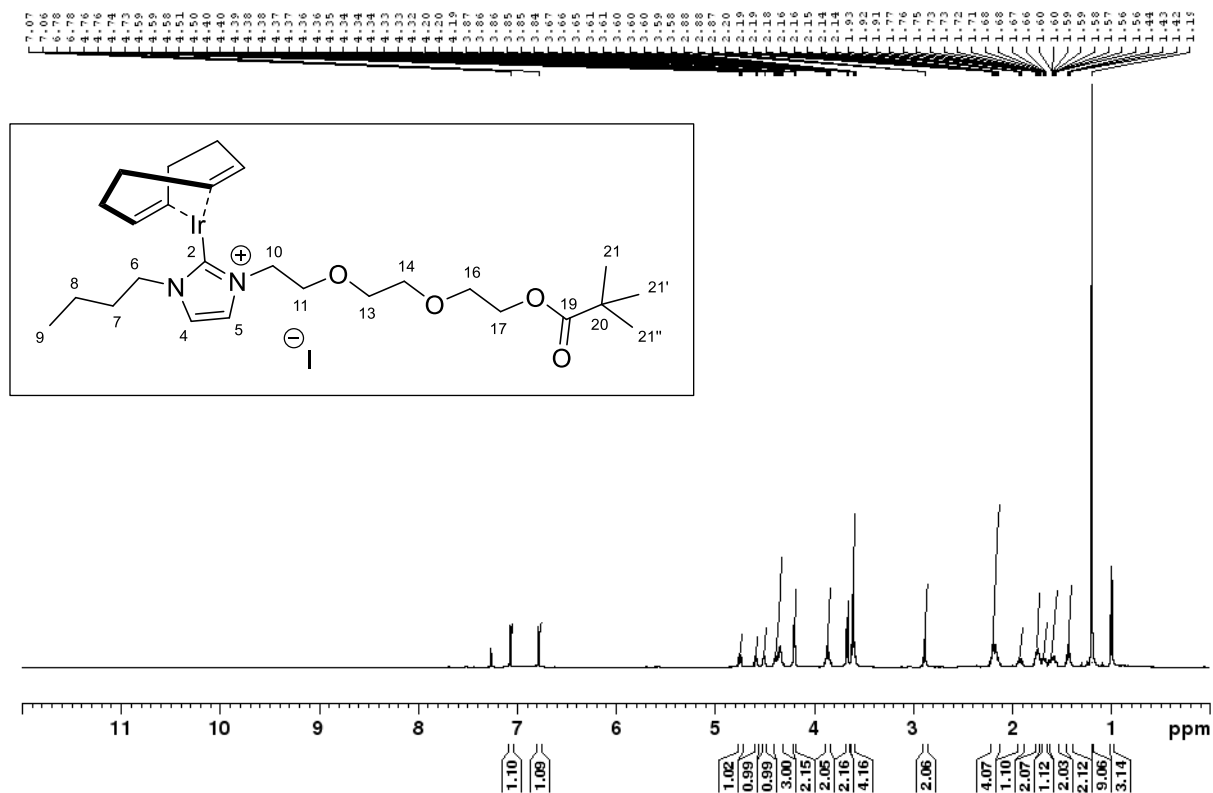

Figure 42: <sup>1</sup>H-NMR of 8b.

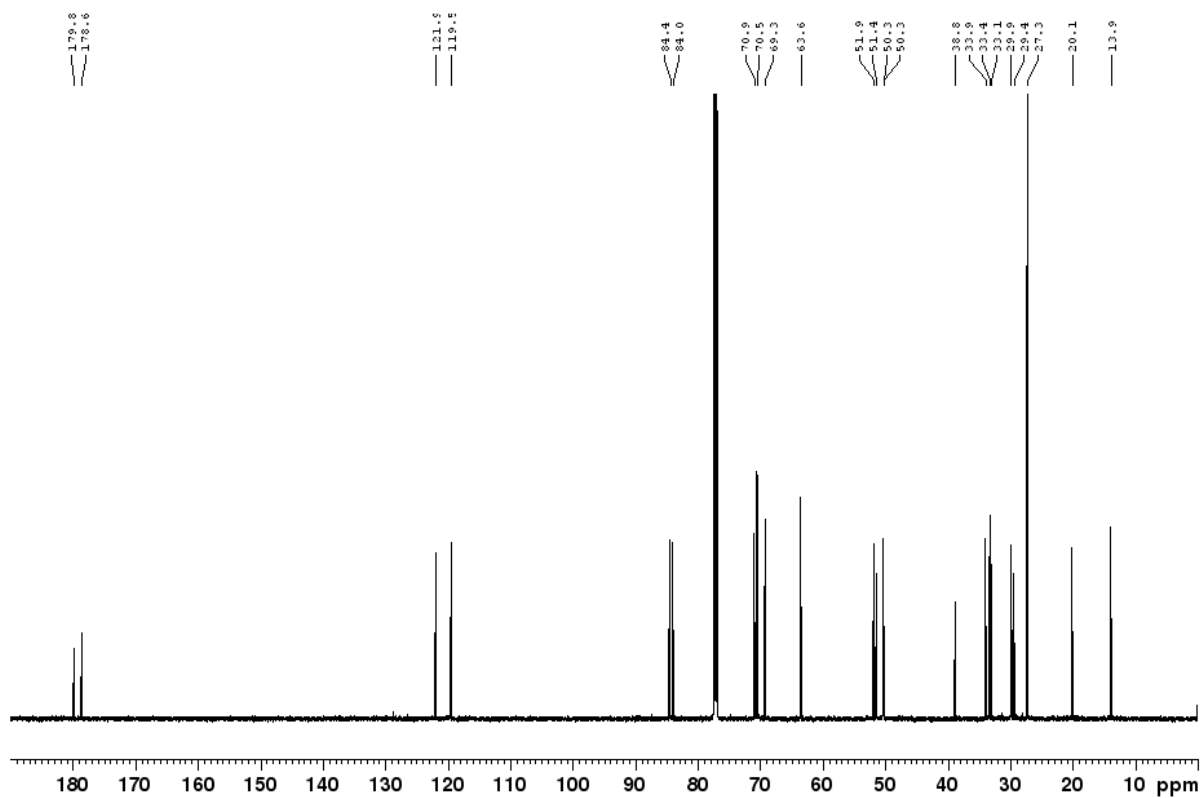

Figure 43: <sup>13</sup>C-NMR of 8b.

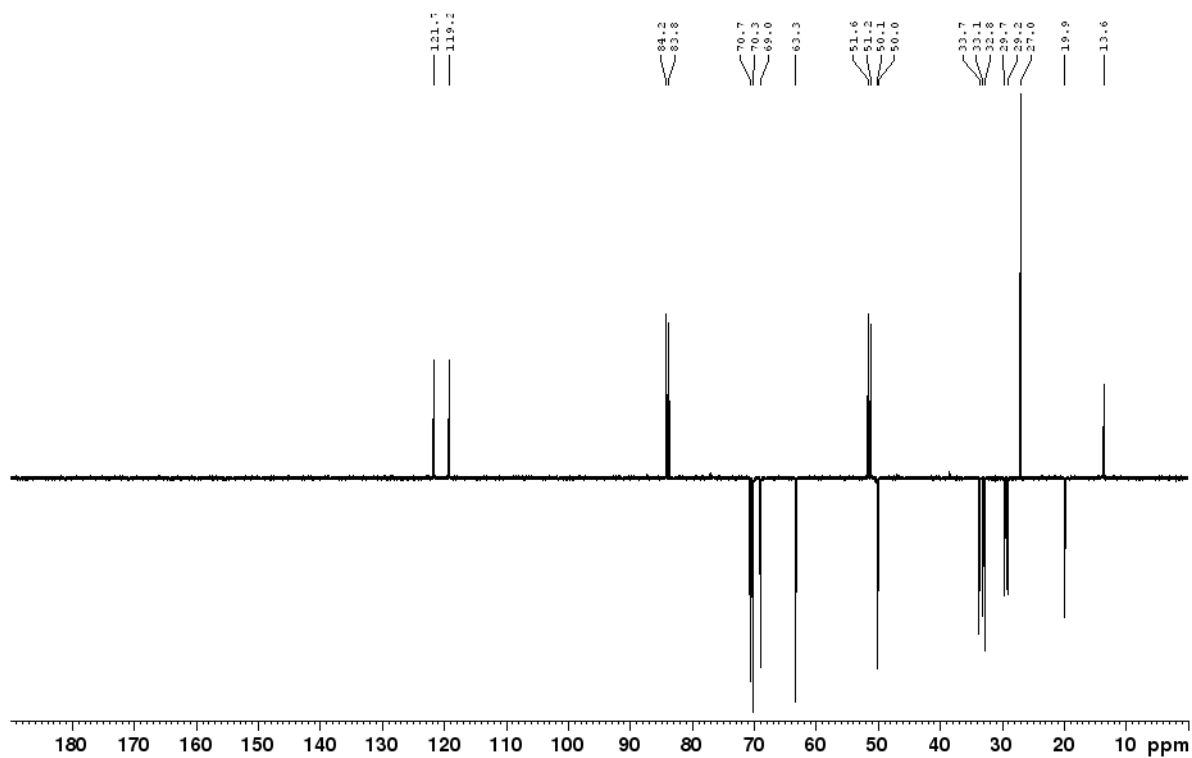

Figure 44: DEPT-135-spectrum of 8b.

## 15. NMR-Experiment for proof of carbene

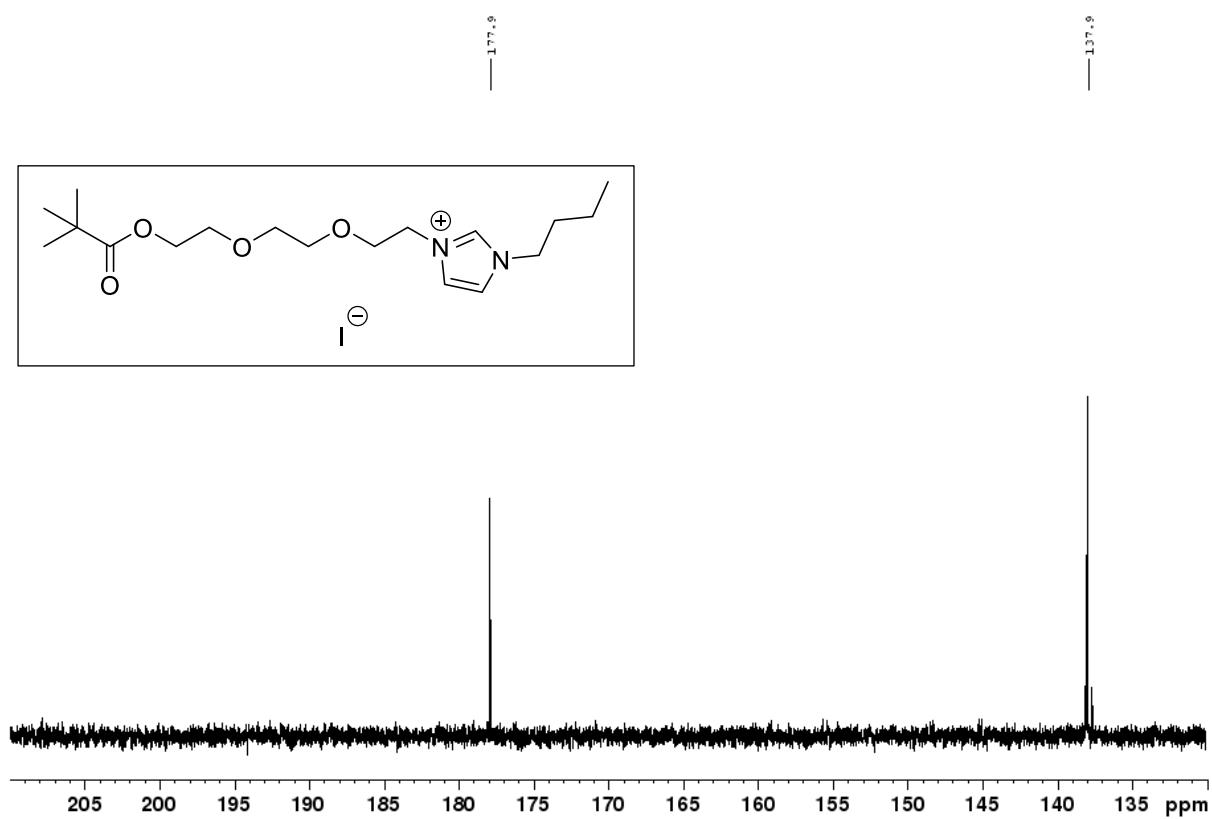

Figure 45:  $^{13}\text{C}$ -NMR of 4b.



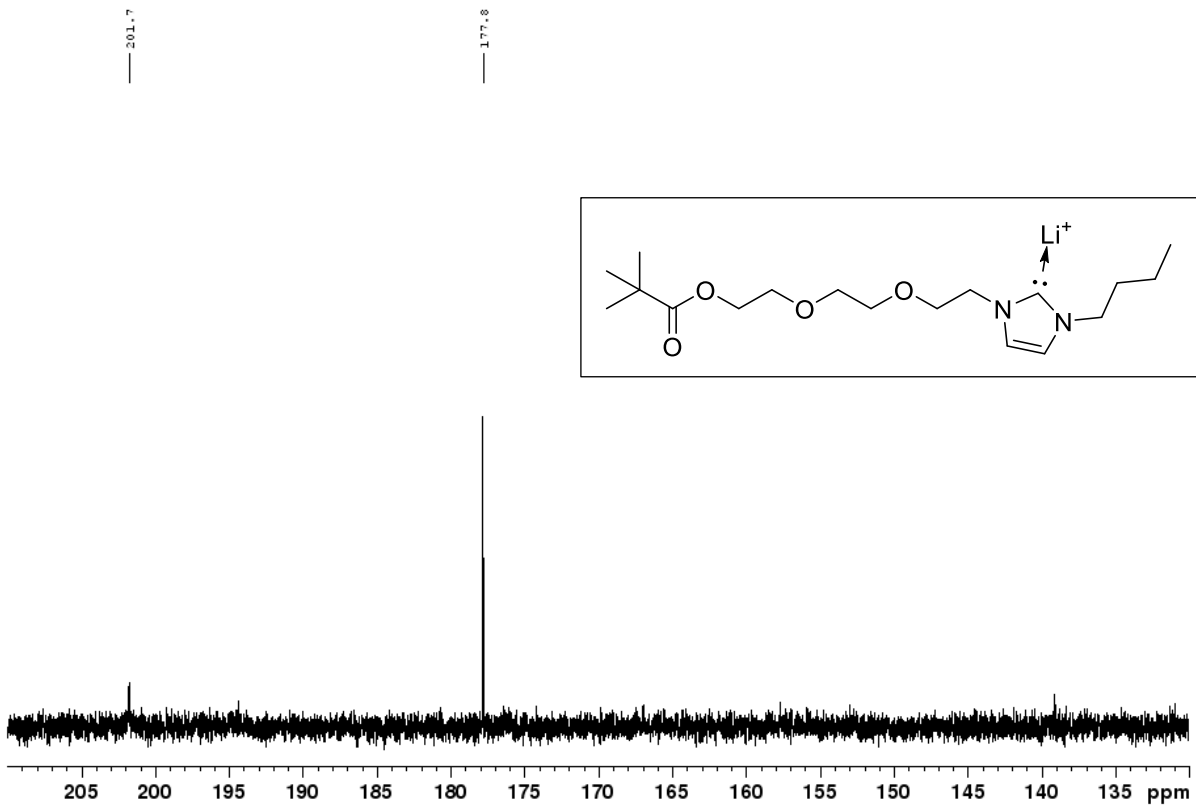

Figure 46:  $^{13}\text{C}$ -NMR of the carbene (4aA/4bA).

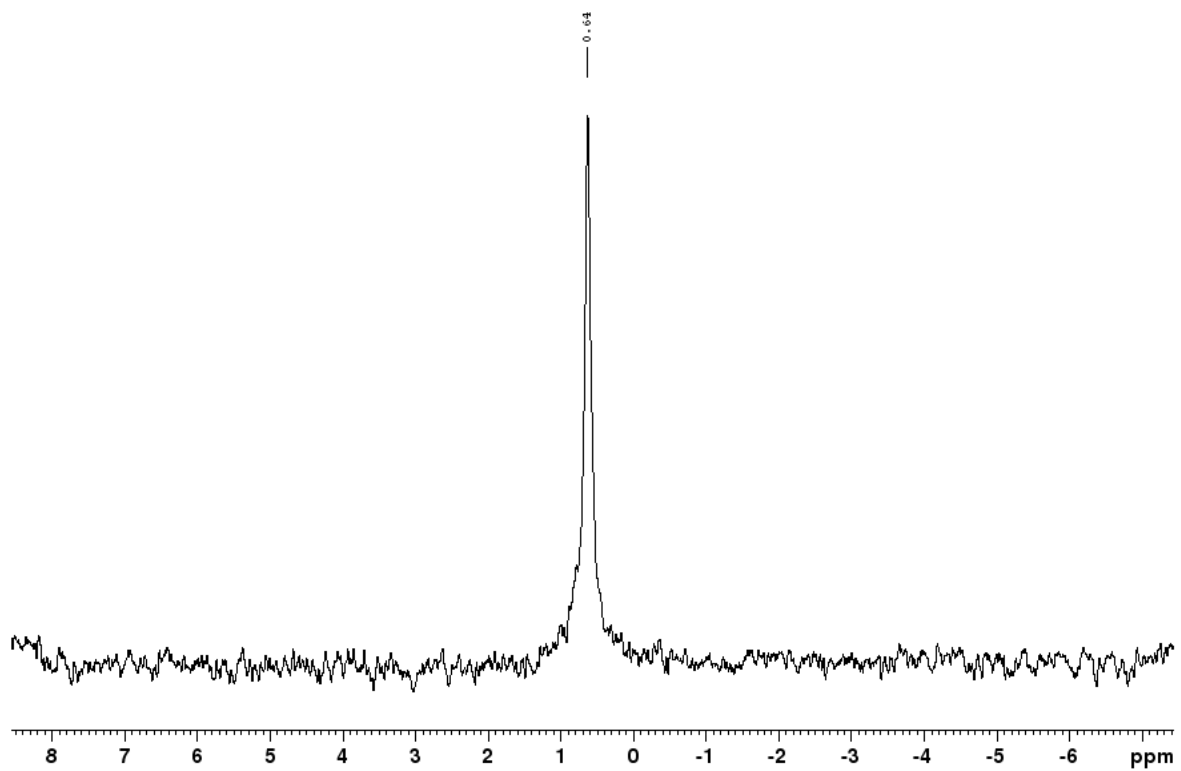

Figure 47:  $^7\text{Li}$ -NMR of the carbene (4aA/4bA).

## 16. HOMO/LUMO calculations

### DFT calculations (HOMO/LUMO coefficients and orbital energies, CREF value)

HOMO-LUMO DFT calculations were performed using the Spartan Software (*Spartan'20*, Wavefunction, Inc., Irvine, CA. Available from: <http://www.wavefun.com>) running on a MS Windows 10 Pro PC system with an AMD Ryzen Threadripper 3970X 32-Core and 128 GB. MMFF optimized structures were used as starting geometries for the geometry optimizations with the B3LYP density functional and the 6-311++G(d,p) basis set carried out as vacuum calculations. Subsequent frequency calculations of all final structures evidenced the absence of imaginary frequencies and thus the presence of true minima on the potential energy surface.

#### Cation (4a)

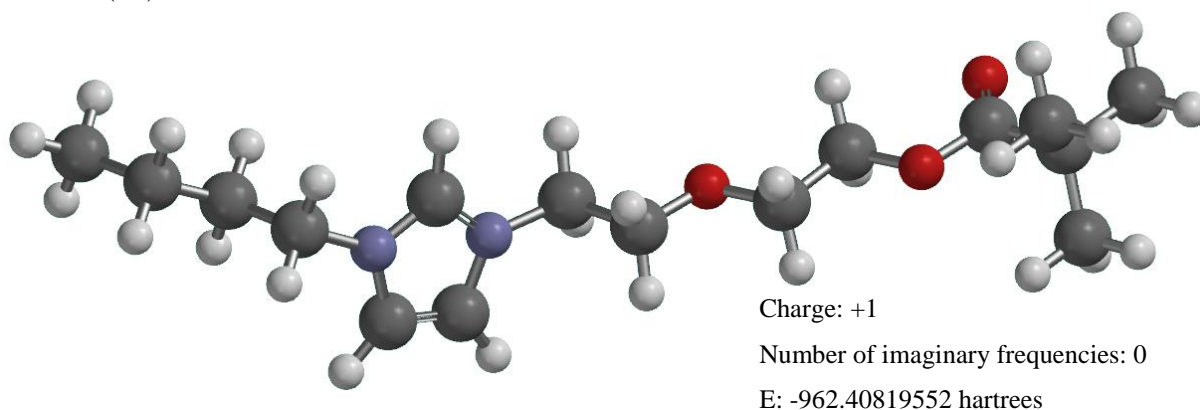

| Coordinates (Angstroem) |               |               |               |
|-------------------------|---------------|---------------|---------------|
| ATOM                    | X             | Y             | Z             |
| N                       | -0.0153932224 | -1.3879345805 | 4.2733928882  |
| C                       | -0.9345897382 | -2.3621137318 | 3.9352374242  |
| C                       | -1.5217289999 | -1.9760680222 | 2.7689409444  |
| N                       | -0.9623705416 | -0.7628790725 | 2.4144721962  |
| C                       | -0.0538935290 | -0.4329431106 | 3.3403125496  |
| C                       | 0.8164252433  | -1.3675879890 | 5.5006907347  |
| C                       | 0.0641949871  | -0.8185155169 | 6.7146005323  |
| C                       | 0.9402180807  | -0.8302654666 | 7.9741159738  |
| C                       | 0.2085952600  | -0.2860065010 | 9.2036839026  |
| C                       | -1.2713449896 | 0.0154622140  | 1.2003521087  |
| C                       | -0.5052206383 | -0.4939295410 | -0.0236163575 |
| O                       | -0.8679627092 | 0.3641678714  | -1.0701063896 |
| C                       | -0.2364626395 | 0.0663653076  | -2.3188332670 |
| C                       | -0.6963860307 | 1.1203930076  | -3.3095535126 |
| O                       | -0.0328167770 | 0.8164053277  | -4.5442231489 |
| C                       | -0.2769116005 | 1.6807294297  | -5.5740703243 |
| C                       | 0.4718977182  | 1.2813758617  | -6.8465424034 |
| O                       | -1.0053813973 | 2.6303376518  | -5.4412158534 |
| C                       | 0.1540451485  | 2.3032759078  | -7.9484937671 |
| C                       | 0.0112484671  | -0.1277622921 | -7.2816570063 |
| C                       | 1.9896628191  | 1.2688294817  | -6.5574914587 |
| H                       | -1.0898402418 | -3.2374885713 | 4.5430131025  |

|   |               |               |               |
|---|---------------|---------------|---------------|
| H | -2.2827998720 | -2.4507199465 | 2.1729434624  |
| H | 0.5460361055  | 0.4619040325  | 3.3340978434  |
| H | 1.1518394360  | -2.3923977926 | 5.6692664444  |
| H | 1.7002252691  | -0.7676506879 | 5.2752473127  |
| H | -0.8380778722 | -1.4162177647 | 6.8864448381  |
| H | -0.2697086383 | 0.2032423108  | 6.5015947256  |
| H | 1.2779524182  | -1.8541040932 | 8.1715946441  |
| H | 1.8444323689  | -0.2369991815 | 7.7938455175  |
| H | 0.8615170720  | -0.2971078400 | 10.0785587640 |
| H | -0.1196012738 | 0.7455630829  | 9.0479808388  |
| H | -0.6737208908 | -0.8872064991 | 9.4413835457  |
| H | -1.0166399611 | 1.0578698839  | 1.3916591312  |
| H | -2.3461957130 | -0.0408054556 | 1.0289026145  |
| H | 0.5789642090  | -0.4620008959 | 0.1663609723  |
| H | -0.7768176288 | -1.5378370375 | -0.2428783254 |
| H | 0.8546220195  | 0.0982215711  | -2.2075100495 |
| H | -0.5235570670 | -0.9362518609 | -2.6595494301 |
| H | -0.4234173714 | 2.1217599490  | -2.9702228056 |
| H | -1.7794335716 | 1.0899635401  | -3.4456505676 |
| H | 0.4629798648  | 3.3100091628  | -7.6611243593 |
| H | -0.9152997639 | 2.3348330594  | -8.1656312208 |
| H | 0.6840879775  | 2.0272315829  | -8.8635132149 |
| H | 0.5234401183  | -0.4049857570 | -8.2065136296 |
| H | -1.0648532315 | -0.1519964291 | -7.4745430075 |
| H | 0.2444358542  | -0.8771130808 | -6.5232117466 |
| H | 2.3387446876  | 2.2509589485  | -6.2264210929 |
| H | 2.2459527711  | 0.5338200790  | -5.7925403811 |
| H | 2.5289080144  | 1.0141694543  | -7.4735796921 |

LUMO+2 (-3.53 eV)

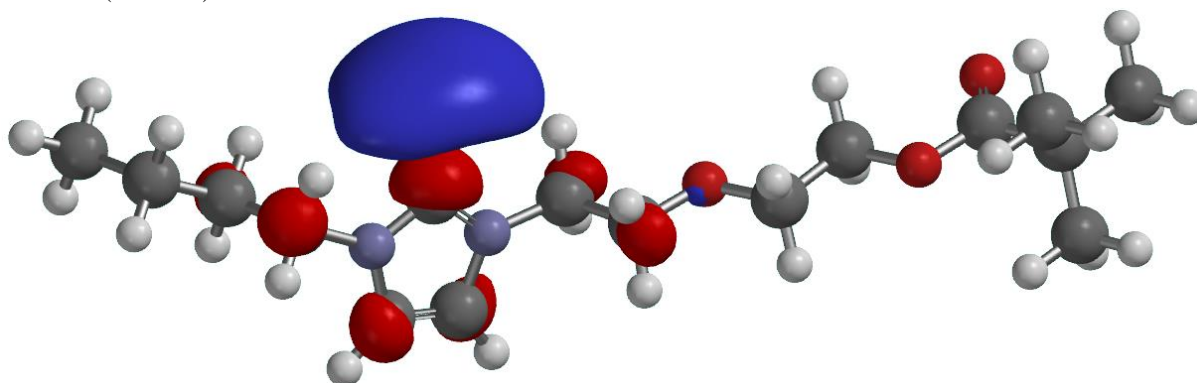

LUMO+1 (-4.14 eV)

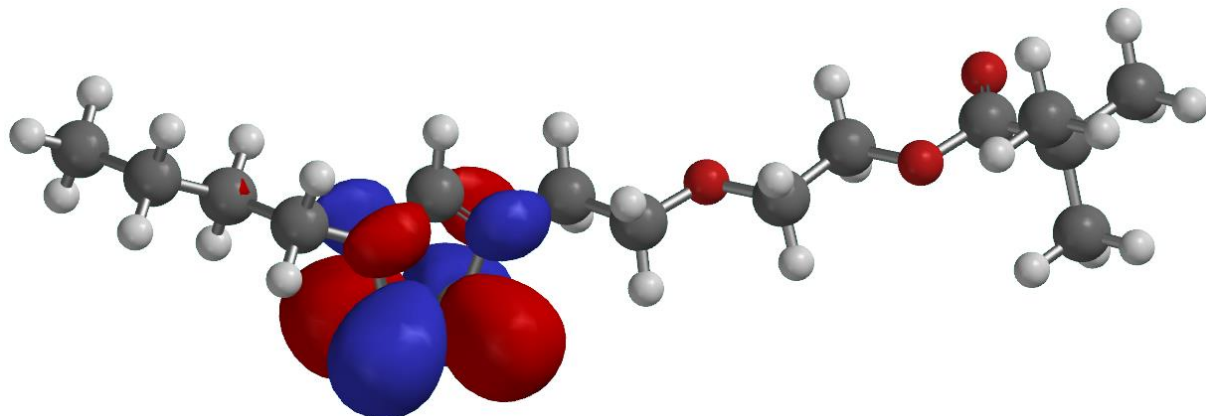

LUMO (-5.10 eV)

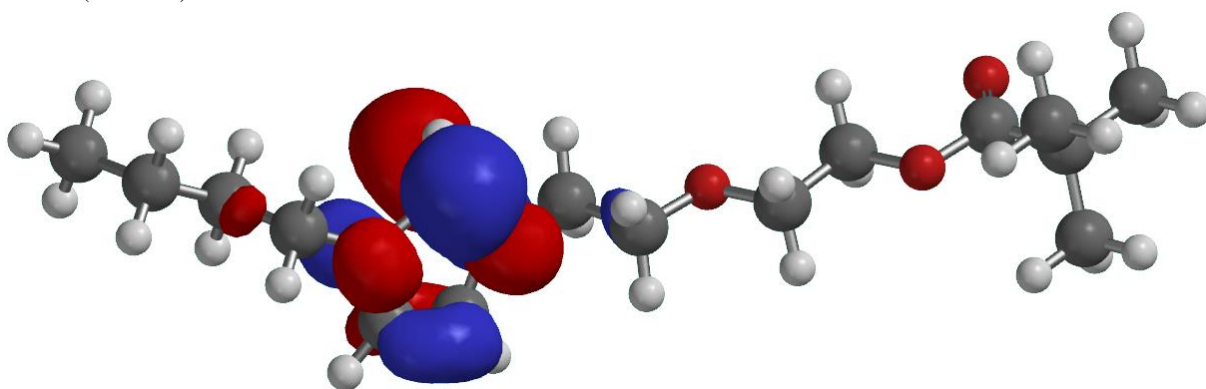

HOMO (-9.34 eV)

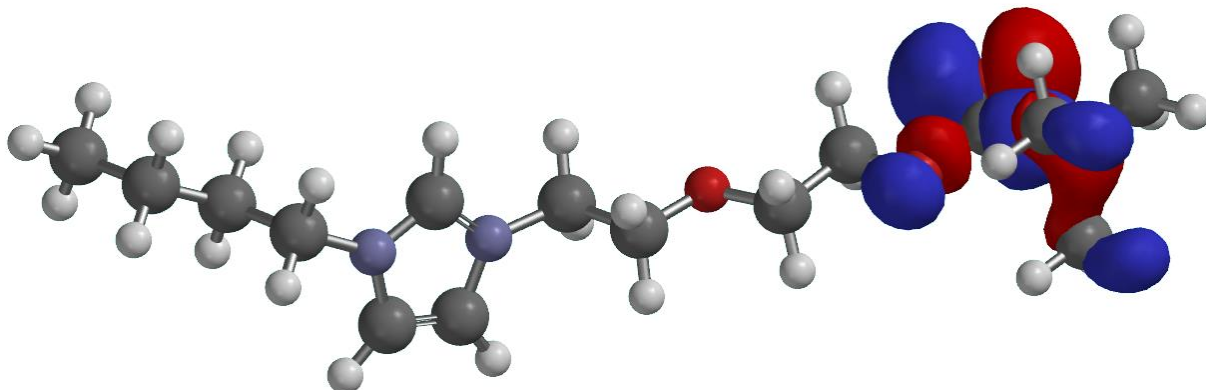

HOMO-1 (-10.37 eV)

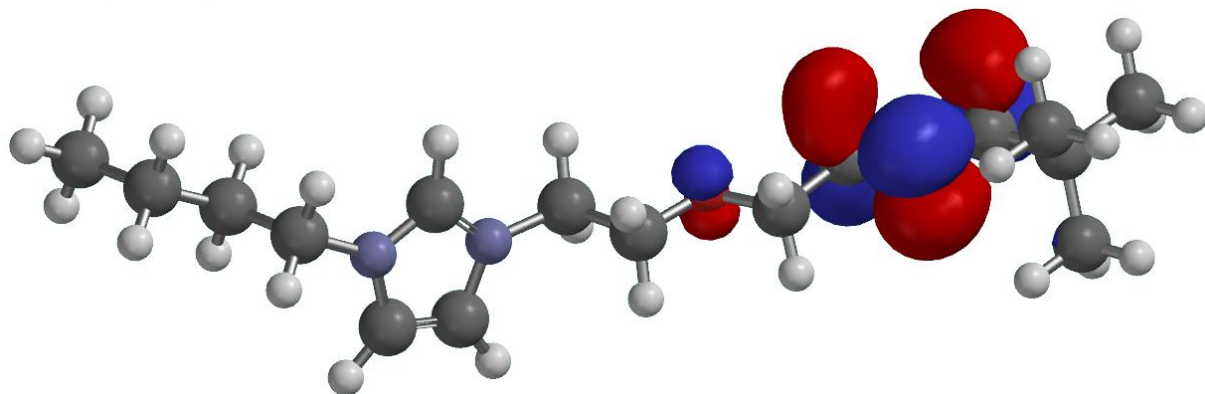

HOMO-2 (-10.59 eV)

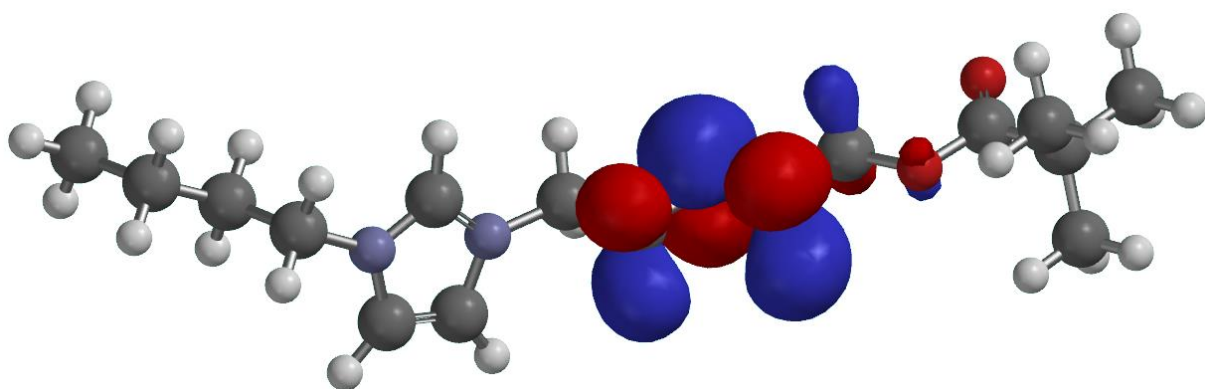

HOMO-3 (-10.80 eV)

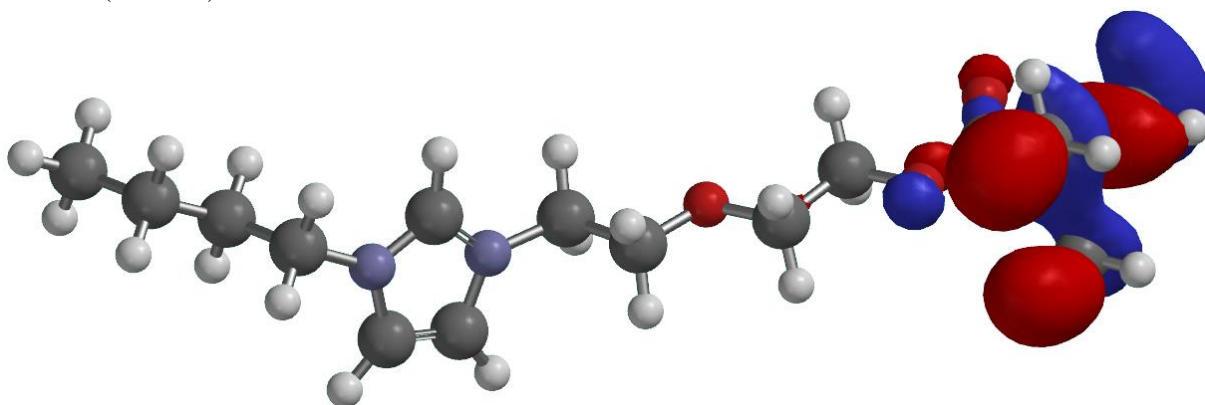

HOMO-4 (-10.80 eV)

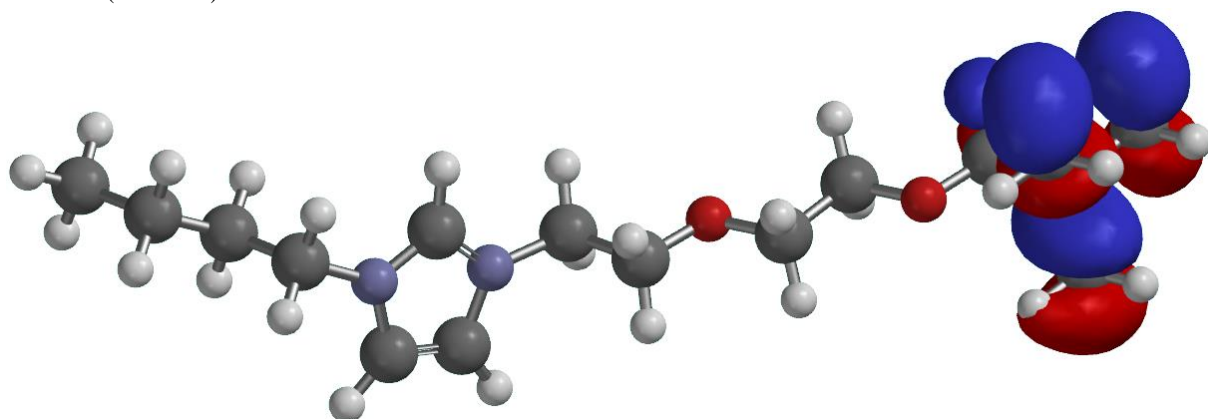

**Carbene (4aA) from the cation (4a)**

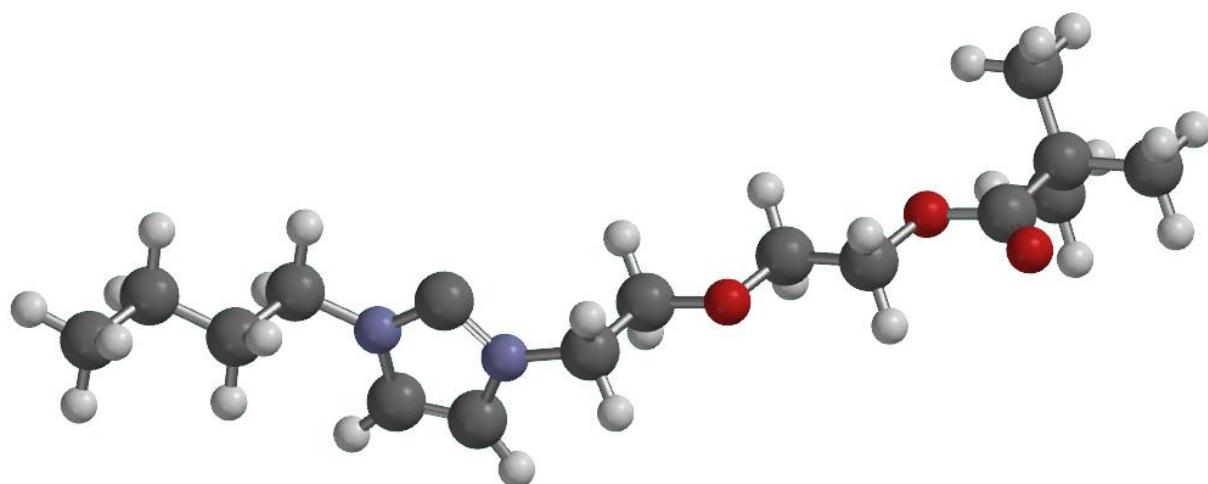

Charge: 0

Number of imaginary frequencies: 0

E: -961.97805795 hartrees

Coordinates (Angstroem)

| ATOM | X             | Y             | Z             |
|------|---------------|---------------|---------------|
| N    | 0.1116588028  | -1.2342216711 | 4.3015165307  |
| C    | 1.1655167436  | -2.0892737331 | 3.9930440886  |
| C    | 1.7289710063  | -1.6026124571 | 2.8618559234  |
| N    | 1.0029089359  | -0.4619124672 | 2.5294585280  |
| C    | -0.0142692338 | -0.2092705506 | 3.4087637384  |
| C    | -0.7280529093 | -1.3585385876 | 5.4909247603  |
| C    | -0.0527082014 | -0.8260712942 | 6.7580803512  |
| C    | -0.9466372007 | -0.9432523904 | 7.9965178808  |
| C    | -0.2808665185 | -0.4103613134 | 9.2684877524  |
| C    | 1.2428270055  | 0.3502773799  | 1.3442529689  |
| C    | 0.5016465740  | -0.1956212415 | 0.1264915220  |
| O    | 0.8412506895  | 0.6208029430  | -0.9818160683 |
| C    | 0.1766234104  | 0.2561266193  | -2.1772997104 |
| C    | 0.6372607691  | 1.2198316833  | -3.2561267388 |
| O    | -0.0467349896 | 0.8338593332  | -4.4654914972 |

|   |               |               |               |
|---|---------------|---------------|---------------|
| C | 0.2595521775  | 1.5360793528  | -5.5831674914 |
| C | -0.5333018943 | 1.0428990307  | -6.7994671706 |
| O | 1.0596064650  | 2.4392178571  | -5.5830787020 |
| C | -0.0742581422 | 1.8212864678  | -8.0413745988 |
| C | -0.2825099764 | -0.4674252227 | -6.9986460267 |
| C | -2.0364033510 | 1.2924325080  | -6.5443712050 |
| H | 1.4248488833  | -2.9507485532 | 4.5863559656  |
| H | 2.5669422452  | -1.9591604808 | 2.2857389662  |
| H | -1.6396396804 | -0.7972184460 | 5.2814178111  |
| H | -1.0017007017 | -2.4117670301 | 5.6141098996  |
| H | 0.2183361516  | 0.2218163117  | 6.5899132350  |
| H | 0.8852505287  | -1.3686433263 | 6.9282910497  |
| H | -1.8818693181 | -0.3983864998 | 7.8196465506  |
| H | -1.2291271098 | -1.9926732473 | 8.1463504027  |
| H | -0.9471002165 | -0.4957907099 | 10.1312192952 |
| H | 0.6340240472  | -0.9652514059 | 9.4990120032  |
| H | -0.0100456643 | 0.6443195853  | 9.1606167230  |
| H | 2.3155830407  | 0.3830133470  | 1.1384412918  |
| H | 0.9022648808  | 1.3622112190  | 1.5599712063  |
| H | 0.7917826731  | -1.2399251231 | -0.0637928867 |
| H | -0.5805242189 | -0.1715816819 | 0.3123158259  |
| H | 0.4258218321  | -0.7760373098 | -2.4628847181 |
| H | -0.9132119969 | 0.3197714779  | -2.0518562356 |
| H | 1.7166557366  | 1.1598672964  | -3.4053823578 |
| H | 0.3828206093  | 2.2498273558  | -2.9988115015 |
| H | 0.9884377680  | 1.6638800403  | -8.2377567014 |
| H | -0.2319584887 | 2.8945049847  | -7.9186802220 |
| H | -0.6406241486 | 1.4852619330  | -8.9143826406 |
| H | 0.7795555179  | -0.6740228501 | -7.1584368673 |
| H | -0.8277707807 | -0.8138467979 | -7.8811379458 |
| H | -0.6207038575 | -1.0439723711 | -6.1365006324 |
| H | -2.3859550460 | 0.7472487797  | -5.6659998039 |
| H | -2.2408021527 | 2.3564351313  | -6.3956997288 |
| H | -2.6133706957 | 0.9566161250  | -7.4106328191 |

LUMO+2 (-0.10 eV)

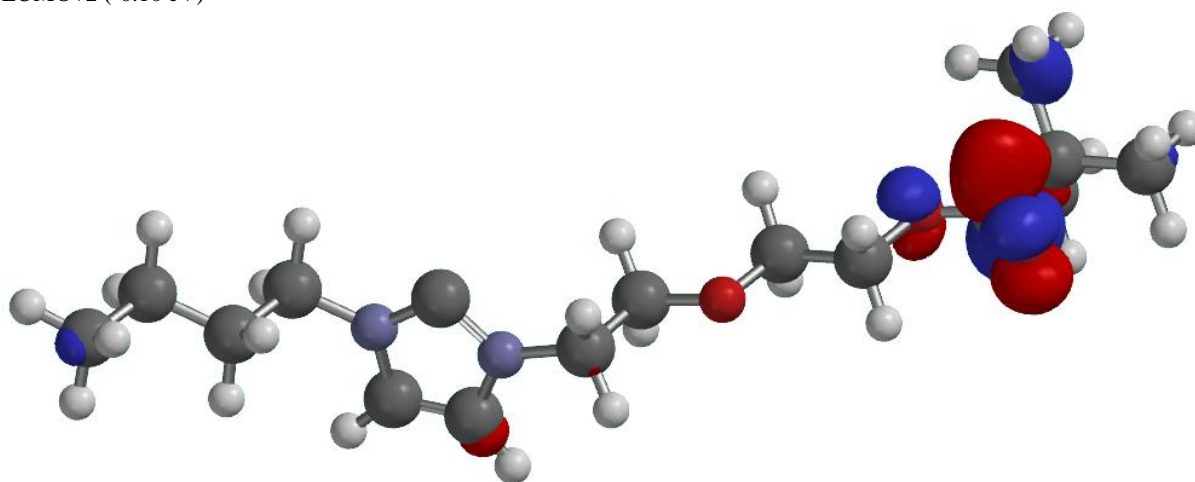

LUMO+1 (-0.28 eV)

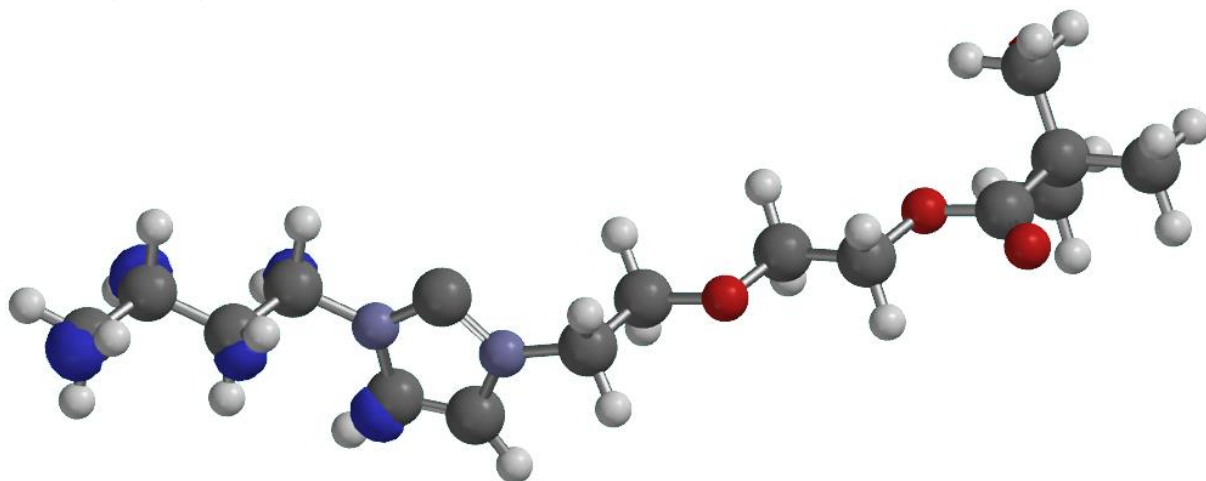

LUMO (-0.35 eV)

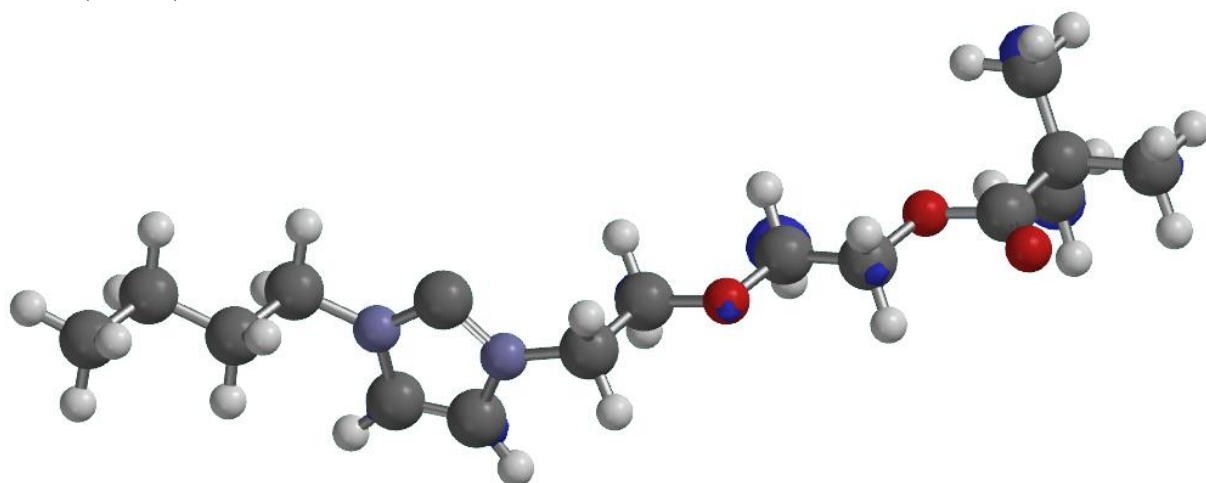

HOMO (-5.98 eV)

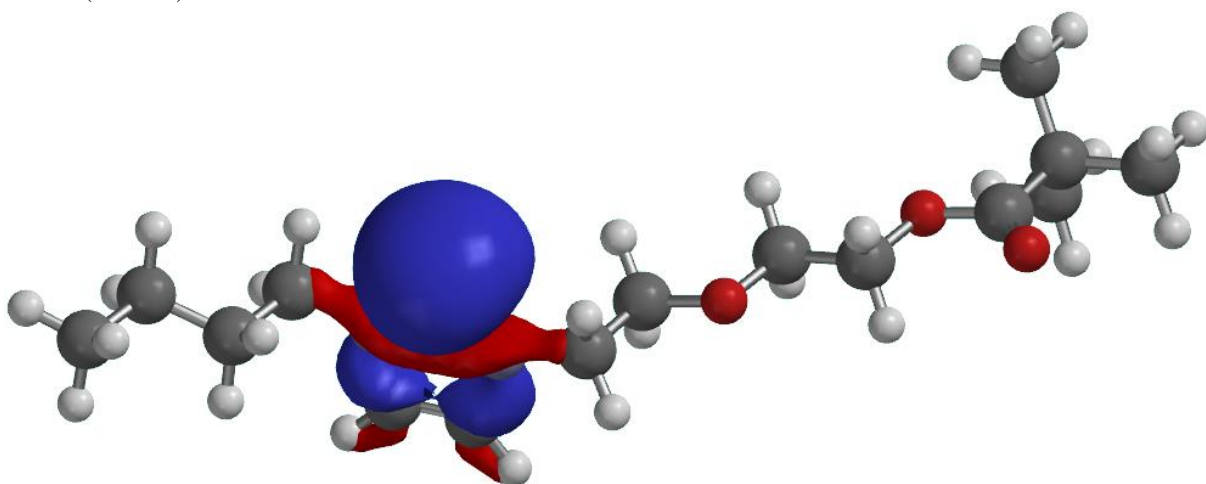



HOMO-1 (-6.42 eV)

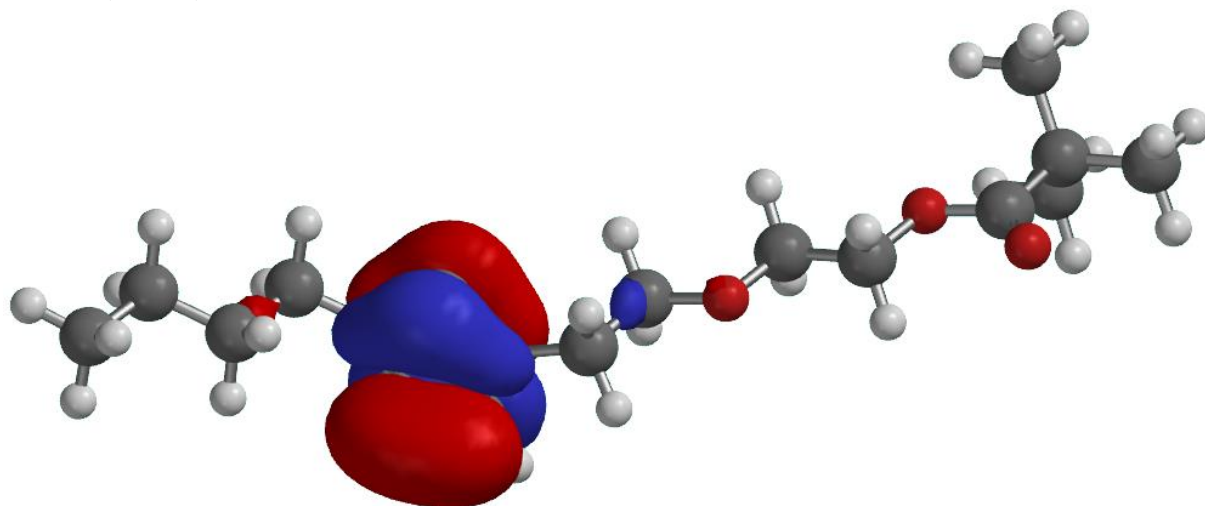

HOMO-2 (-7.55 eV)

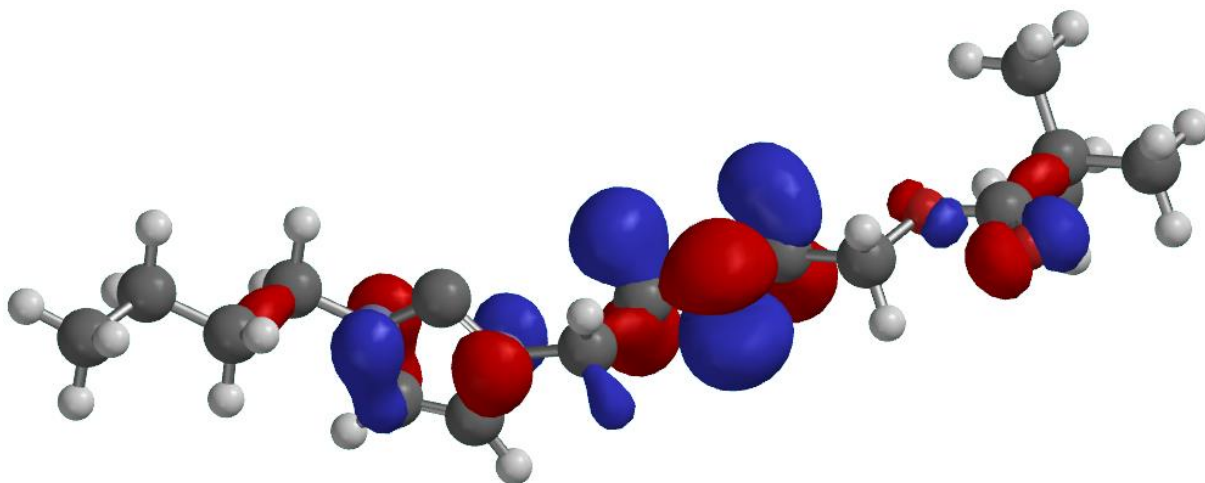

HOMO-3 (-7.58 eV)

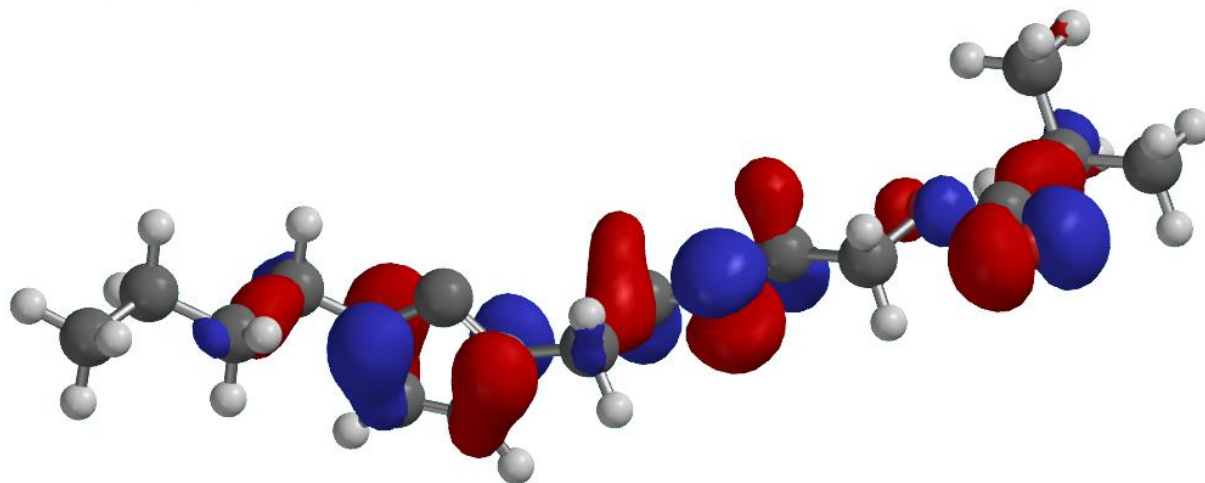

HOMO-4 (-7.62 eV)

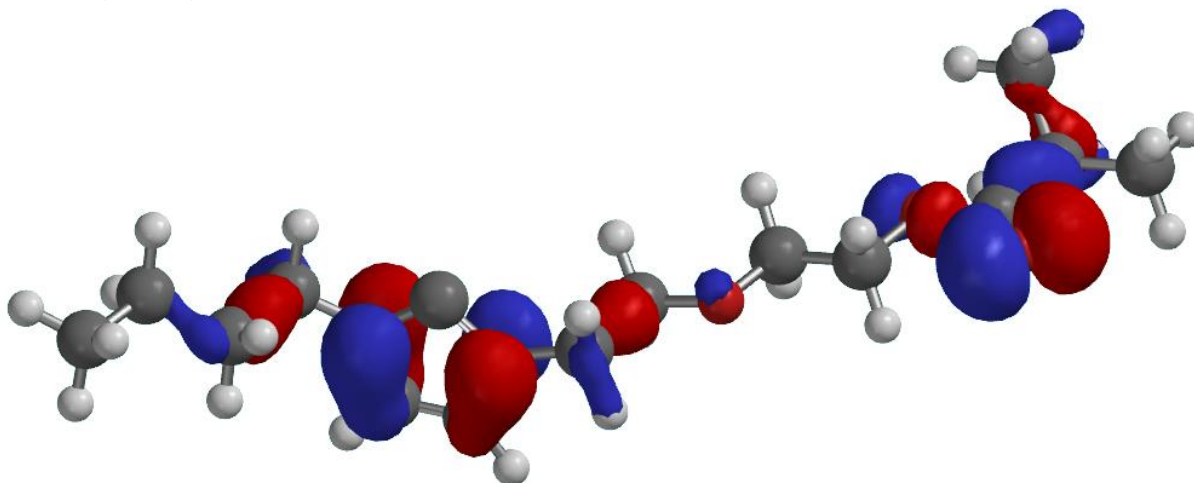

**Calculated CREF value for compound 1-butyl-3-(2-(2-(pivaloyloxy)ethoxy)ethyl)-1H-imidazol-3-ium and its carbene**

Cation:  
Electronic energy: -962.40819552 hartrees  
Zero point energy: 0.44173038 hartrees  
Sum of electronic energy and ZPE: -961.96646514 hartrees

Corresponding carbene:  
Electronic energy: -961.97805795 hartrees  
Zero point energy: 0.42800788 hartrees  
Sum of electronic energy and ZPE: -961.55005007 hartrees

Resulting CREF value: **0.416**

**Selenone (6a)**

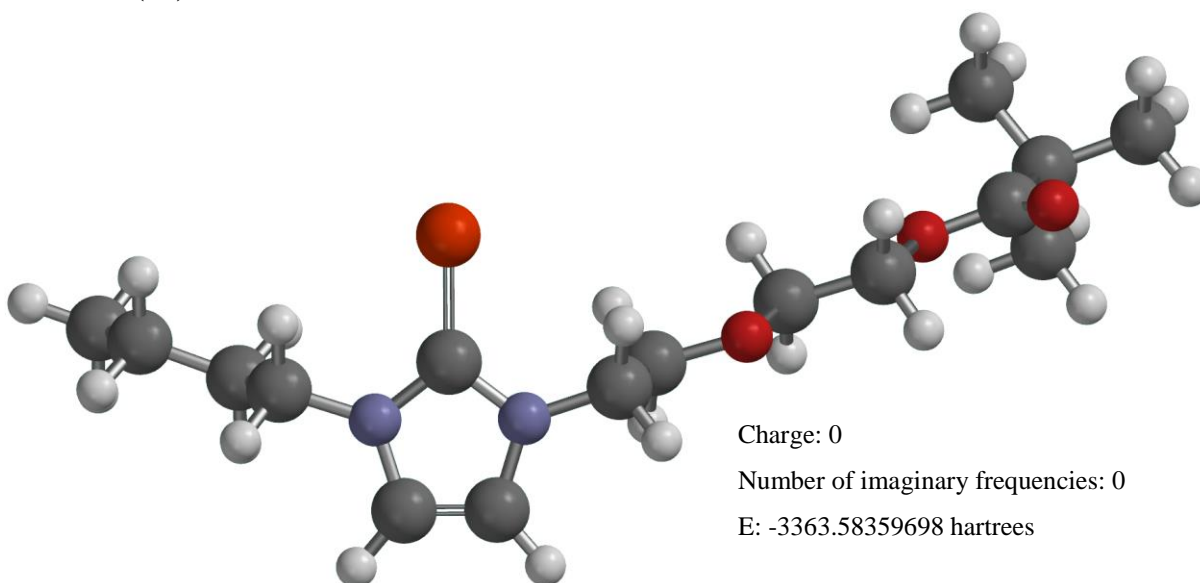

## Coordinates (Angstroem)

| Atom | X             | Y             | Z             |
|------|---------------|---------------|---------------|
| N    | 1.1113704467  | 0.0646596407  | 4.7135449023  |
| C    | 2.4466729106  | -0.2378079410 | 4.4927969156  |
| C    | 2.7718342186  | 0.2395587253  | 3.2691935099  |
| N    | 1.6318195411  | 0.8314025241  | 2.7427656808  |
| C    | 0.5905661216  | 0.7243643803  | 3.6310827277  |
| C    | 0.3525138513  | -0.2954131657 | 5.9119707398  |
| C    | -0.2700391612 | -1.6911633114 | 5.8238045947  |
| C    | -1.1155666990 | -2.0249019784 | 7.0578655239  |
| C    | -1.7581242167 | -3.4125736970 | 6.9785580389  |
| Se   | -1.1336380244 | 1.3448850507  | 3.4121503698  |
| C    | 1.5507391637  | 1.4868256448  | 1.4421719636  |
| C    | 1.0436227701  | 0.5418377845  | 0.3548832013  |
| O    | 1.0524204460  | 1.2751389963  | -0.8570417930 |
| C    | 0.4489820997  | 0.5908099741  | -1.9414616822 |
| C    | 0.4793735856  | 1.5357869134  | -3.1291443785 |
| O    | -0.1292614063 | 0.8313600210  | -4.2304894112 |
| C    | -0.2318678944 | 1.5128529907  | -5.3972594634 |
| C    | -0.8987585376 | 0.6706168447  | -6.4913091596 |
| O    | 0.1670150644  | 2.6443133861  | -5.5247331032 |
| C    | -0.9914417864 | 1.5076014961  | -7.7756428791 |
| C    | -0.0438885246 | -0.5905909574 | -6.7445250396 |
| C    | -2.3119883539 | 0.2598558680  | -6.0240202727 |
| H    | 3.0443319282  | -0.7532634472 | 5.2245836208  |
| H    | 3.7061496289  | 0.2228137703  | 2.7351456056  |
| H    | 1.0332708053  | -0.2192466674 | 6.7647370077  |
| H    | -0.4268323969 | 0.4605509055  | 6.0239432491  |
| H    | 0.5204391118  | -2.4414557942 | 5.7022765065  |
| H    | -0.8947942757 | -1.7324111595 | 4.9261256860  |
| H    | -0.4918984681 | -1.9622318430 | 7.9584656996  |
| H    | -1.8967967561 | -1.2649845823 | 7.1703285486  |
| H    | -2.3453814916 | -3.6302013947 | 7.8746150607  |
| H    | -2.4268903920 | -3.4877907397 | 6.1159907190  |
| H    | -0.9992144682 | -4.1951934497 | 6.8802123980  |
| H    | 2.5453153248  | 1.8552704698  | 1.1839257195  |
| H    | 0.8714650965  | 2.3352954175  | 1.5318356350  |
| H    | 1.6952317455  | -0.3417837538 | 0.2764991906  |
| H    | 0.0290972966  | 0.2072490617  | 0.6038762609  |
| H    | 0.9991582555  | -0.3320269634 | -2.1748997399 |
| H    | -0.5868032330 | 0.3185549521  | -1.6979748998 |
| H    | 1.5036637743  | 1.8123774558  | -3.3863671734 |
| H    | -0.0798739761 | 2.4490613338  | -2.9185150753 |
| H    | -0.0032362106 | 1.8161618064  | -8.1222605930 |
| H    | -1.5831235821 | 2.4120468999  | -7.6201880467 |
| H    | -1.4656487551 | 0.9162210056  | -8.5638893819 |
| H    | 0.9696601363  | -0.3236695818 | -7.0572983266 |
| H    | -0.4967551869 | -1.1824921460 | -7.5448858298 |
| H    | 0.0239173724  | -1.2133184048 | -5.8510785416 |
| H    | -2.2721779991 | -0.3465687592 | -5.1177892372 |
| H    | -2.9345867616 | 1.1364915775  | -5.8235630185 |
| H    | -2.8000421376 | -0.3248751590 | -6.8090120305 |

LUMO+2 (-0.24 eV)

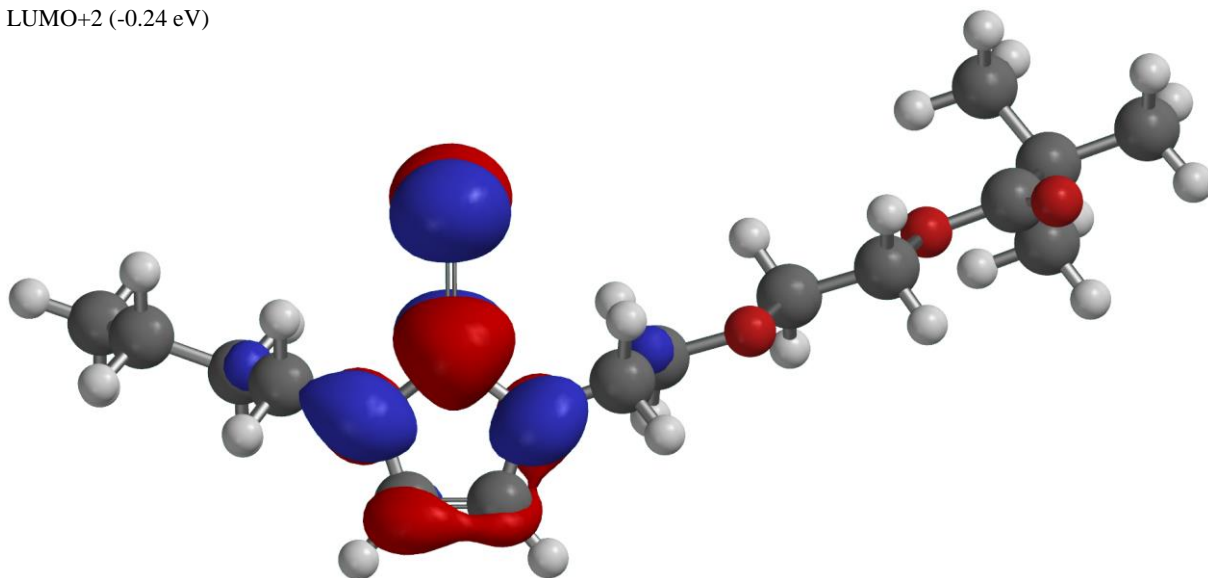

LUMO+1 (-0.30 eV)

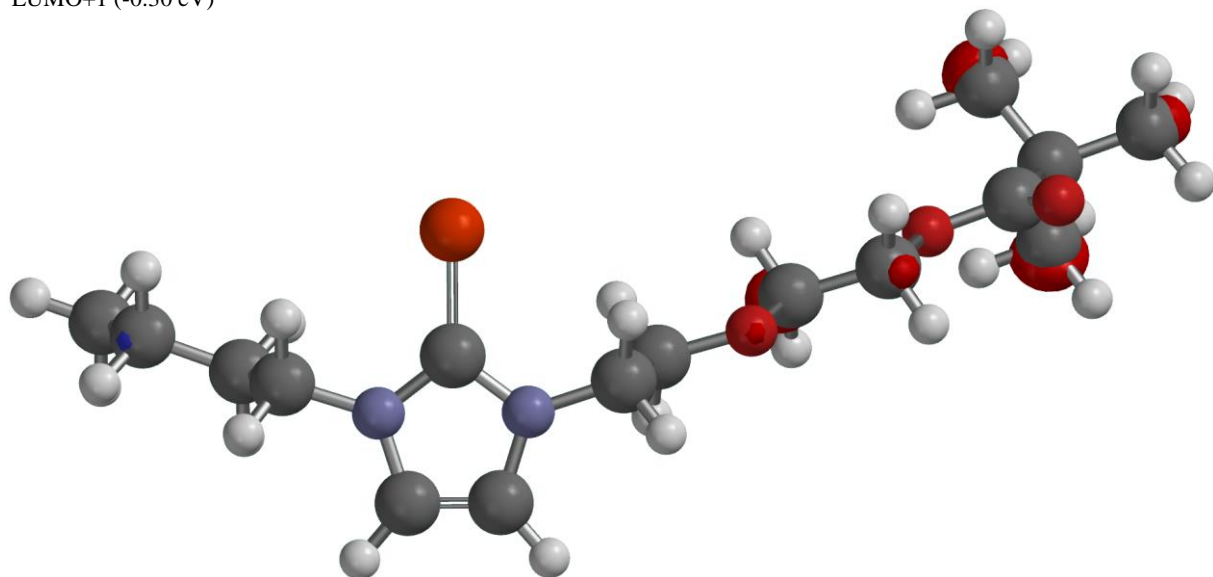

LUMO (-0.50 eV)

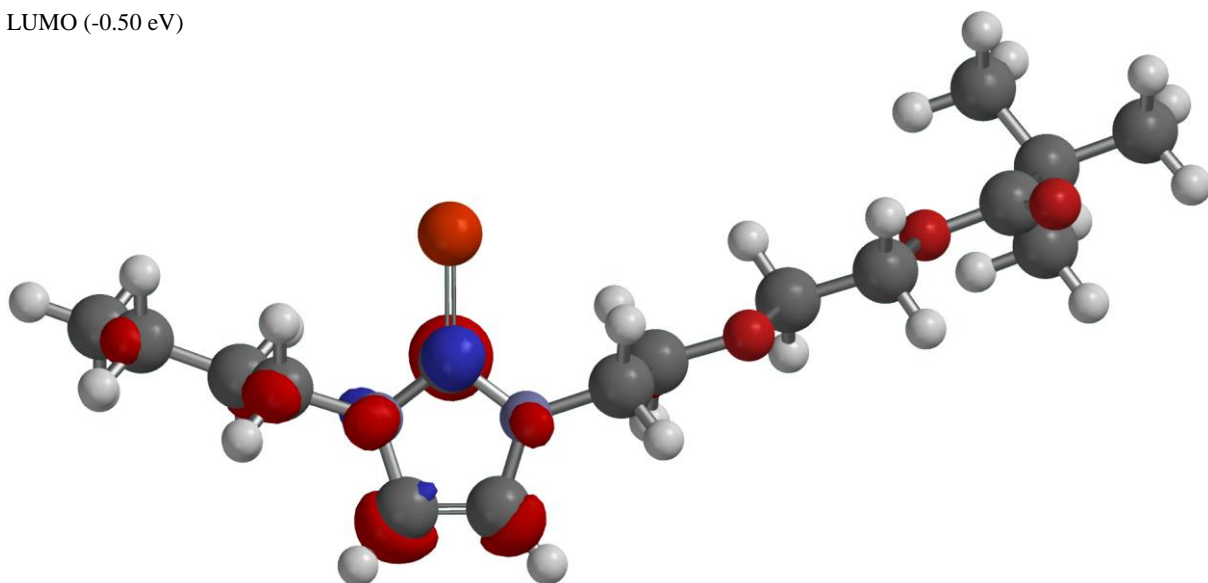

HOMO (-5.18 eV)

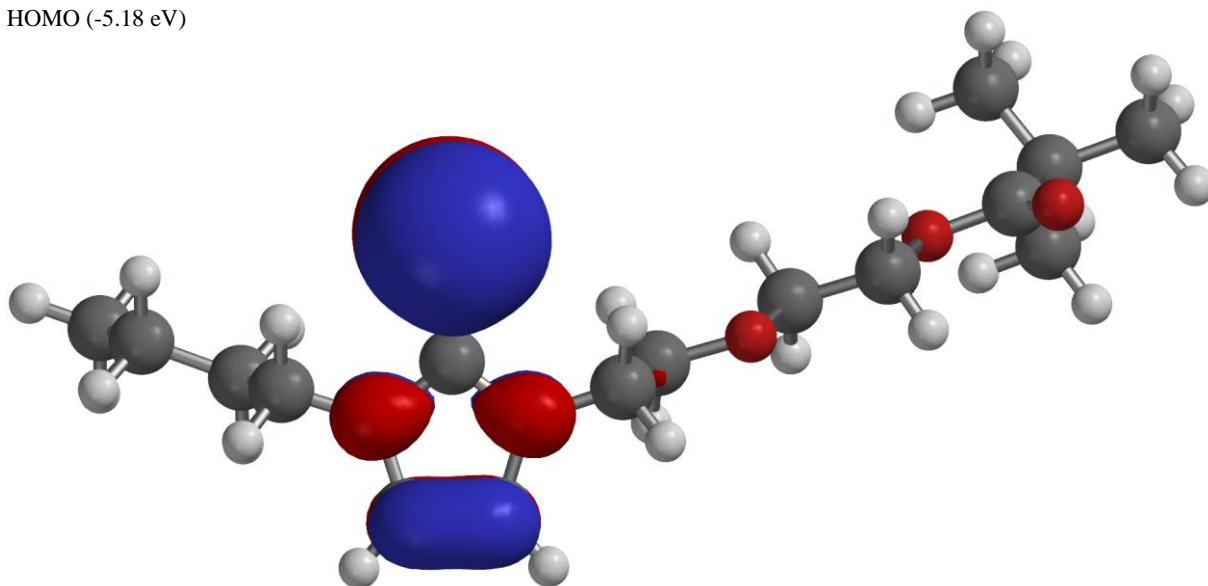

HOMO-1 (-5.38 eV)

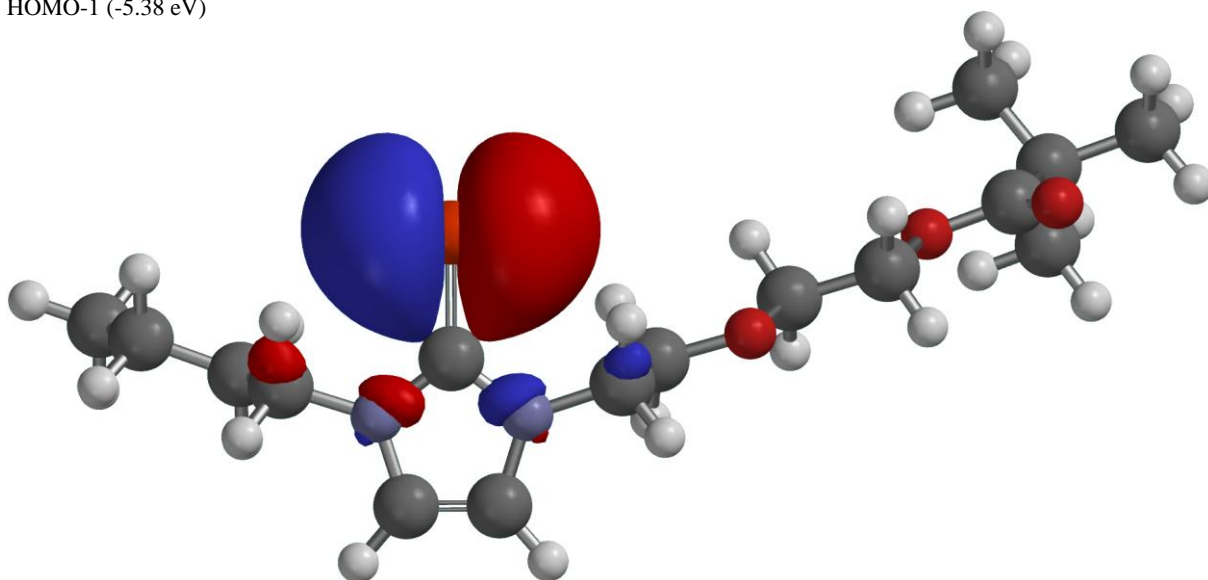

HOMO-2 (-7.56 eV)

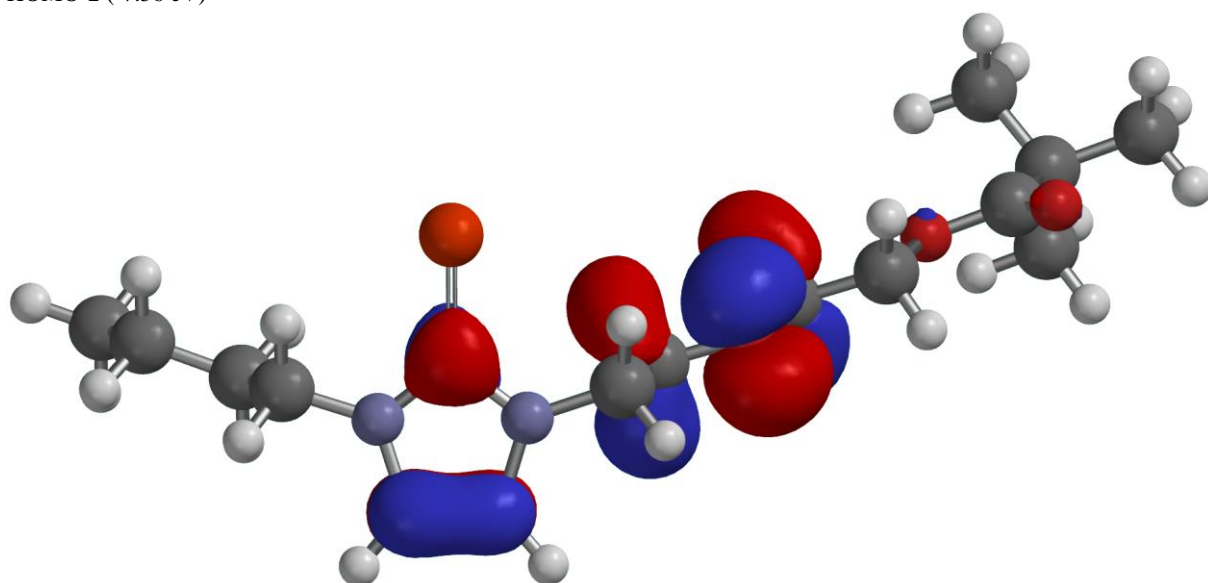

HOMO-3 (-7.58 eV)

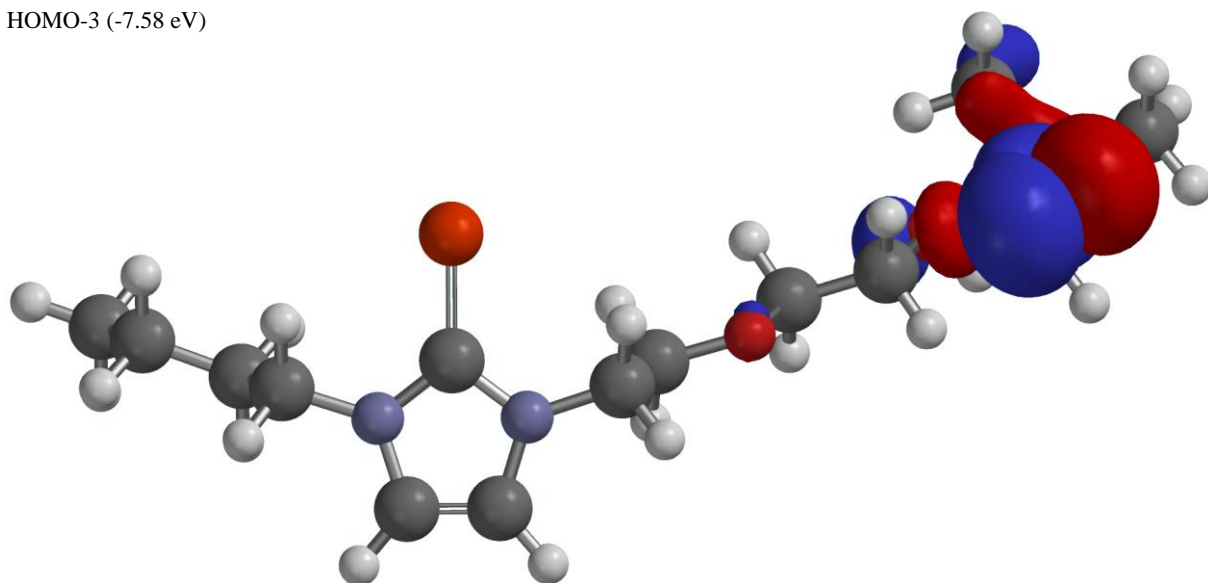

HOMO-4 (-7.82 eV)

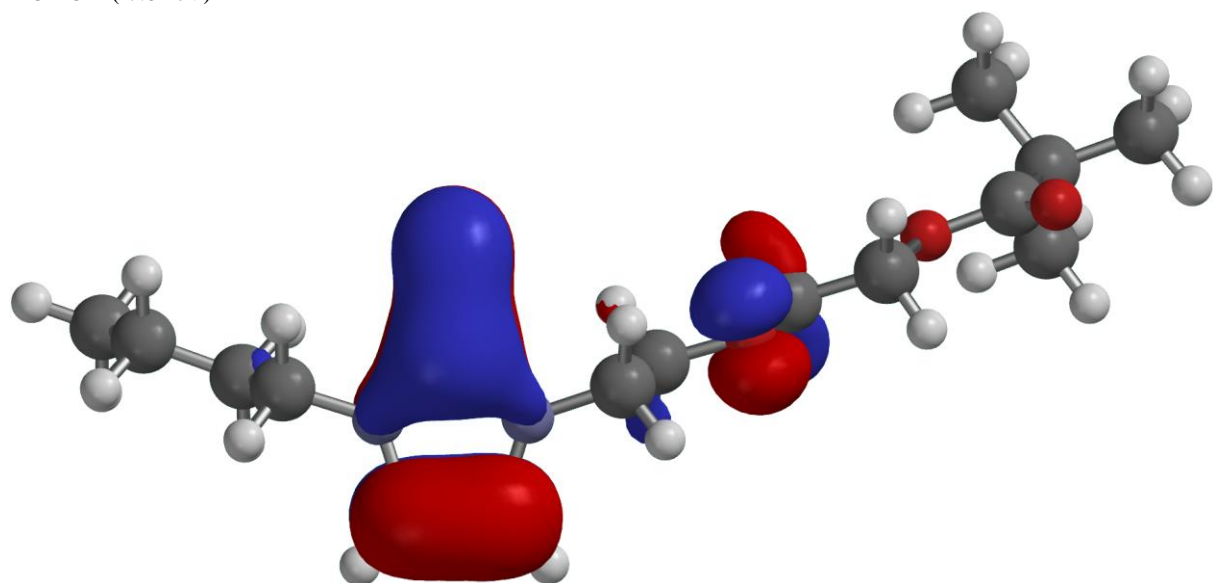

## Thione (5a)

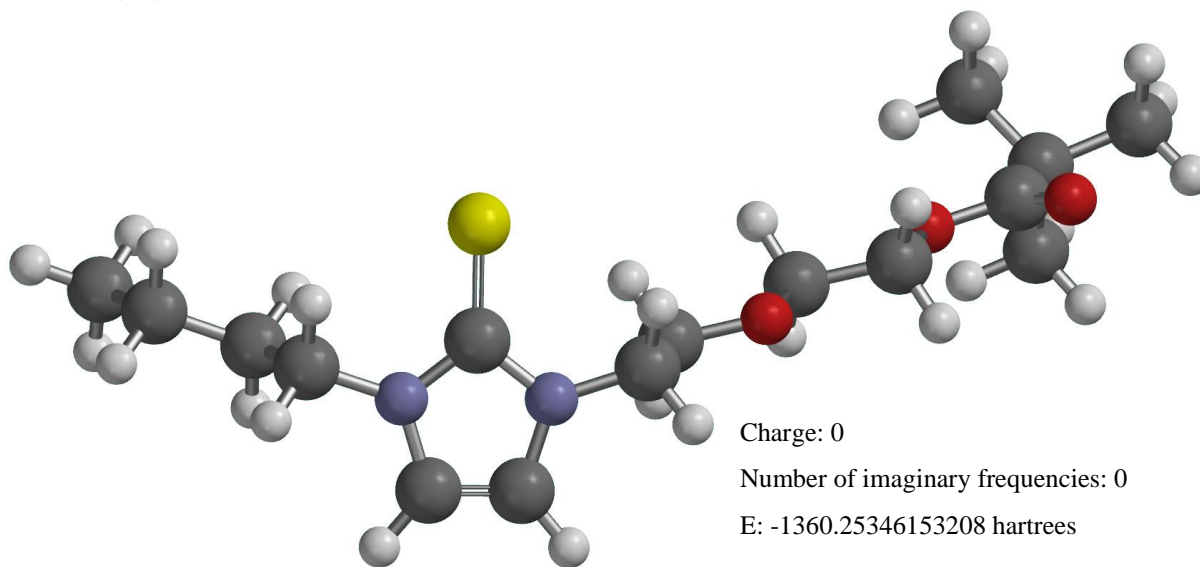

### Coordinates (Angstrom)

| Atom | X             | Y             | Z             |
|------|---------------|---------------|---------------|
| N    | -2.0378249091 | -0.0096922801 | 4.3872276440  |
| C    | -2.6976280829 | 1.1820454891  | 4.1249104308  |
| C    | -2.9185947972 | 1.2387283347  | 2.7917365688  |
| N    | -2.3915368303 | 0.0801435455  | 2.2361974137  |
| C    | -1.8325342202 | -0.7076345776 | 3.2196759151  |
| C    | -1.6051809049 | -0.4648279989 | 5.7066512539  |
| C    | -0.1951476237 | 0.0081076977  | 6.0720400851  |
| C    | 0.2435543203  | -0.4967194861 | 7.4505907443  |
| C    | 1.6505460356  | -0.0309604472 | 7.8355891334  |
| C    | -2.4291085313 | -0.2699199867 | 0.8228517328  |
| C    | -1.1627554633 | 0.1720703467  | 0.0930625277  |
| O    | -1.3475450762 | -0.1273429337 | -1.2796306585 |
| C    | -0.1993994290 | 0.1251315772  | -2.0700985522 |
| C    | -0.5370889733 | -0.2780090487 | -3.4942933137 |
| O    | 0.6381926229  | 0.0007366438  | -4.2816403056 |
| C    | 0.5883980139  | -0.3509895357 | -5.5894918485 |
| C    | 1.8813711722  | 0.0195882486  | -6.3250622807 |
| O    | -0.3806771775 | -0.8709988586 | -6.0852952802 |
| C    | 1.8115333188  | -0.5258470726 | -7.7590070408 |
| C    | 2.0023681150  | 1.5598782128  | -6.3520311175 |
| C    | 3.0916750353  | -0.5870064150 | -5.5834018692 |
| H    | -2.9564486051 | 1.8752184575  | 4.9065579277  |
| H    | -3.4085250271 | 1.9872842073  | 2.1934281666  |
| H    | -2.3389725385 | -0.1035435486 | 6.4329830551  |
| H    | -1.6472039046 | -1.5554975888 | 5.6923025998  |
| H    | -0.1608194321 | 1.1041251316  | 6.0496302400  |
| H    | 0.4993144956  | -0.3505015967 | 5.3058426818  |
| H    | -0.4725902378 | -0.1583161834 | 8.2099926523  |
| H    | 0.2063667619  | -1.5920107462 | 7.4607636772  |
| H    | 1.9385622557  | -0.4088890010 | 8.8202350497  |
| H    | 2.3936674138  | -0.3829558146 | 7.1138130384  |
| H    | 1.7113462348  | 1.0613980875  | 7.8682348138  |
| H    | -3.3033535044 | 0.2057989084  | 0.3741255457  |
| H    | -2.5384558833 | -1.3521079290 | 0.7461498646  |
| H    | -0.9970256186 | 1.2513630600  | 0.2314934186  |
| H    | -0.2976148854 | -0.3675527434 | 0.4979267900  |
| H    | 0.0723937525  | 1.1898640430  | -2.0324706703 |

|   |               |               |               |
|---|---------------|---------------|---------------|
| H | 0.6573045623  | -0.4580713719 | -1.7060154308 |
| H | -1.3847978812 | 0.2953493205  | -3.8757341188 |
| H | -0.7822409327 | -1.3391121651 | -3.5587418114 |
| H | 0.9525492286  | -0.1187958222 | -8.2955114513 |
| H | 1.7201981743  | -1.6140763056 | -7.7673699947 |
| H | 2.7207060820  | -0.2519028504 | -8.3016615691 |
| H | 1.1487128805  | 2.0148900488  | -6.8625211774 |
| H | 2.9084432297  | 1.8451443193  | -6.8939664297 |
| H | 2.0610750102  | 1.9707564264  | -5.3426456890 |
| H | 3.1791497321  | -0.1898457845 | -4.5710420112 |
| H | 3.0110267457  | -1.6760125987 | -5.5206499096 |
| H | 4.0103456188  | -0.3504159396 | -6.1277126818 |
| S | -1.0757303427 | -2.1980654758 | 3.0319822410  |

LUMO+2 (-0.18 eV)

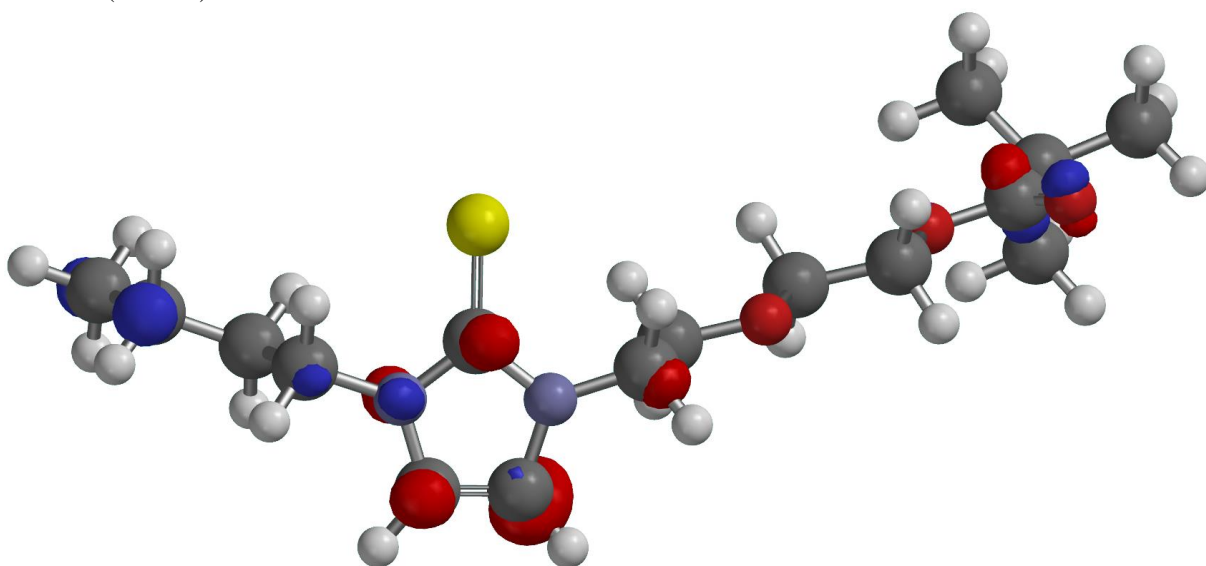

LUMO+1 (-0.31 eV)

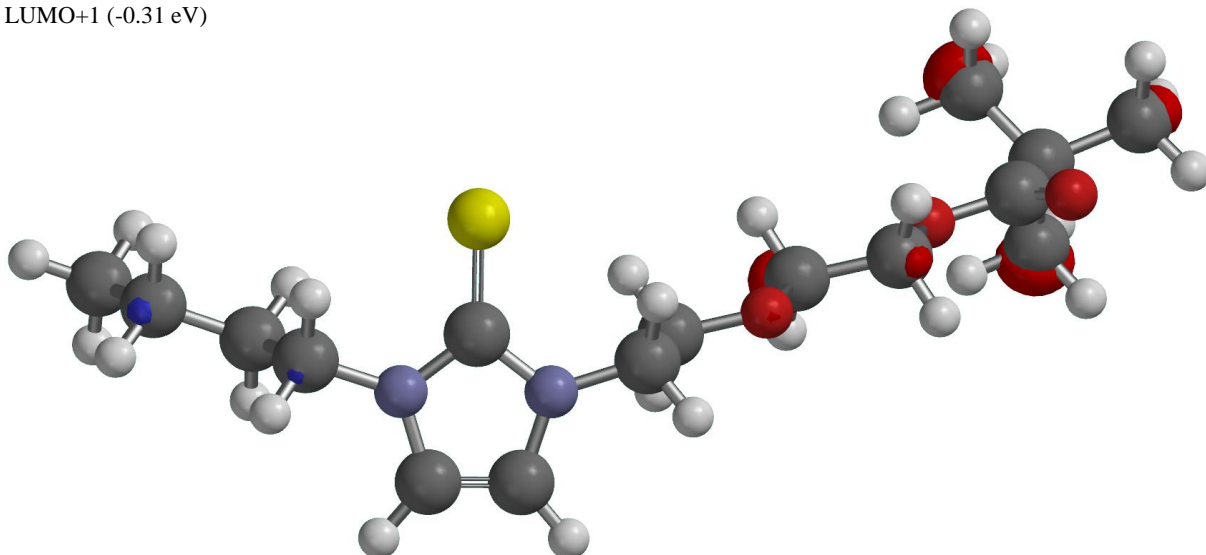



LUMO (-0.46 eV)

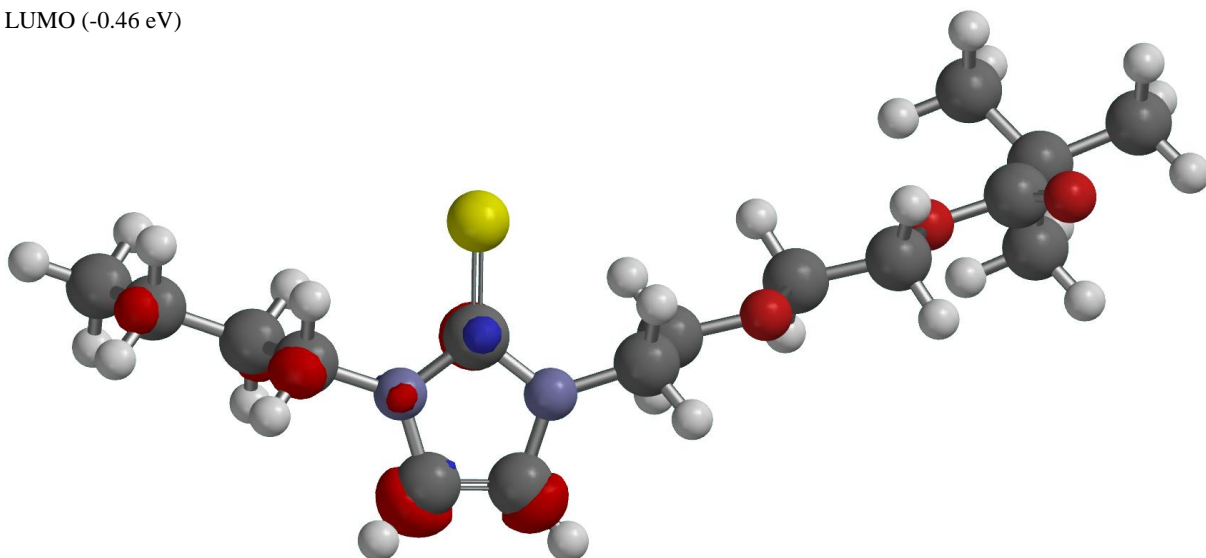

HOMO (-5.37 eV)

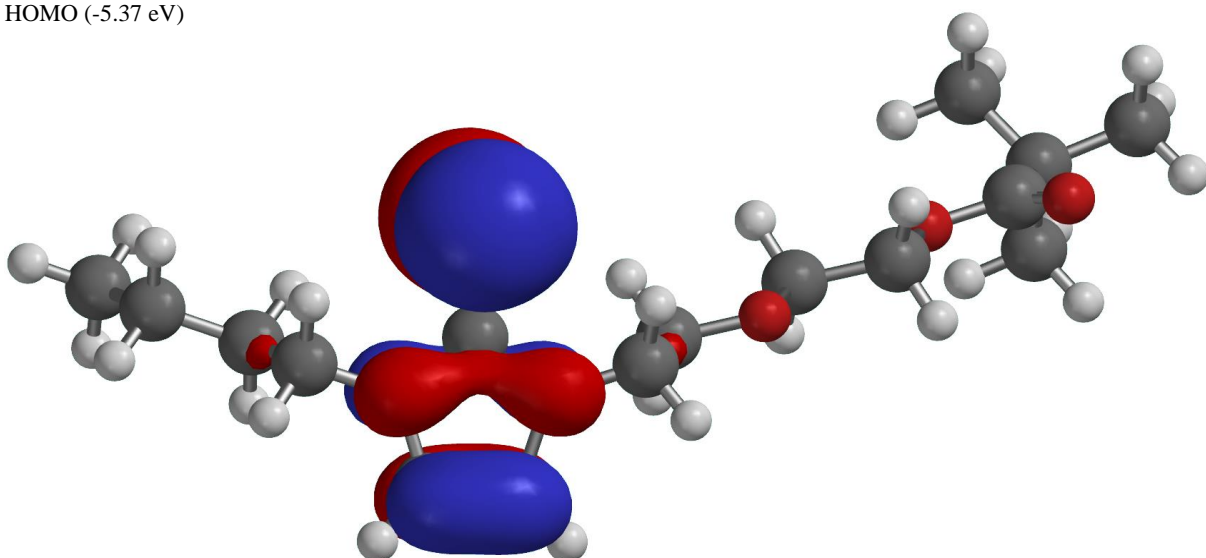

HOMO-1 (-5.77 eV)

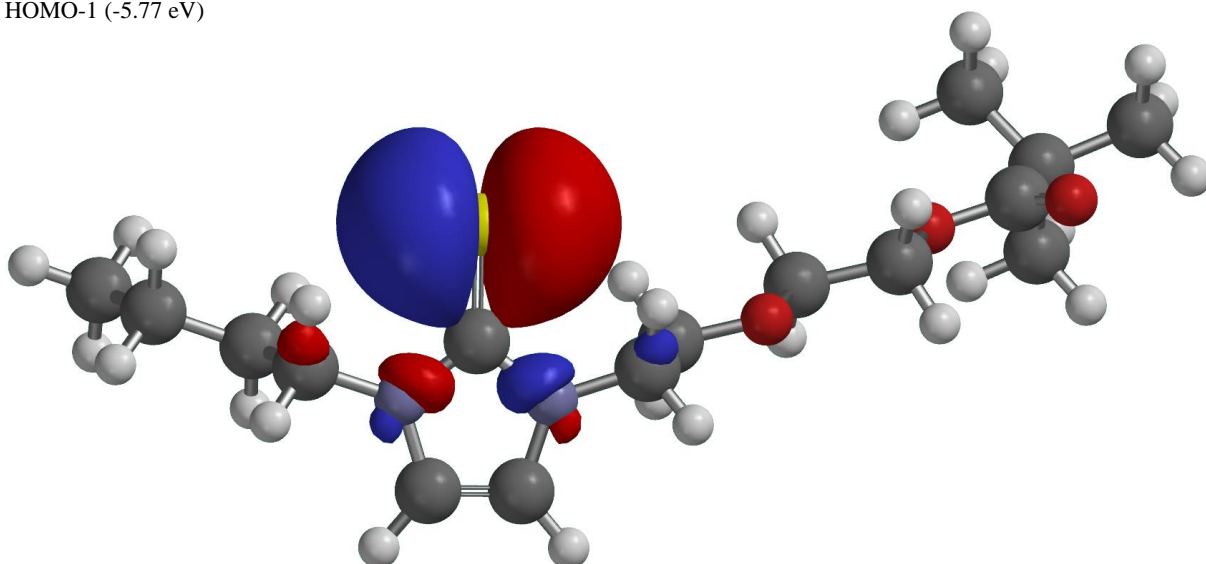

HOMO-2 (-7.58 eV)

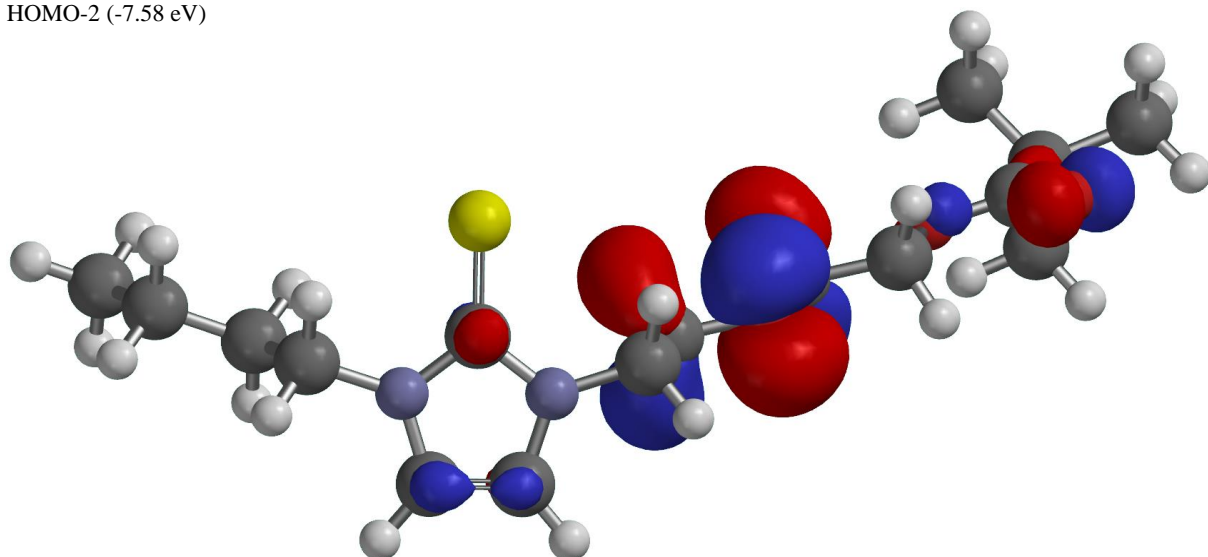

HOMO-3 (-7.60 eV)

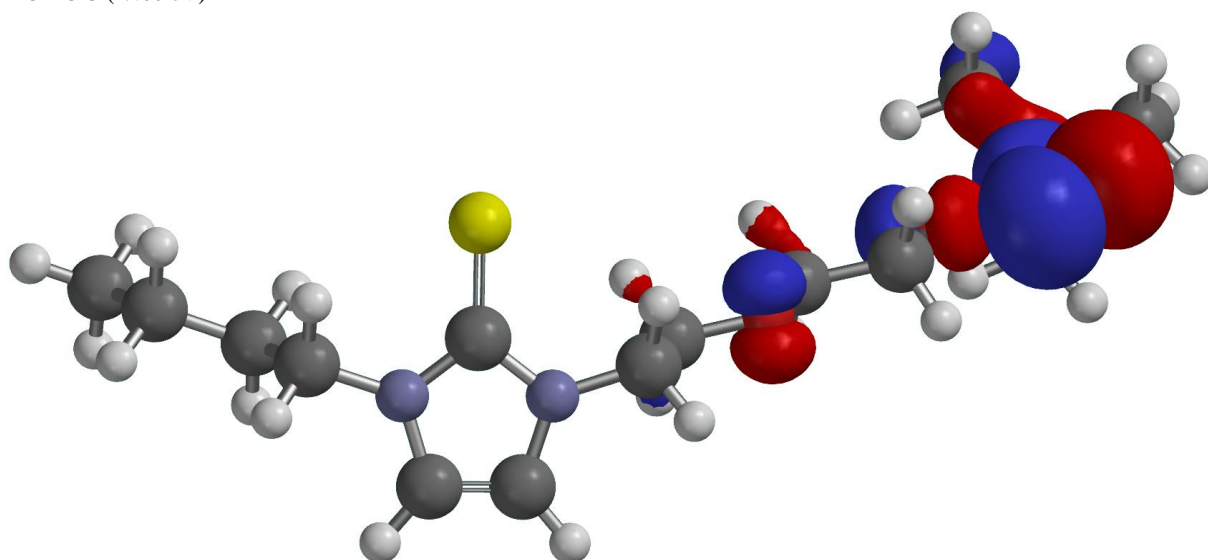

HOMO-4 (-7.97 eV)

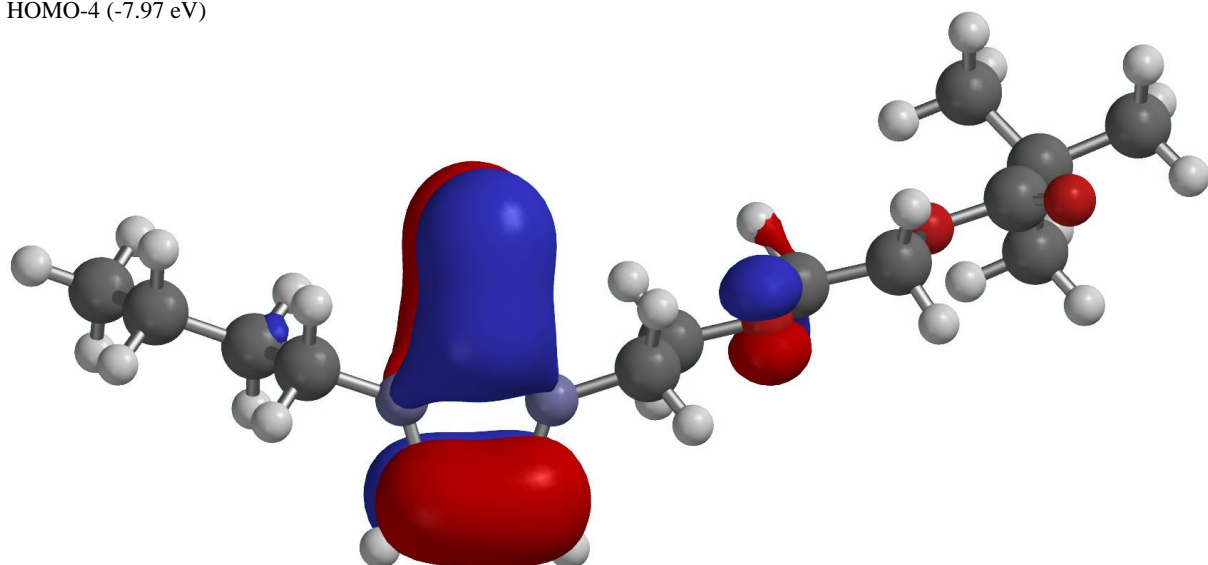

# 17. Particle size

## 17.1 Lithium aluminate

PAQXOS 4.3 **FREE**

$x_{10.3}$  = 6.41  $\mu\text{m}$        $x_{50.3}$  = 22.03  $\mu\text{m}$        $x_{90.3}$  = 82.25  $\mu\text{m}$       SMD = 10.62  $\mu\text{m}$        $C_{\text{opt}}$  = 8.82 %  
 $x_{16.3}$  = 8.64  $\mu\text{m}$        $x_{84.3}$  = 60.70  $\mu\text{m}$        $x_{99.3}$  = 196.31  $\mu\text{m}$       VMD = 35.55  $\mu\text{m}$       SY = 99.80%

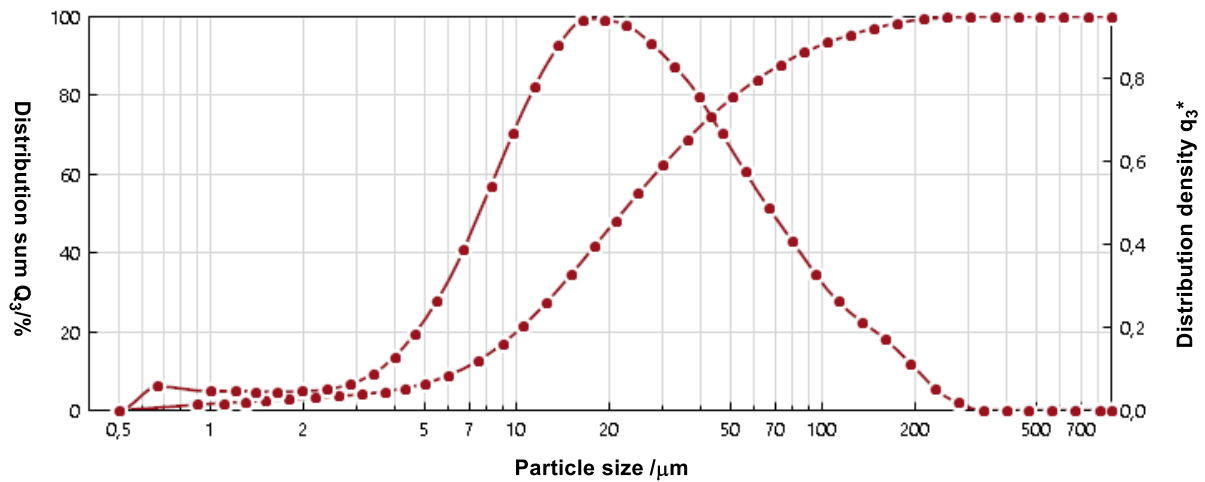

Distribution sum

| $x_0$ / $\mu\text{m}$ | $Q_3$ / % | $x_0$ / $\mu\text{m}$ | $Q_3$ / % |
|-----------------------|-----------|-----------------------|-----------|
| 0.90                  | 1.49      | 30.00                 | 62.26     |
| 1.10                  | 1.89      | 36.00                 | 68.84     |
| 1.30                  | 2.23      | 43.00                 | 74.69     |
| 1.50                  | 2.52      | 51.00                 | 79.64     |
| 1.80                  | 2.88      | 61.00                 | 84.14     |
| 2.20                  | 3.28      | 73.00                 | 87.95     |
| 2.60                  | 3.65      | 87.00                 | 91.06     |
| 3.10                  | 4.14      | 103.00                | 93.47     |
| 3.70                  | 4.82      | 123.00                | 95.50     |
| 4.30                  | 5.67      | 147.00                | 97.15     |
| 5.00                  | 6.88      | 175.00                | 98.46     |
| 6.00                  | 8.98      | 215.00                | 99.48     |
| 7.50                  | 12.75     | 255.00                | 99.86     |
| 9.00                  | 17.04     | 305.00                | 100.00    |
| 10.50                 | 21.52     | 365.00                | 100.00    |
| 12.50                 | 27.45     | 435.00                | 100.00    |
| 15.00                 | 34.42     | 515.00                | 100.00    |
| 18.00                 | 41.88     | 615.00                | 100.00    |
| 21.00                 | 48.19     | 735.00                | 100.00    |
| 25.00                 | 55.24     | 875.00                | 100.00    |

Distribution density (LOG.)

| $x_m$ / $\mu\text{m}$ | $q_3$ lg | $x_m$ / $\mu\text{m}$ | $q_3$ lg |
|-----------------------|----------|-----------------------|----------|
| 0.67                  | 0.058    | 27.39                 | 0.888    |
| 0.99                  | 0.046    | 32.86                 | 0.830    |
| 1.20                  | 0.047    | 39.34                 | 0.759    |
| 1.40                  | 0.046    | 46.83                 | 0.668    |
| 1.64                  | 0.045    | 55.78                 | 0.578    |
| 1.99                  | 0.046    | 66.73                 | 0.489    |
| 2.39                  | 0.051    | 79.69                 | 0.408    |
| 2.84                  | 0.063    | 94.66                 | 0.330    |
| 3.39                  | 0.089    | 112.56                | 0.263    |
| 3.99                  | 0.130    | 134.47                | 0.214    |
| 4.64                  | 0.185    | 160.39                | 0.172    |
| 5.48                  | 0.265    | 193.97                | 0.114    |
| 6.71                  | 0.389    | 234.15                | 0.052    |
| 8.22                  | 0.541    | 278.88                | 0.018    |
| 9.72                  | 0.670    | 333.65                | 0.000    |
| 11.46                 | 0.783    | 398.47                | 0.000    |
| 13.69                 | 0.881    | 473.31                | 0.000    |
| 16.43                 | 0.942    | 562.78                | 0.000    |
| 19.44                 | 0.942    | 672.33                | 0.000    |
| 22.91                 | 0.930    | 801.95                | 0.000    |

PAQXOS 4.3 FREE

$x_{10.3} = 6.39 \mu\text{m}$        $x_{50.3} = 21.89 \mu\text{m}$        $x_{90.3} = 80.30 \mu\text{m}$       SMD =  $10.57 \mu\text{m}$        $C_{\text{opt}} = 8.82 \%$   
 $x_{16.3} = 8.61 \mu\text{m}$        $x_{84.3} = 59.76 \mu\text{m}$        $x_{99.3} = 188.57 \mu\text{m}$       VMD =  $34.84 \mu\text{m}$       SY =  $99.81 \%$

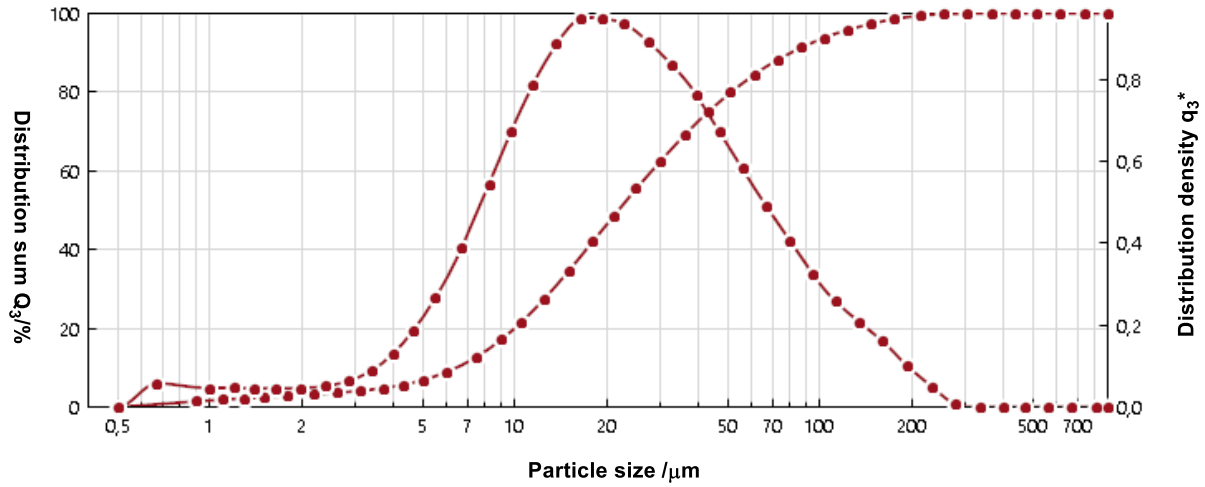

Distribution sum

| $x_0 / \mu\text{m}$ | $Q_3 / \%$ | $x_0 / \mu\text{m}$ | $Q_3 / \%$ |
|---------------------|------------|---------------------|------------|
| 0.90                | 1.50       | 30.00               | 62.57      |
| 1.10                | 1.90       | 36.00               | 69.18      |
| 1.30                | 2.24       | 43.00               | 75.06      |
| 1.50                | 2.53       | 51.00               | 80.04      |
| 1.80                | 2.89       | 61.00               | 84.56      |
| 2.20                | 3.30       | 73.00               | 88.38      |
| 2.60                | 3.67       | 87.00               | 91.48      |
| 3.10                | 4.16       | 103.00              | 93.87      |
| 3.70                | 4.84       | 123.00              | 95.86      |
| 4.30                | 5.70       | 147.00              | 97.47      |
| 5.00                | 6.92       | 175.00              | 98.70      |
| 6.00                | 9.02       | 215.00              | 99.59      |
| 7.50                | 12.81      | 255.00              | 99.95      |
| 9.00                | 17.11      | 305.00              | 100.00     |
| 10.50               | 21.62      | 365.00              | 100.00     |
| 12.50               | 27.57      | 435.00              | 100.00     |
| 15.00               | 34.58      | 515.00              | 100.00     |
| 18.00               | 42.09      | 615.00              | 100.00     |
| 21.00               | 48.43      | 735.00              | 100.00     |
| 25.00               | 55.51      | 875.00              | 100.00     |

Distribution density (LOG.)

| $x_m / \mu\text{m}$ | $q_3 \lg$ | $x_m / \mu\text{m}$ | $q_3 \lg$ |
|---------------------|-----------|---------------------|-----------|
| 0.67                | 0.059     | 27.39               | 0.892     |
| 0.99                | 0.046     | 32.86               | 0.834     |
| 1.20                | 0.047     | 39.34               | 0.762     |
| 1.40                | 0.046     | 46.83               | 0.672     |
| 1.64                | 0.046     | 55.78               | 0.581     |
| 1.99                | 0.047     | 66.73               | 0.491     |
| 2.39                | 0.051     | 79.69               | 0.407     |
| 2.84                | 0.064     | 94.66               | 0.326     |
| 3.39                | 0.089     | 112.56              | 0.258     |
| 3.99                | 0.131     | 134.47              | 0.208     |
| 4.64                | 0.186     | 160.39              | 0.162     |
| 5.48                | 0.266     | 193.97              | 0.100     |
| 6.71                | 0.391     | 234.15              | 0.049     |
| 8.22                | 0.544     | 278.88              | 0.006     |
| 9.72                | 0.673     | 333.65              | 0.000     |
| 11.46               | 0.787     | 398.47              | 0.000     |
| 13.69               | 0.886     | 473.31              | 0.000     |
| 16.43               | 0.948     | 562.78              | 0.000     |
| 19.44               | 0.948     | 672.33              | 0.000     |
| 22.91               | 0.935     | 801.95              | 0.000     |

PAQXOS 4.3 FREE

$x_{10.3} = 6.39 \mu\text{m}$        $x_{50.3} = 21.85 \mu\text{m}$        $x_{90.3} = 79.80 \mu\text{m}$       SMD =  $10.57 \mu\text{m}$        $C_{\text{opt}} = 8.81 \%$   
 $x_{16.3} = 8.61 \mu\text{m}$        $x_{84.3} = 59.48 \mu\text{m}$        $x_{99.3} = 179.28 \mu\text{m}$       VMD =  $34.50 \mu\text{m}$       SY =  $99.81 \%$

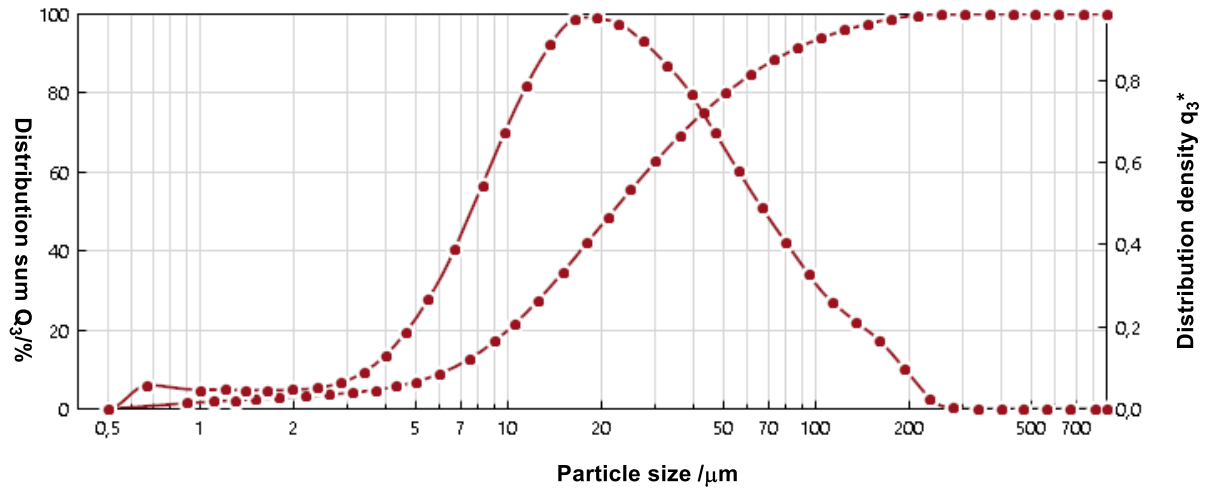

Distribution sum

| $x_0 / \mu\text{m}$ | $Q_3 / \%$ | $x_0 / \mu\text{m}$ | $Q_3 / \%$ |
|---------------------|------------|---------------------|------------|
| 0.90                | 1.49       | 30.00               | 62.67      |
| 1.10                | 1.90       | 36.00               | 69.29      |
| 1.30                | 2.24       | 43.00               | 75.19      |
| 1.50                | 2.53       | 51.00               | 80.17      |
| 1.80                | 2.89       | 61.00               | 84.69      |
| 2.20                | 3.30       | 73.00               | 88.50      |
| 2.60                | 3.67       | 87.00               | 91.59      |
| 3.10                | 4.16       | 103.00              | 93.99      |
| 3.70                | 4.84       | 123.00              | 96.00      |
| 4.30                | 5.70       | 147.00              | 97.64      |
| 5.00                | 6.92       | 175.00              | 98.91      |
| 6.00                | 9.03       | 215.00              | 99.78      |
| 7.50                | 12.82      | 255.00              | 99.97      |
| 9.00                | 17.12      | 305.00              | 100.00     |
| 10.50               | 21.63      | 365.00              | 100.00     |
| 12.50               | 27.59      | 435.00              | 100.00     |
| 15.00               | 34.61      | 515.00              | 100.00     |
| 18.00               | 42.13      | 615.00              | 100.00     |
| 21.00               | 48.49      | 735.00              | 100.00     |
| 25.00               | 55.59      | 875.00              | 100.00     |

Distribution density (LOG.)

| $x_m / \mu\text{m}$ | $q_3 \lg$ | $x_m / \mu\text{m}$ | $q_3 \lg$ |
|---------------------|-----------|---------------------|-----------|
| 0.67                | 0.059     | 27.39               | 0.894     |
| 0.99                | 0.046     | 32.86               | 0.836     |
| 1.20                | 0.047     | 39.34               | 0.764     |
| 1.40                | 0.046     | 46.83               | 0.673     |
| 1.64                | 0.046     | 55.78               | 0.580     |
| 1.99                | 0.047     | 66.73               | 0.489     |
| 2.39                | 0.052     | 79.69               | 0.406     |
| 2.84                | 0.064     | 94.66               | 0.327     |
| 3.39                | 0.089     | 112.56              | 0.261     |
| 3.99                | 0.131     | 134.47              | 0.212     |
| 4.64                | 0.186     | 160.39              | 0.167     |
| 5.48                | 0.266     | 193.97              | 0.098     |
| 6.71                | 0.391     | 234.15              | 0.026     |
| 8.22                | 0.544     | 278.88              | 0.003     |
| 9.72                | 0.673     | 333.65              | 0.000     |
| 11.46               | 0.787     | 398.47              | 0.000     |
| 13.69               | 0.887     | 473.31              | 0.000     |
| 16.43               | 0.949     | 562.78              | 0.000     |
| 19.44               | 0.950     | 672.33              | 0.000     |
| 22.91               | 0.938     | 801.95              | 0.000     |

## 17.2 Gehlenite

PAQXOS 4.3 **FREE**

$x_{10,3} = 3.88 \mu\text{m}$        $x_{50,3} = 117.59 \mu\text{m}$        $x_{90,3} = 356.05 \mu\text{m}$       SMD =  $10.23 \mu\text{m}$        $C_{\text{opt}} = 11.20\%$   
 $x_{16,3} = 10.00 \mu\text{m}$        $x_{84,3} = 305.88 \mu\text{m}$        $x_{99,3} = 512.38 \mu\text{m}$       VMD =  $152.20 \mu\text{m}$       SY =  $99.72\%$

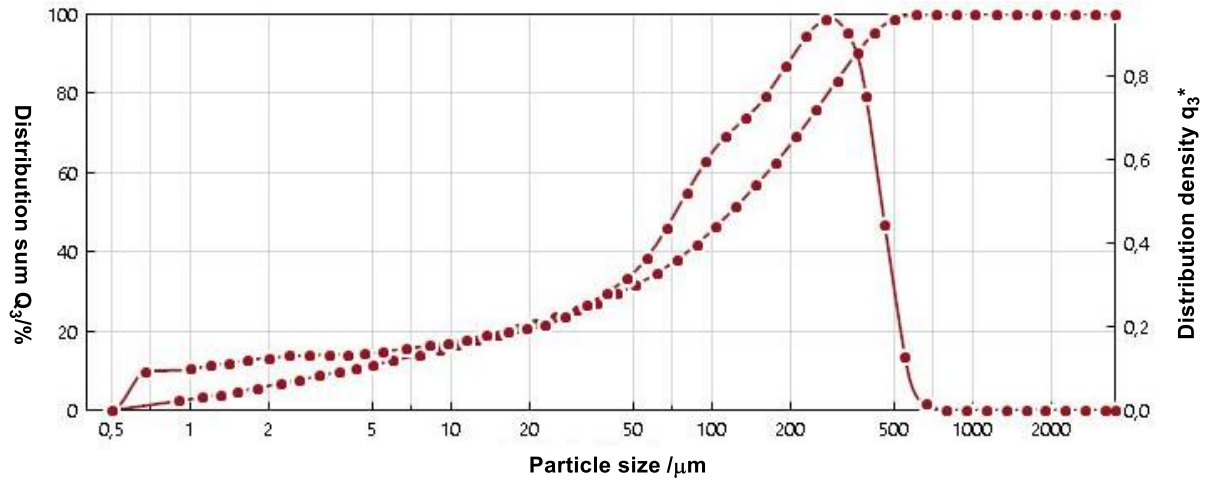

Distribution sum

| $x_0 / \mu\text{m}$ | $Q_3 / \%$ | $x_0 / \mu\text{m}$ | $Q_3 / \%$ |
|---------------------|------------|---------------------|------------|
| 0.90                | 2.36       | 61.00               | 34.52      |
| 1.10                | 3.22       | 73.00               | 37.93      |
| 1.30                | 4.00       | 87.00               | 41.91      |
| 1.50                | 4.71       | 103.00              | 46.30      |
| 1.80                | 5.66       | 123.00              | 51.37      |
| 2.20                | 6.76       | 147.00              | 56.81      |
| 2.60                | 7.71       | 175.00              | 62.52      |
| 3.10                | 8.72       | 210.00              | 69.06      |
| 3.70                | 9.74       | 250.00              | 75.86      |
| 4.30                | 10.62      | 300.00              | 83.30      |
| 5.00                | 11.50      | 360.00              | 90.47      |
| 6.00                | 12.62      | 420.00              | 95.51      |
| 7.50                | 14.05      | 500.00              | 98.87      |
| 9.00                | 15.28      | 600.00              | 99.89      |
| 10.50               | 16.36      | 720.00              | 100.00     |
| 12.50               | 17.64      | 860.00              | 100.00     |
| 15.00               | 19.05      | 1020.00             | 100.00     |
| 18.00               | 20.55      | 1220.00             | 100.00     |
| 21.00               | 21.87      | 1460.00             | 100.00     |
| 25.00               | 23.43      | 1740.00             | 100.00     |
| 30.00               | 25.20      | 2060.00             | 100.00     |
| 36.00               | 27.18      | 2460.00             | 100.00     |
| 43.00               | 29.36      | 2940.00             | 100.00     |
| 51.00               | 31.69      | 3500.00             | 100.00     |

Distribution density (LOG.)

| $x_m / \mu\text{m}$ | $q_3 \lg$ | $x_m / \mu\text{m}$ | $q_3 \lg$ |
|---------------------|-----------|---------------------|-----------|
| 0.67                | 0.093     | 55.78               | 0.365     |
| 0.99                | 0.098     | 66.73               | 0.437     |
| 1.20                | 0.108     | 79.69               | 0.522     |
| 1.40                | 0.114     | 94.66               | 0.599     |
| 1.64                | 0.120     | 112.56              | 0.657     |
| 1.99                | 0.126     | 134.47              | 0.702     |
| 2.39                | 0.130     | 160.39              | 0.754     |
| 2.84                | 0.132     | 191.70              | 0.827     |
| 3.39                | 0.133     | 229.13              | 0.898     |
| 3.99                | 0.134     | 273.86              | 0.939     |
| 4.64                | 0.136     | 328.63              | 0.906     |
| 5.48                | 0.141     | 388.84              | 0.753     |
| 6.71                | 0.148     | 458.26              | 0.444     |
| 8.22                | 0.155     | 547.72              | 0.128     |
| 9.72                | 0.162     | 657.27              | 0.014     |
| 11.46               | 0.168     | 786.89              | 0.000     |
| 13.69               | 0.179     | 936.59              | 0.000     |
| 16.43               | 0.189     | 1115.53             | 0.000     |
| 19.44               | 0.197     | 1334.62             | 0.000     |
| 22.91               | 0.206     | 1593.86             | 0.000     |
| 27.39               | 0.224     | 1893.25             | 0.000     |
| 32.86               | 0.251     | 2251.13             | 0.000     |
| 39.34               | 0.282     | 2689.31             | 0.000     |
| 46.83               | 0.315     | 3207.80             | 0.000     |

PAQXOS 4.3 **FREE**

$x_{10,3}$  = 3.94  $\mu\text{m}$        $x_{50,3}$  = 119.61  $\mu\text{m}$        $x_{90,3}$  = 360.99  $\mu\text{m}$       SMD = 10.33  $\mu\text{m}$        $C_{\text{opt}}$  = 11.22%  
 $x_{16,3}$  = 10.20  $\mu\text{m}$        $x_{84,3}$  = 310.30  $\mu\text{m}$        $x_{99,3}$  = 538.11  $\mu\text{m}$       VMD = 154.80  $\mu\text{m}$       SY = 99.73%

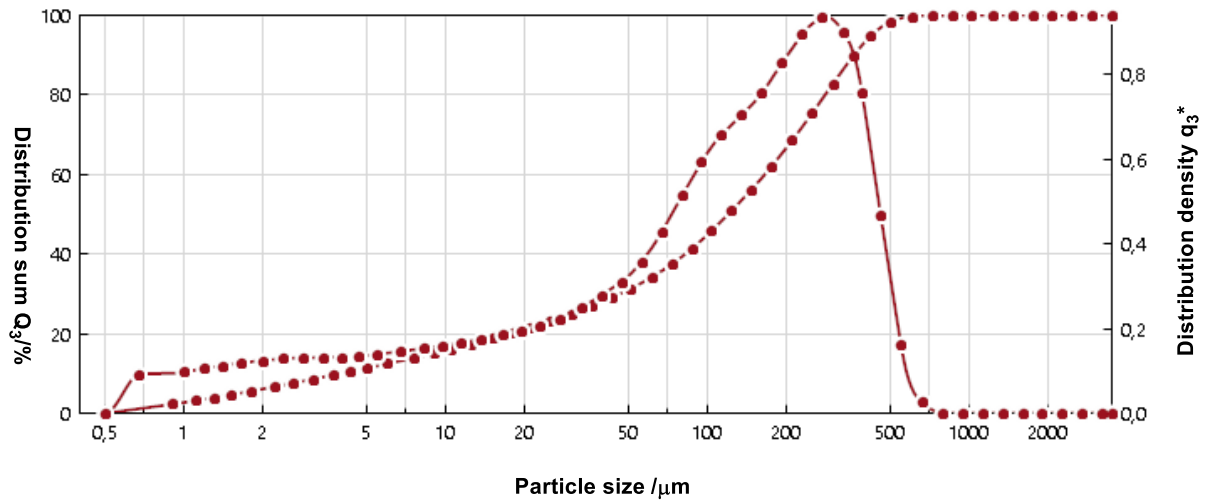

| Distribution sum      |           |                       |           | Distribution density (LOG.) |          |                       |          |
|-----------------------|-----------|-----------------------|-----------|-----------------------------|----------|-----------------------|----------|
| $x_0$ / $\mu\text{m}$ | $Q_3$ / % | $x_0$ / $\mu\text{m}$ | $Q_3$ / % | $x_m$ / $\mu\text{m}$       | $q_3$ lg | $x_m$ / $\mu\text{m}$ | $q_3$ lg |
| 0.90                  | 2.34      | 61.00                 | 34.18     | 0.67                        | 0.092    | 55.78                 | 0.359    |
| 1.10                  | 3.19      | 73.00                 | 37.52     | 0.99                        | 0.097    | 66.73                 | 0.429    |
| 1.30                  | 3.96      | 87.00                 | 41.44     | 1.20                        | 0.107    | 79.69                 | 0.514    |
| 1.50                  | 4.66      | 103.00                | 45.79     | 1.40                        | 0.113    | 94.66                 | 0.594    |
| 1.80                  | 5.61      | 123.00                | 50.86     | 1.64                        | 0.119    | 112.56                | 0.658    |
| 2.20                  | 6.70      | 147.00                | 56.31     | 1.99                        | 0.125    | 134.47                | 0.705    |
| 2.60                  | 7.63      | 175.00                | 62.04     | 2.39                        | 0.129    | 160.39                | 0.756    |
| 3.10                  | 8.64      | 210.00                | 68.59     | 2.84                        | 0.131    | 191.70                | 0.827    |
| 3.70                  | 9.65      | 250.00                | 75.37     | 3.39                        | 0.132    | 229.13                | 0.896    |
| 4.30                  | 10.52     | 300.00                | 82.77     | 3.99                        | 0.133    | 273.86                | 0.935    |
| 5.00                  | 11.40     | 360.00                | 89.92     | 4.64                        | 0.135    | 328.63                | 0.902    |
| 6.00                  | 12.51     | 420.00                | 94.98     | 5.48                        | 0.140    | 388.84                | 0.756    |
| 7.50                  | 13.93     | 500.00                | 98.51     | 6.71                        | 0.147    | 458.26                | 0.467    |
| 9.00                  | 15.14     | 600.00                | 99.79     | 8.22                        | 0.153    | 547.72                | 0.161    |
| 10.50                 | 16.22     | 720.00                | 100.00    | 9.72                        | 0.160    | 657.27                | 0.026    |
| 12.50                 | 17.48     | 860.00                | 100.00    | 11.46                       | 0.166    | 786.89                | 0.000    |
| 15.00                 | 18.87     | 1020.00               | 100.00    | 13.69                       | 0.176    | 936.59                | 0.000    |
| 18.00                 | 20.33     | 1220.00               | 100.00    | 16.43                       | 0.185    | 1115.53               | 0.000    |
| 21.00                 | 21.63     | 1460.00               | 100.00    | 19.44                       | 0.193    | 1334.62               | 0.000    |
| 25.00                 | 23.18     | 1740.00               | 100.00    | 22.91                       | 0.205    | 1593.86               | 0.000    |
| 30.00                 | 24.95     | 2060.00               | 100.00    | 27.39                       | 0.224    | 1893.25               | 0.000    |
| 36.00                 | 26.93     | 2460.00               | 100.00    | 32.86                       | 0.250    | 2251.13               | 0.000    |
| 43.00                 | 29.08     | 2940.00               | 100.00    | 39.34                       | 0.279    | 2689.31               | 0.000    |
| 51.00                 | 31.39     | 3500.00               | 100.00    | 46.83                       | 0.311    | 3207.80               | 0.000    |

PAQXOS 4.3 FREE

$x_{10,3} = 3.64 \mu\text{m}$        $x_{50,3} = 110.78 \mu\text{m}$        $x_{90,3} = 330.06 \mu\text{m}$       SMD =  $9.88 \mu\text{m}$        $C_{\text{opt}} = 11.22\%$   
 $x_{16,3} = 9.21 \mu\text{m}$        $x_{84,3} = 282.36 \mu\text{m}$        $x_{99,3} = 486.48 \mu\text{m}$       VMD =  $141.18 \mu\text{m}$       SY =  $99.67\%$

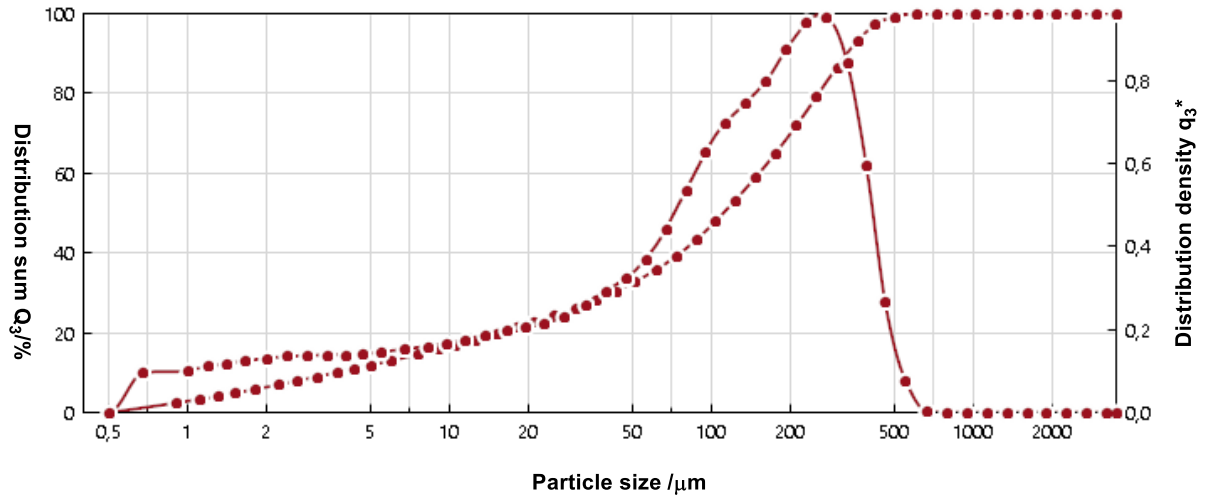

| Distribution sum    |            |                     |            | Distribution density (LOG.) |           |                     |           |
|---------------------|------------|---------------------|------------|-----------------------------|-----------|---------------------|-----------|
| $x_0 / \mu\text{m}$ | $Q_3 / \%$ | $x_0 / \mu\text{m}$ | $Q_3 / \%$ | $x_m / \mu\text{m}$         | $q_3 \lg$ | $x_m / \mu\text{m}$ | $q_3 \lg$ |
| 0.90                | 2.44       | 61.00               | 35.77      | 0.67                        | 0.096     | 55.78               | 0.370     |
| 1.10                | 3.33       | 73.00               | 39.22      | 0.99                        | 0.102     | 66.73               | 0.443     |
| 1.30                | 4.14       | 87.00               | 43.31      | 1.20                        | 0.112     | 79.69               | 0.536     |
| 1.50                | 4.87       | 103.00              | 47.91      | 1.40                        | 0.118     | 94.66               | 0.627     |
| 1.80                | 5.86       | 123.00              | 53.29      | 1.64                        | 0.125     | 112.56              | 0.698     |
| 2.20                | 7.00       | 147.00              | 59.06      | 1.99                        | 0.131     | 134.47              | 0.746     |
| 2.60                | 7.99       | 175.00              | 65.09      | 2.39                        | 0.136     | 160.39              | 0.797     |
| 3.10                | 9.04       | 210.00              | 72.01      | 2.84                        | 0.138     | 191.70              | 0.873     |
| 3.70                | 10.10      | 250.00              | 79.12      | 3.39                        | 0.139     | 229.13              | 0.940     |
| 4.30                | 11.01      | 300.00              | 86.66      | 3.99                        | 0.139     | 273.86              | 0.952     |
| 5.00                | 11.94      | 360.00              | 93.33      | 4.64                        | 0.141     | 328.63              | 0.843     |
| 6.00                | 13.09      | 420.00              | 97.31      | 5.48                        | 0.146     | 388.84              | 0.595     |
| 7.50                | 14.58      | 500.00              | 99.34      | 6.71                        | 0.153     | 458.26              | 0.268     |
| 9.00                | 15.84      | 600.00              | 99.97      | 8.22                        | 0.160     | 547.72              | 0.079     |
| 10.50               | 16.96      | 720.00              | 100.00     | 9.72                        | 0.168     | 657.27              | 0.004     |
| 12.50               | 18.29      | 860.00              | 100.00     | 11.46                       | 0.175     | 786.89              | 0.000     |
| 15.00               | 19.76      | 1020.00             | 100.00     | 13.69                       | 0.186     | 936.59              | 0.000     |
| 18.00               | 21.33      | 1220.00             | 100.00     | 16.43                       | 0.198     | 1115.53             | 0.000     |
| 21.00               | 22.71      | 1460.00             | 100.00     | 19.44                       | 0.206     | 1334.62             | 0.000     |
| 25.00               | 24.34      | 1740.00             | 100.00     | 22.91                       | 0.215     | 1593.86             | 0.000     |
| 30.00               | 26.18      | 2060.00             | 100.00     | 27.39                       | 0.232     | 1893.25             | 0.000     |
| 36.00               | 28.24      | 2460.00             | 100.00     | 32.86                       | 0.261     | 2251.13             | 0.000     |
| 43.00               | 30.50      | 2940.00             | 100.00     | 39.34                       | 0.292     | 2689.31             | 0.000     |
| 51.00               | 32.89      | 3500.00             | 100.00     | 46.83                       | 0.323     | 3207.80             | 0.000     |



# 17.3 Spodumene

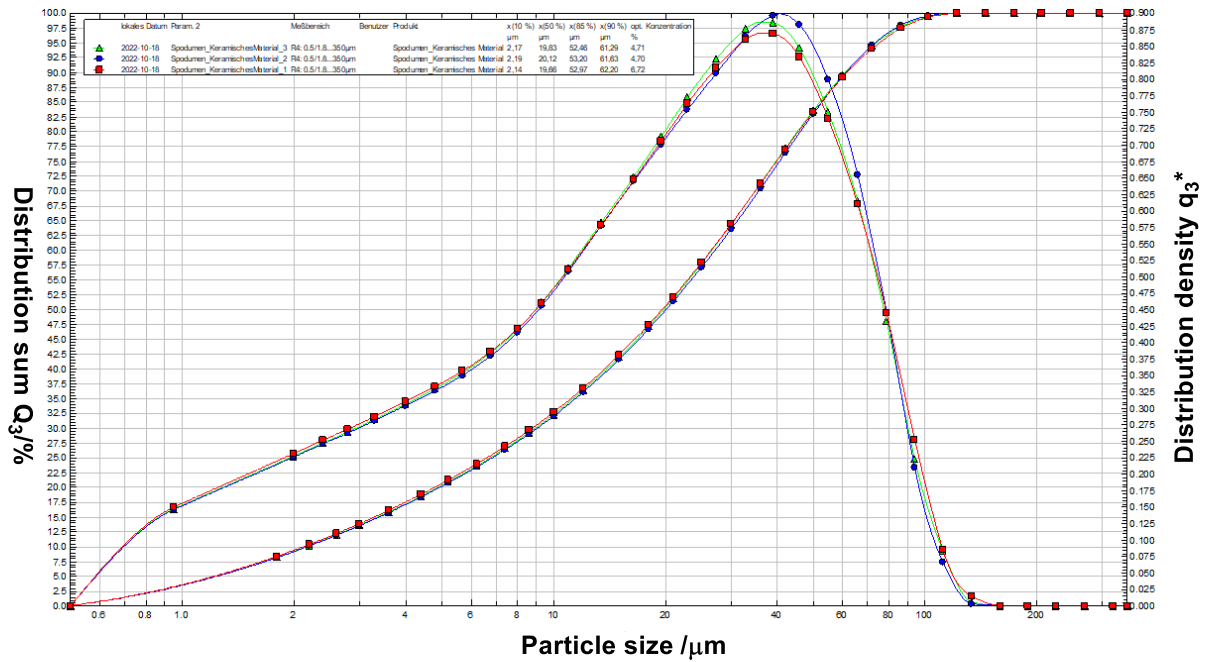

### HELOS (H2634) & RODOS. R4: 0.5/1.8...350μm

$x_{10}$  = 2.28 μm       $x_{50}$  = 20.67 μm       $x_{90}$  = 61.56 μm      SMD = 6.72 μm

VMD = 26.96 μm

$x_{16}$  = 3.89 μm       $x_{84}$  = 51.39 μm       $x_{99}$  = 98.28 μm      SV = 0.89 m<sup>2</sup>/cm<sup>3</sup>

Sm = 2125.86 cm<sup>2</sup>/g

### Distribution sum

| $x_0$ /μm | $Q_3$ /% |
|-----------|----------|-----------|----------|-----------|----------|-----------|----------|
| 1.80      | 7.76     | 7.40      | 25.48    | 30.00     | 63.13    | 122.00    | 99.97    |
| 2.20      | 9.64     | 8.60      | 28.17    | 36.00     | 70.29    | 146.00    | 100.00   |
| 2.60      | 11.35    | 10.00     | 31.14    | 42.00     | 76.45    | 174.00    | 100.00   |
| 3.00      | 12.92    | 12.00     | 35.13    | 50.00     | 83.14    | 206.00    | 100.00   |
| 3.60      | 15.07    | 15.00     | 40.67    | 60.00     | 89.34    | 246.00    | 100.00   |
| 4.40      | 17.64    | 18.00     | 45.77    | 72.00     | 94.39    | 294.00    | 100.00   |
| 5.20      | 19.96    | 21.00     | 50.52    | 86.00     | 97.77    | 350.00    | 100.00   |
| 6.20      | 22.59    | 25.00     | 56.42    | 102.00    | 99.37    |           |          |

Distribution density (log.)

| $x_m/\mu\text{m}$ | $q_3 \lg$ |
|-------------------|-----------|-------------------|-----------|-------------------|-----------|-------------------|-----------|
| 0.95              | 0.14      | 6.77              | 0.38      | 27.39             | 0.85      | 111.55            | 0.08      |
| 1.99              | 0.22      | 7.98              | 0.41      | 32.86             | 0.90      | 133.46            | 0.00      |
| 2.39              | 0.24      | 9.27              | 0.45      | 38.88             | 0.92      | 159.39            | 0.00      |
| 2.79              | 0.25      | 10.95             | 0.50      | 45.83             | 0.88      | 189.33            | 0.00      |
| 3.29              | 0.27      | 13.42             | 0.57      | 54.77             | 0.78      | 225.11            | 0.00      |
| 3.98              | 0.30      | 16.43             | 0.64      | 65.73             | 0.64      | 268.93            | 0.00      |
| 4.78              | 0.32      | 19.44             | 0.71      | 78.69             | 0.44      | 320.78            | 0.00      |
| 5.68              | 0.34      | 22.91             | 0.78      | 93.66             | 0.22      |                   |           |

**HELOS (H2634) & RODOS. R4: 0.5/1.8...350 $\mu\text{m}$**

|          |                                  |          |                       |          |                       |     |                                 |
|----------|----------------------------------|----------|-----------------------|----------|-----------------------|-----|---------------------------------|
| $x_{10}$ | = 2.26 $\mu\text{m}$             | $x_{50}$ | = 20.52 $\mu\text{m}$ | $x_{90}$ | = 62.01 $\mu\text{m}$ | SMD | = 6.67 $\mu\text{m}$            |
| VMD      | = 27.01 $\mu\text{m}$            |          |                       |          |                       |     |                                 |
| $x_{16}$ | = 3.83 $\mu\text{m}$             | $x_{84}$ | = 51.53 $\mu\text{m}$ | $x_{99}$ | = 99.67 $\mu\text{m}$ | SV  | = 0.90 $\text{m}^2/\text{cm}^3$ |
| Sm       | = 2143.27 $\text{cm}^2/\text{g}$ |          |                       |          |                       |     |                                 |

Distribution sum

| $x_0/\mu\text{m}$ | $Q_3/\%$ | $x_0/\mu\text{m}$ | $Q_3/\%$ | $x_0/\mu\text{m}$ | $Q_3/\%$ | $x_0/\mu\text{m}$ | $Q_3/\%$ |
|-------------------|----------|-------------------|----------|-------------------|----------|-------------------|----------|
| 1.80              | 7.85     | 7.40              | 25.74    | 30.00             | 63.30    | 122.00            | 99.95    |
| 2.20              | 9.76     | 8.60              | 28.43    | 36.00             | 70.38    | 146.00            | 100.00   |
| 2.60              | 11.49    | 10.00             | 31.38    | 42.00             | 76.46    | 174.00            | 100.00   |
| 3.00              | 13.08    | 12.00             | 35.36    | 50.00             | 83.07    | 206.00            | 100.00   |
| 3.60              | 15.26    | 15.00             | 40.91    | 60.00             | 89.17    | 246.00            | 100.00   |
| 4.40              | 17.86    | 18.00             | 46.01    | 72.00             | 94.13    | 294.00            | 100.00   |
| 5.20              | 20.20    | 21.00             | 50.77    | 86.00             | 97.53    | 350.00            | 100.00   |
| 6.20              | 22.84    | 25.00             | 56.64    | 102.00            | 99.25    |                   |          |

Distribution density (log.)

| $x_m/\mu\text{m}$ | $q_3 \lg$ |
|-------------------|-----------|-------------------|-----------|-------------------|-----------|-------------------|-----------|
| 0.95              | 0.14      | 6.77              | 0.38      | 27.39             | 0.84      | 111.55            | 0.09      |
| 1.99              | 0.22      | 7.98              | 0.41      | 32.86             | 0.89      | 133.46            | 0.01      |
| 2.39              | 0.24      | 9.27              | 0.45      | 38.88             | 0.91      | 159.39            | 0.00      |
| 2.79              | 0.26      | 10.95             | 0.50      | 45.83             | 0.87      | 189.33            | 0.00      |
| 3.29              | 0.28      | 13.42             | 0.57      | 54.77             | 0.77      | 225.11            | 0.00      |
| 3.98              | 0.30      | 16.43             | 0.64      | 65.73             | 0.63      | 268.93            | 0.00      |
| 4.78              | 0.32      | 19.44             | 0.71      | 78.69             | 0.44      | 320.78            | 0.00      |
| 5.68              | 0.35      | 22.91             | 0.78      | 93.66             | 0.23      |                   |           |

**HELOS (H2634) & RODOS. R4: 0.5/1.8...350 $\mu\text{m}$**

|          |                                  |          |                       |          |                       |     |                                 |
|----------|----------------------------------|----------|-----------------------|----------|-----------------------|-----|---------------------------------|
| $x_{10}$ | = 2.25 $\mu\text{m}$             | $x_{50}$ | = 20.71 $\mu\text{m}$ | $x_{90}$ | = 61.76 $\mu\text{m}$ | SMD | = 6.68 $\mu\text{m}$            |
| VMD      | = 27.05 $\mu\text{m}$            |          |                       |          |                       |     |                                 |
| $x_{16}$ | = 3.84 $\mu\text{m}$             | $x_{84}$ | = 51.58 $\mu\text{m}$ | $x_{99}$ | = 98.65 $\mu\text{m}$ | SV  | = 0.90 $\text{m}^2/\text{cm}^3$ |
| Sm       | = 2138.92 $\text{cm}^2/\text{g}$ |          |                       |          |                       |     |                                 |

Distribution sum

| $x_0/\mu\text{m}$ | $Q_3/\%$ | $x_0/\mu\text{m}$ | $Q_3/\%$ | $x_0/\mu\text{m}$ | $Q_3/\%$ | $x_0/\mu\text{m}$ | $Q_3/\%$ |
|-------------------|----------|-------------------|----------|-------------------|----------|-------------------|----------|
| 1.80              | 7.87     | 7.40              | 25.57    | 30.00             | 62.92    | 122.00            | 99.96    |
| 2.20              | 9.77     | 8.60              | 28.23    | 36.00             | 70.06    | 146.00            | 100.00   |
| 2.60              | 11.50    | 10.00             | 31.18    | 42.00             | 76.25    | 174.00            | 100.00   |
| 3.00              | 13.08    | 12.00             | 35.15    | 50.00             | 83.01    | 206.00            | 100.00   |
| 3.60              | 15.23    | 15.00             | 40.67    | 60.00             | 89.26    | 246.00            | 100.00   |
| 4.40              | 17.79    | 18.00             | 45.75    | 72.00             | 94.31    | 294.00            | 100.00   |
| 5.20              | 20.09    | 21.00             | 50.46    | 86.00             | 97.70    | 350.00            | 100.00   |
| 6.20              | 22.70    | 25.00             | 56.28    | 102.00            | 99.34    |                   |          |

Distribution density (log.)

| $x_m/\mu\text{m}$ | $q_3 \lg$ |
|-------------------|-----------|-------------------|-----------|-------------------|-----------|-------------------|-----------|
| 0.95              | 0.14      | 6.77              | 0.37      | 27.39             | 0.84      | 111.55            | 0.08      |
| 1.99              | 0.22      | 7.98              | 0.41      | 32.86             | 0.90      | 133.46            | 0.00      |
| 2.39              | 0.24      | 9.27              | 0.45      | 38.88             | 0.93      | 159.39            | 0.00      |
| 2.79              | 0.25      | 10.95             | 0.50      | 45.83             | 0.89      | 189.33            | 0.00      |
| 3.29              | 0.27      | 13.42             | 0.57      | 54.77             | 0.79      | 225.11            | 0.00      |
| 3.98              | 0.29      | 16.43             | 0.64      | 65.73             | 0.64      | 268.93            | 0.00      |
| 4.78              | 0.32      | 19.44             | 0.70      | 78.69             | 0.44      | 320.78            | 0.00      |
| 5.68              | 0.34      | 22.91             | 0.77      | 93.66             | 0.22      |                   |           |

**HELOS (H2634) & RODOS. R5: 0.5/4.5...875 $\mu\text{m}$**

|          |                                  |          |                       |          |                        |     |                                 |
|----------|----------------------------------|----------|-----------------------|----------|------------------------|-----|---------------------------------|
| $x_{10}$ | = 3.21 $\mu\text{m}$             | $x_{50}$ | = 24.52 $\mu\text{m}$ | $x_{90}$ | = 70.69 $\mu\text{m}$  | SMD | = 9.67 $\mu\text{m}$            |
| VMD      | = 31.46 $\mu\text{m}$            |          |                       |          |                        |     |                                 |
| $x_{16}$ | = 4.95 $\mu\text{m}$             | $x_{84}$ | = 58.69 $\mu\text{m}$ | $x_{99}$ | = 118.41 $\mu\text{m}$ | SV  | = 0.62 $\text{m}^2/\text{cm}^3$ |
| Sm       | = 1478.08 $\text{cm}^2/\text{g}$ |          |                       |          |                        |     |                                 |

Distribution sum

| $x_0/\mu\text{m}$ | $Q_3/\%$ | $x_0/\mu\text{m}$ | $Q_3/\%$ | $x_0/\mu\text{m}$ | $Q_3/\%$ | $x_0/\mu\text{m}$ | $Q_3/\%$ |
|-------------------|----------|-------------------|----------|-------------------|----------|-------------------|----------|
| 4.50              | 14.77    | 18.50             | 41.60    | 75.00             | 91.87    | 305.00            | 100.00   |
| 5.50              | 17.53    | 21.50             | 45.88    | 90.00             | 95.86    | 365.00            | 100.00   |
| 6.50              | 20.04    | 25.00             | 50.66    | 105.00            | 98.10    | 435.00            | 100.00   |
| 7.50              | 22.37    | 30.00             | 57.14    | 125.00            | 99.44    | 515.00            | 100.00   |
| 9.00              | 25.58    | 37.50             | 66.04    | 150.00            | 99.97    | 615.00            | 100.00   |
| 11.00             | 29.46    | 45.00             | 73.71    | 180.00            | 100.00   | 735.00            | 100.00   |
| 13.00             | 33.00    | 52.50             | 80.03    | 215.00            | 100.00   | 875.00            | 100.00   |
| 15.50             | 37.07    | 62.50             | 86.44    | 255.00            | 100.00   |                   |          |

Distribution density (log.)

| $x_m/\mu\text{m}$ | $q_3 \lg$ |
|-------------------|-----------|-------------------|-----------|-------------------|-----------|-------------------|-----------|
| 1.50              | 0.15      | 16.93             | 0.59      | 68.47             | 0.69      | 278.88            | 0.00      |
| 4.97              | 0.32      | 19.94             | 0.66      | 82.16             | 0.50      | 333.65            | 0.00      |
| 5.98              | 0.35      | 23.18             | 0.73      | 97.21             | 0.33      | 398.47            | 0.00      |
| 6.98              | 0.37      | 27.39             | 0.82      | 114.56            | 0.18      | 473.31            | 0.00      |
| 8.22              | 0.41      | 33.54             | 0.92      | 136.93            | 0.07      | 562.78            | 0.00      |
| 9.95              | 0.45      | 41.08             | 0.97      | 164.32            | 0.00      | 672.33            | 0.00      |
| 11.96             | 0.49      | 48.61             | 0.94      | 196.72            | 0.00      | 801.95            | 0.00      |
| 14.20             | 0.53      | 57.28             | 0.85      | 234.15            | 0.00      |                   |           |
